# Supplementary material for: Pd-Catalyzed coupling of benzyl bromides with BMIDA-substituted N-tosylhydrazones: synthesis of trans-alkenyl MIDA boronates
Source: Royal Society of Chemistry journal article supplement (doi:10.1039/d1cc06170d), 2021-12-06

*Electronic Supplementary Information (ESI)*

**Pd-Catalyzed Coupling of Benzyl Bromides with BMIDA-substituted  
N-Tosylhydrazones: Synthesis of *trans*-Alkenyl MIDA Boronates**

Shichao Li,<sup>a</sup> Muyao Li<sup>a</sup>, Shu-Sen Li<sup>a</sup> and Jianbo Wang<sup>ab\*</sup>

<sup>a</sup>*Beijing National Laboratory of Molecular Sciences (BNLMS), Key Laboratory of Bioorganic Chemistry  
and Molecular Engineering of Ministry of Education, College of Chemistry, Peking University, Beijing  
100871, China.*

<sup>b</sup>*The State Key Laboratory of Organometallic Chemistry, Shanghai Institute of Organic Chemistry,  
Chinese Academy of Sciences, Shanghai 200032, China*

*Email: [wangjb@pku.edu.cn](mailto:wangjb@pku.edu.cn)*

**CONTENTS**

|                                                                                                             |     |
|-------------------------------------------------------------------------------------------------------------|-----|
| 1. General .....                                                                                            | S2  |
| 2. General procedure for Pd-catalyzed synthesis of vinylboronates .....                                     | S2  |
| 3. General procedure for Suzuki-Miyaura coupling of aryl bromides with alkenyl MIDA boronate <b>2</b> ..... | S3  |
| 4. Other transformation of alkenyl MIDA boronate <b>2</b> .....                                             | S3  |
| 5. Characterization data of the products .....                                                              | S3  |
| 6. References .....                                                                                         | S14 |
| 7. NMR spectra of the products.....                                                                         | S15 |

## 1. General

All the Pd-catalyzed reactions were performed under nitrogen atmosphere in an oven-dried reaction tube. THF, toluene, dioxane was dried over Na with benzophenone-ketyl intermediate as indicator; MeCN was dried over CaH<sub>2</sub>. For chromatography, 200-300 mesh silica gel (Qingdao, China) was employed. <sup>1</sup>H and <sup>13</sup>C NMR spectra were recorded at 400 MHz and 100 MHz with Bruker ARX 400 spectrometer. Chemical shifts are reported in ppm using tetramethylsilane as internal standard when using CDCl<sub>3</sub>, CD<sub>3</sub>CN, (CD<sub>3</sub>)<sub>2</sub>CO as the solvent, and coupling constants (*J*) were in Hertz (Hz). IR spectra were recorded on Nicolet 5MX-S infrared spectrometer and were reported in terms of frequency of absorption (cm<sup>-1</sup>). High-resolution mass spectra (HRMS) were obtained on a Bruker APEX IV FTMS instrument and a Bruker Solarix XR FTMS instrument by ESI. Benzyl bromides were bought and used directly without further purification. Pd<sub>2</sub>dba<sub>3</sub> was purchased from Adamas, Inc. and Cs<sub>2</sub>CO<sub>3</sub> and P(2-furyl)<sub>3</sub> were purchased from Energy Chemicals. These commercial chemicals were used without further purification. PE: petroleum ether; EA: ethyl acetate. S-Phos: 2-dicyclohexylphosphino-2',6'-dimethoxybiphenyl. Multiplicities are reported using the following abbreviations: s = singlet, d = doublet, t = triplet, q = quartet, m = multiplet.

BMIDA substituted *N*-tosylhydrozone **1** was synthesized according to literature<sup>1</sup>

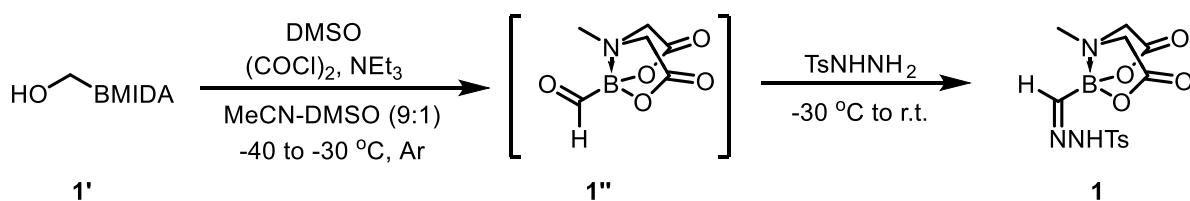

DMSO (0.23 mL, 3.21 mmol) was dissolved in CH<sub>3</sub>CN (20 mL) under Ar atmosphere and the solution was cooled to -40 °C. (COCl)<sub>2</sub> (0.26 mL, 3.08 mmol) was added and the mixture was stirred for 15 min at -40 °C to -30 °C interval. A solution of hydroxymethyl MIDA boronate **1'** (500 mg, 2.67 mmol) in 1:1 mixture of DMSO-CH<sub>3</sub>CN (5 mL) was added dropwise. The mixture was stirred at the same temperature interval for 30 min (Note: It is important to control specified temperature. Below -40 °C, the mixture starts to freeze, and above -30 °C, the yield decreases dramatically). NEt<sub>3</sub> (0.86 mL, 6.15 mmol) was added and the mixture was allowed to reach 0 °C during 40 min. At this point TsNHNH<sub>2</sub> (570 mg, 3.06 mmol) was added. The reaction mixture was stirred overnight at ambient temperature and evaporated. The residue was quenched with half-saturated NaCl/H<sub>2</sub>O (30 mL) and extracted with EtOAc (3×30 mL). The product crystallized directly from reaction mixture after quenching with H<sub>2</sub>O/EtOAc, BMIDA substituted *N*-tosylhydrozone **1** was obtained by recrystallization from CH<sub>3</sub>CN/EtOAc.

## 2. General procedure for Pd-catalyzed synthesis of vinylboronates

*N*-tosylhydrozone **1** (35.3 mg, 0.1 mmol), Pd<sub>2</sub>dba<sub>3</sub> (2.3 mg, 0.0025 mmol), P(2-furyl)<sub>3</sub> (4.6 mg, 0.02 mmol), Cs<sub>2</sub>CO<sub>3</sub> (65.2 mg, 0.2 mmol) were weighed in a 10 mL oven-dried reaction flask. The flask was degassed in a vacuum and backfilled with N<sub>2</sub> three times, followed by the addition of dry degassed dioxane (1.5 mL). Then, benzyl bromides **2** (0.25 mmol, 2.5 equiv) was added using a micro-syringe successively. The reaction mixture was stirred at 80 °C with an oil bath under N<sub>2</sub> for 6 h. After the reaction, the mixture was allowed to cool to room temperature and filtered through flash column chromatography on silica gel (EA). Then, the solvent was evaporated in *vacuo* and the crude product was purified by preparative thin layer chromatography on silica gel (300–400 mesh) using ethyl acetate, which afforded product alkenyl boronates **3-31**.

### 3. General procedure for Suzuki-Miyaura coupling of aryl bromides with alkenyl MIDA boronate **2**

In a 10 mL oven-dried reaction flask equipped with a stirring bar were placed with alkenyl MIDA boronate **2** (31.1 mg, 0.12 mmol, 1.2 equiv), Pd(OAc)<sub>2</sub> (1.1 mg, 0.005 mmol, 5 mol%), S-Phos (4.1 mg, 0.01 mmol, 10 mol%). The flask was degassed in a vacuum and backfilled with N<sub>2</sub> three times, followed by the addition of dry degassed dioxane (1 mL) and aryl bromides (0.1 mmol, 1 equiv). The mixture was stirred at room temperature for 15 min. Then, aq. K<sub>3</sub>PO<sub>4</sub> (3.0 M, 0.25 mL, 7.5 equiv) was added. The flask was placed in a 60 °C oil bath with stirring for 10 h. After cooling to room temperature the mixture was transferred to separatory funnel and was diluted with H<sub>2</sub>O and ethyl acetate, the mixture was shaken and the phases were separated. The aqueous phase was extracted with ethyl acetate (3 × 5 mL). The combined organic fractions were dried over Na<sub>2</sub>SO<sub>4</sub>. The organic residue after filtration was concentrated and then purified by preparative thin layer chromatography on silica gel (300–400 mesh) using PE to give the corresponding product.

### 4. Other transformations of alkenyl MIDA boronate **3**

The reaction of alkenyl MIDA boronate **3** with Olah's reagent,<sup>2</sup> *m*-CPBA,<sup>3</sup> KHF<sub>2</sub><sup>4</sup> was carried out according to the literature procedures.

### 5. Characterization data of the products

(*E*)-4-methyl-8-styryldihydro-4λ<sup>4</sup>,8λ<sup>4</sup>-[1,3,2]oxazaborolo[2,3-*b*][1,3,2]oxazaborole-2,6(3*H*,5*H*)-dione (**3**)<sup>5</sup>

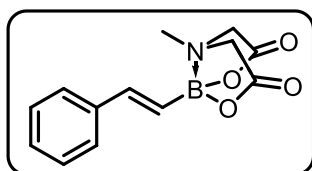

Yield: 19.7 mg (76%), white solid, *R*<sub>f</sub> = 0.26 (EA); <sup>1</sup>H NMR (400 MHz, CD<sub>3</sub>CN) δ 7.52 (d, *J* = 7.3 Hz, 2H), 7.35 (t, *J* = 7.3 Hz, 2H), 7.28 (t, *J* = 7.2 Hz, 1H), 6.95 (d, *J* = 18.2 Hz, 1H), 6.28 (d, *J* = 18.2 Hz, 1H), 3.99 (d, *J* = 17.0 Hz, 2H), 3.84 (d, *J* = 17.0 Hz, 2H), 2.81 (s, 3H); <sup>13</sup>C{<sup>1</sup>H} NMR (100 MHz, CD<sub>3</sub>CN) δ 169.0, 142.9, 138.7, 129.2, 128.6, 127.2, 62.0, 47.3.

(*E*)-4-methyl-8-(4-methylstyryl)dihydro-4 $\lambda^4$ ,8 $\lambda^4$ -[1,3,2]oxazaborolo[2,3-*b*][1,3,2]oxazaborole-2,6(3*H*,5*H*)-dione (**4**)<sup>5</sup>

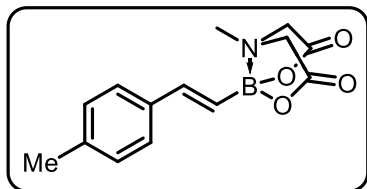

Yield: 12.1 mg (48%), white solid,  $R_f$  = 0.26 (EA);  $^1\text{H}$  NMR (400 MHz,  $\text{CD}_3\text{CN}$ )  $\delta$  7.40 (d,  $J$  = 8.1 Hz, 2H), 7.17 (d,  $J$  = 8.0 Hz, 2H), 6.90 (d,  $J$  = 18.2 Hz, 1H), 6.20 (d,  $J$  = 18.2 Hz, 1H), 3.98 (d,  $J$  = 16.9 Hz, 2H), 3.83 (d,  $J$  = 16.9 Hz, 2H), 2.80 (s, 3H), 2.32 (s, 3H);  $^{13}\text{C}$ {1H} NMR (100 MHz,  $\text{CD}_3\text{CN}$ )

$\delta$  169.1, 142.8, 138.7, 136.0, 129.8, 127.2, 62.0, 47.3, 20.8.

(*E*)-8-(4-(*tert*-butyl)styryl)-4-methyldihydro-4 $\lambda^4$ ,8 $\lambda^4$ -[1,3,2]oxazaborolo[2,3-*b*][1,3,2]oxazaborole-2,6(3*H*,5*H*)-dione (**5**)<sup>5</sup>

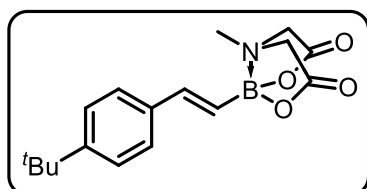

Yield: 18.4 mg (58%), white solid,  $R_f$  = 0.28 (EA);  $^1\text{H}$  NMR (400 MHz,  $\text{CD}_3\text{CN}$ )  $\delta$  7.48-7.38 (m, 4H), 6.91 (d,  $J$  = 18.2 Hz, 1H), 6.23 (d,  $J$  = 18.2 Hz, 1H), 3.98 (d,  $J$  = 17.0 Hz, 2H), 3.83 (d,  $J$  = 17.0 Hz, 2H), 2.80 (s, 3H), 1.30 (s, 9H);  $^{13}\text{C}$ {1H} NMR (100 MHz,  $\text{CD}_3\text{CN}$ )  $\delta$  169.1, 151.8, 142.7, 136.0, 130.3, 127.0, 126.0, 61.9, 47.3, 34.8, 31.4.

$\delta$  169.1, 151.8, 142.7, 136.0, 130.3, 127.0, 126.0, 61.9, 47.3, 34.8, 31.4.

(*E*)-8-(2-([1,1'-biphenyl]-4-yl)vinyl)-4-methyldihydro- $\lambda^4$ ,8 $\lambda^4$ -[1,3,2]oxazaborolo[2,3-*b*][1,3,2]oxazaborole-2,6(3*H*,5*H*)-dione (**6**)<sup>5</sup>

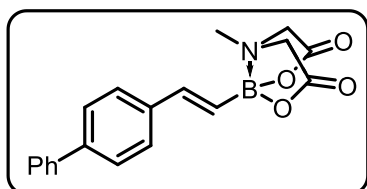

Yield: 20.7 mg (62%), white solid,  $R_f$  = 0.23 (EA);  $^1\text{H}$  NMR (400 MHz,  $\text{CD}_3\text{CN}$ )  $\delta$  7.67-7.59 (m, 6H), 7.46 (t,  $J$  = 7.5 Hz, 2H), 7.36 (t,  $J$  = 7.5 Hz, 1H), 7.00 (d,  $J$  = 18.3 Hz, 1H), 6.34 (d,  $J$  = 18.3 Hz, 1H), 4.01 (d,  $J$  = 17.0 Hz, 2H), 3.86 (d,  $J$  =

17.0 Hz, 2H), 2.83 (s, 3H);  $^{13}\text{C}$ {1H} NMR (100 MHz,  $\text{CD}_3\text{CN}$ )  $\delta$  169.1, 142.4, 141.0, 140.9, 137.9, 129.5, 128.1, 127.8, 127.6, 127.3, 62.0, 47.3.

(*E*)-4-methyl-8-(4-(trifluoromethoxy)styryl)dihydro- $\lambda^4$ ,8 $\lambda^4$ -[1,3,2]oxazaborolo[2,3-*b*][1,3,2]oxazaborole-2,6(3*H*,5*H*)-dione (**7**)

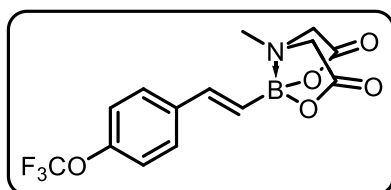

Yield: 22.1 mg (64%), colorless oil,  $R_f$  = 0.29 (EA);  $^1\text{H}$  NMR (400 MHz,  $\text{CD}_3\text{CN}$ )  $\delta$  7.60 (d,  $J$  = 8.3 Hz, 2H), 7.27 (d,  $J$  = 8.2 Hz, 2H), 6.96 (d,  $J$  = 18.2 Hz, 1H), 6.30 (d,  $J$  = 18.3 Hz, 1H), 4.00 (d,  $J$  = 17.0 Hz, 2H), 3.85 (d,  $J$  = 17.1

Hz, 2H), 2.82 (s, 3H);  $^{13}\text{C}$ {1H} NMR (100 MHz,  $\text{CD}_3\text{CN}$ )  $\delta$  169.0, 149.1, 141.3, 137.9,

128.8, 121.7, 121.1(q,  $^1J_{CF} = 255.6$  Hz), 62.1, 47.3;  $^{19}\text{F}$  NMR (471 MHz,  $\text{CD}_3\text{CN}$ )  $\delta$  -58.6 (s, 3F); HRMS (ESI,  $m/z$ ): calcd for  $\text{C}_{14}\text{H}_{17}\text{BF}_3\text{N}_2\text{O}_5$  [ $\text{M}+\text{NH}_4$ ] $^+$  361.1183, found 361.1177; IR (film): 1260, 1288, 1292, 1735, 1744, 1765, 1778  $\text{cm}^{-1}$ .

(*E*)-8-(4-methoxystyryl)-4-methyldihydro- $\lambda^4,8\lambda^4$ -[1,3,2]oxazaborolo[2,3-*b*][1,3,2]oxazaborole-2,6(3*H*,5*H*)-dione (**8**)<sup>5</sup>

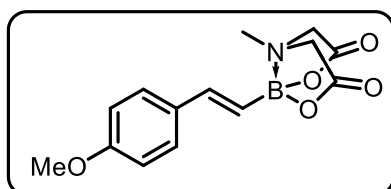

Yield: 11.0 mg (38%), white solid,  $R_f = 0.27$  (EA);  $^1\text{H}$  NMR (400 MHz,  $\text{CD}_3\text{CN}$ )  $\delta$  7.45 (d,  $J = 8.3$  Hz, 2H), 7.13-6.80 (m, 3H), 6.10 (d,  $J = 18.2$  Hz, 1H), 3.98 (d,  $J = 17.0$  Hz, 2H), 3.83 (d,  $J = 17.2$  Hz, 2H), 3.78 (s, 3H), 2.80 (s, 3H);

$^{13}\text{C}\{^1\text{H}\}$  NMR (100 MHz,  $\text{CD}_3\text{CN}$ )  $\delta$  169.1, 160.3, 142.4, 131.5, 128.5, 114.5, 61.9, 55.5, 47.2.

(*E*)-8-(4-fluorostyryl)-4-methyldihydro- $\lambda^4,8\lambda^4$ -[1,3,2]oxazaborolo[2,3-*b*][1,3,2]oxazaborole-2,6(3*H*,5*H*)-dione (**9**)<sup>6</sup>

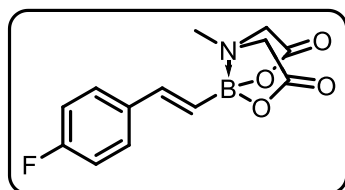

Yield: 16.7 mg (74%), colorless oil,  $R_f = 0.25$  (EA);  $^1\text{H}$  NMR (400 MHz,  $\text{CD}_3\text{CN}$ )  $\delta$  7.55-7.52 (m, 2H), 7.09 (t,  $J = 8.7$  Hz, 2H), 6.93 (d,  $J = 18.3$  Hz, 1H), 6.21 (d,  $J = 18.3$  Hz, 1H), 3.99 (d,  $J = 17.0$  Hz, 2H), 3.84 (d,  $J = 17.0$  Hz, 2H), 2.81 (s, 3H);

$^{13}\text{C}\{^1\text{H}\}$  NMR (100 MHz,  $\text{CD}_3\text{CN}$ )  $\delta$  169.0, 163.1 (d,  $J = 244.8$  Hz), 141.6, 129.0 (d,  $J = 8.0$  Hz), 115.8 (d,  $J = 22.0$  Hz), 62.0, 47.3;  $^{19}\text{F}$  NMR (471 MHz,  $\text{CD}_3\text{CN}$ )  $\delta$  -115.8 (m, 1F).

(*E*)-8-(4-chlorostyryl)-4-methyldihydro- $\lambda^4,8\lambda^4$ -[1,3,2]oxazaborolo[2,3-*b*][1,3,2]oxazaborole-2,6(3*H*,5*H*)-dione (**10**)<sup>5</sup>

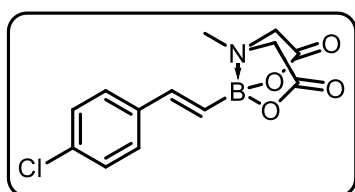

Yield: 20.9 mg (71%), colorless oil,  $R_f = 0.25$  (EA);  $^1\text{H}$  NMR (400 MHz,  $\text{CD}_3\text{CN}$ )  $\delta$  7.50 (d,  $J = 8.2$  Hz, 2H), 7.36 (d,  $J = 8.3$  Hz, 2H), 6.92 (d,  $J = 18.2$  Hz, 1H), 6.29 (d,  $J = 18.2$  Hz, 1H), 4.00 (d,  $J = 17.0$  Hz, 2H), 3.85 (d,  $J = 17.0$  Hz, 2H), 2.81 (s, 3H);

$^{13}\text{C}\{^1\text{H}\}$  NMR (100 MHz,  $\text{CD}_3\text{CN}$ )  $\delta$  169.0, 141.5, 137.5, 133.6, 129.1, 128.7, 62.0, 47.3.

(*E*)-8-(4-bromostyryl)-4-methyldihydro- $\lambda^4,8\lambda^4$ -[1,3,2]oxazaborolo[2,3-*b*][1,3,2]oxazaborole-2,6(3*H*,5*H*)-dione (**11**)<sup>5</sup>

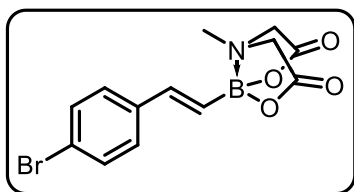

Yield: 23.0 mg (73%), white solid,  $R_f = 0.26$  (EA);  $^1\text{H}$  NMR (400 MHz,  $\text{CD}_3\text{CN}$ )  $\delta$  7.51 (d,  $J = 8.2$  Hz, 2H), 7.43 (d,  $J = 8.2$  Hz, 2H), 6.91 (d,  $J = 18.2$  Hz, 1H), 6.30 (d,  $J = 18.2$  Hz, 1H), 4.00 (d,  $J = 17.0$  Hz, 2H), 3.84 (d,  $J = 17.0$  Hz, 2H), 2.81 (s, 3H);  $^{13}\text{C}\{^1\text{H}\}$  NMR (100 MHz,  $\text{CD}_3\text{CN}$ )  $\delta$  169.0, 141.6, 137.9, 132.1, 129.0, 121.8, 62.0, 47.3.

(*E*)-4-methyl-8-(4-(trifluoromethyl)styryl)dihydro- $\lambda^4,8\lambda^4$ -[1,3,2]oxazaborolo[2,3-*b*][1,3,2]oxazaborole-2,6(3*H*,5*H*)-dione (**12**)<sup>7</sup>

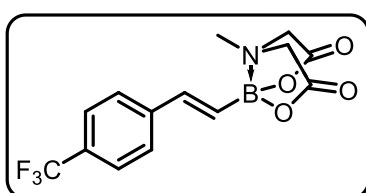

Yield: 20.6 mg (63%), white solid,  $R_f = 0.27$  (EA);  $^1\text{H}$  NMR (400 MHz,  $\text{CD}_3\text{CN}$ )  $\delta$  7.70-7.65 (m, 4H), 7.02 (d,  $J = 18.3$  Hz, 1H), 6.45 (d,  $J = 18.3$  Hz, 1H), 4.02 (d,  $J = 16.9$  Hz, 2H), 3.86 (d,  $J = 17.0$  Hz, 2H), 2.83 (s, 3H);  $^{13}\text{C}\{^1\text{H}\}$  NMR (100 MHz,  $\text{CD}_3\text{CN}$ )  $\delta$  169.0, 142.5, 141.4, 130.3, 129.5 (q,  $J = 32.0$  Hz), 126.0 (q,  $J = 4.0$  Hz), 125.1 (q,  $J = 271.7$  Hz), 62.1, 47.4;  $^{19}\text{F}$  NMR (471 MHz,  $\text{CD}_3\text{CN}$ )  $\delta$  -63.0 (s, 3F).

(*E*)-4-methyl-8-(4-nitrostyryl)dihydro- $\lambda^4,8\lambda^4$ -[1,3,2]oxazaborolo[2,3-*b*][1,3,2]oxazaborole-2,6(3*H*,5*H*)-dione (**13**)

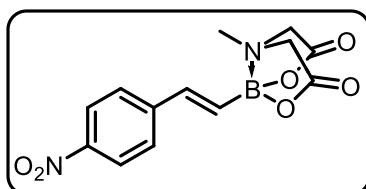

Yield: 20.3 mg (67%), white solid, m.p. = 142-145 °C,  $R_f = 0.22$  (EA);  $^1\text{H}$  NMR (400 MHz,  $\text{CD}_3\text{CN}$ )  $\delta$  8.19 (d,  $J = 8.8$  Hz, 2H), 7.71 (d,  $J = 8.5$  Hz, 2H), 7.06 (d,  $J = 18.3$  Hz, 1H), 6.54 (d,  $J = 18.3$  Hz, 1H), 4.03 (d,  $J = 17.1$  Hz, 2H), 3.87 (d,  $J = 17.1$  Hz, 2H), 2.84 (s, 3H);  $^{13}\text{C}\{^1\text{H}\}$  NMR (100 MHz,  $\text{CD}_3\text{CN}$ )  $\delta$  169.2, 148.1, 145.2, 141.0, 128.2, 124.6, 62.4, 47.6; HRMS (ESI,  $m/z$ ): calcd for  $\text{C}_{13}\text{H}_{14}\text{BN}_2\text{O}_6$  [ $\text{M}+\text{H}$ ]<sup>+</sup> 305.0945, found 305.0939; IR (film): 1309, 1345, 1516, 1752, 1765, 1778  $\text{cm}^{-1}$ .

(*E*)-4-(2-(4-methyl-2,6-dioxotetrahydro-2*H*- $\lambda^4,8\lambda^4$ -[1,3,2]oxazaborolo[2,3-*b*][1,3,2]oxazaborol-8-yl)vinyl)benzotrile (**14**)<sup>8</sup>

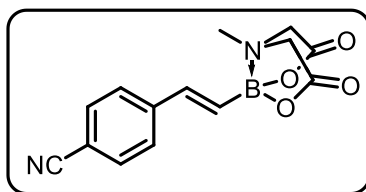

Yield: 20.1 mg (71%), colorless oil,  $R_f = 0.21$  (EA);  $^1\text{H}$  NMR (400 MHz,  $\text{CD}_3\text{CN}$ )  $\delta$  7.71-7.64 (m, 4H), 7.00 (d,  $J = 18.2$  Hz, 1H), 6.47 (d,  $J = 18.2$  Hz, 1H), 4.02 (d,  $J = 17.0$  Hz, 2H), 3.86 (d,  $J = 17.0$  Hz, 2H), 2.82 (s, 3H);  $^{13}\text{C}\{^1\text{H}\}$  NMR (100 MHz,  $\text{CD}_3\text{CN}$ )  $\delta$  169.0, 143.0, 141.2, 133.1, 127.8, 119.4, 111.4, 62.1, 47.4.

methyl (*E*)-4-(2-(4-methyl-2,6-dioxotetrahydro-2*H*- $\lambda^4,8\lambda^4$ -[1,3,2]oxazaborolo[2,3-*b*][1,3,2]

oxazaborol-8-yl)vinyl)benzoate (**15**)<sup>8</sup>

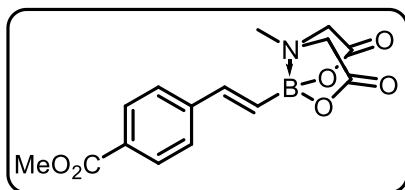

Yield: 20.2 mg (64%), white solid,  $R_f = 0.27$  (EA);  $^1\text{H}$  NMR (400 MHz,  $\text{CD}_3\text{CN}$ )  $\delta$  7.97 (d,  $J = 8.4$  Hz, 2H), 7.61 (d,  $J = 8.4$  Hz, 2H), 7.01 (d,  $J = 18.3$  Hz, 1H), 6.44 (d,  $J = 18.2$  Hz, 1H), 4.01 (d,  $J = 17.0$  Hz, 2H), 3.87 (d,  $J = 17.0$  Hz, 2H), 3.86 (s, 3H), 2.83 (s, 3H);  $^{13}\text{C}$  {1H} NMR (100 MHz,  $\text{CD}_3\text{CN}$ )  $\delta$  169.0, 167.0, 143.1, 141.80, 130.2, 130.1, 127.3, 62.1, 52.2, 47.3.

(*E*)-8-(2-fluorostyryl)-4-methyldihydro- $\lambda^4,8\lambda^4$ -[1,3,2]oxazaborolo[2,3-*b*][1,3,2]oxazaborole-2,6(3*H*,5*H*)-dione (**16**)

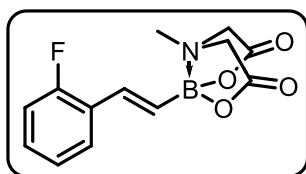

Yield: 18.1 mg (65%), white solid, m.p. = 139-142 °C,  $R_f = 0.29$  (EA);  $^1\text{H}$  NMR (400 MHz,  $\text{CD}_3\text{CN}$ )  $\delta$  7.66 (td,  $J = 7.8, 1.7$  Hz, 1H), 7.34-7.26 (m, 1H), 7.21-7.15 (m, 1H), 7.14-7.06 (m, 2H), 6.37 (d,  $J = 18.4$  Hz, 1H), 4.01 (d,  $J = 17.0$  Hz, 2H), 3.85 (d,  $J = 17.0$  Hz, 2H), 2.83 (s, 3H);  $^{13}\text{C}$  {1H} NMR (100 MHz,  $\text{CD}_3\text{CN}$ )  $\delta$  169.0, 160.8 (d,  $J = 247.7$  Hz), 134.4 (d,  $J = 4.4$  Hz), 130.2 (d,  $J = 8.6$  Hz), 128.0 (d,  $J = 3.5$  Hz), 125.0 (d,  $J = 3.3$  Hz), 116.2 (d,  $J = 22.3$  Hz), 62.1, 47.4;  $^{19}\text{F}$  NMR (471 MHz,  $\text{CD}_3\text{CN}$ )  $\delta$  -120.8 (m, 1F); HRMS (ESI,  $m/z$ ): calcd for  $\text{C}_{13}\text{H}_{17}\text{BFN}_2\text{O}_4$  [ $\text{M}+\text{NH}_4$ ]<sup>+</sup> 295.1265, found 295.1260; IR (film): 1032, 1763, 1779, 2035  $\text{cm}^{-1}$ .

(*E*)-8-(2-chlorostyryl)-4-methyldihydro- $\lambda^4,8\lambda^4$ -[1,3,2]oxazaborolo[2,3-*b*][1,3,2]oxazaborole-2,6(3*H*,5*H*)-dione (**17**)<sup>8</sup>

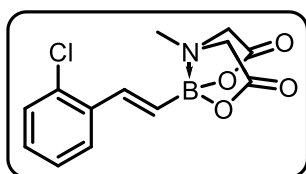

Yield: 17.2 mg (59%), white solid,  $R_f = 0.27$  (EA);  $^1\text{H}$  NMR (400 MHz,  $\text{CD}_3\text{CN}$ )  $\delta$  7.73 (dd,  $J = 7.7, 1.7$  Hz, 1H), 7.40 (dd,  $J = 7.8, 1.4$  Hz, 1H), 7.35-7.23 (m, 3H), 6.32 (d,  $J = 18.1$  Hz, 1H), 4.02 (d,  $J = 17.0$  Hz, 2H), 3.86 (d,  $J = 17.0$  Hz, 2H), 2.84 (s, 3H);  $^{13}\text{C}$  {1H} NMR (100 MHz,  $\text{CD}_3\text{CN}$ )  $\delta$  169.0, 138.4, 136.5, 133.3, 130.1, 129.9, 127.8, 127.8, 62.1, 47.4.

(*E*)-8-(2-bromostyryl)-4-methyldihydro- $\lambda^4,8\lambda^4$ -[1,3,2]oxazaborolo[2,3-*b*][1,3,2]oxazaborole-2,6(3*H*,5*H*)-dione (**18**)<sup>9</sup>

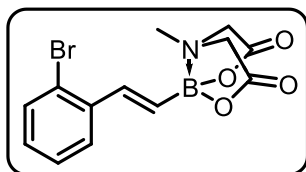

Yield: 22.4 mg (66%), colorless oil,  $R_f = 0.28$  (EA);  $^1\text{H}$  NMR (400 MHz,  $\text{CD}_3\text{CN}$ )  $\delta$  7.71 (dd,  $J = 7.8, 1.7$  Hz, 1H), 7.59 (dd,  $J = 8.0, 1.3$  Hz, 1H), 7.41-7.33 (m, 1H), 7.28-7.15 (m, 2H), 6.27 (d,  $J =$

18.0 Hz, 1H), 4.02 (d,  $J = 17.0$  Hz, 2H), 3.86 (d,  $J = 17.0$  Hz, 2H), 2.84 (s, 3H);  $^{13}\text{C}\{1\text{H}\}$  NMR (100 MHz,  $\text{CD}_3\text{CN}$ )  $\delta$  169.0, 141.1, 138.3, 133.4, 130.2, 128.4, 128.0, 123.8, 62.1, 47.4.

(*E*)-4-methyl-8-(2-methylstyryl)dihydro- $\lambda^4,8\lambda^4$ -[1,3,2]oxazaborolo[2,3-*b*][1,3,2]oxazaborole-2,6(3*H*,5*H*)-dione (**19**)<sup>5</sup>

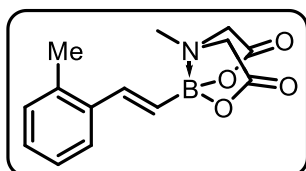

Yield: 8.4 mg (31%), white solid,  $R_f = 0.26$  (EA);  $^1\text{H}$  NMR (400 MHz,  $\text{CD}_3\text{CN}$ )  $\delta$  7.56 (d,  $J = 4.6$  Hz, 1H), 7.21-7.17 (m, 4H), 6.15 (d,  $J = 18.1$  Hz, 1H), 4.00 (d,  $J = 17.0$  Hz, 2H), 3.85 (d,  $J = 17.0$  Hz, 2H), 2.83 (s, 3H), 2.36 (s, 3H);  $^{13}\text{C}\{1\text{H}\}$  NMR (100 MHz,  $\text{CD}_3\text{CN}$ )  $\delta$  169.0, 140.6, 137.9, 136.2, 130.8, 128.4, 126.7, 126.1, 62.0, 47.3, 19.4.

(*E*)-8-(3-fluorostyryl)-4-methyldihydro- $\lambda^4,8\lambda^4$ -[1,3,2]oxazaborolo[2,3-*b*][1,3,2]oxazaborole-2,6(3*H*,5*H*)-dione (**20**)<sup>10</sup>

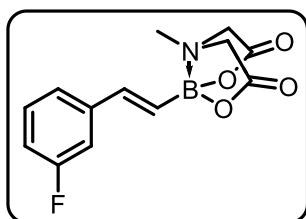

Yield: 14.8 mg (53%), white solid,  $R_f = 0.28$  (EA);  $^1\text{H}$  NMR (400 MHz,  $\text{CD}_3\text{CN}$ )  $\delta$  7.43-7.22 (m, 3H), 7.02 (td,  $J = 8.2, 7.8, 2.4$  Hz, 1H), 6.94 (d,  $J = 18.2$  Hz, 1H), 6.33 (d,  $J = 18.2$  Hz, 1H), 4.01 (d,  $J = 17.0$  Hz, 2H), 3.85 (d,  $J = 17.0$  Hz, 2H), 2.82 (s, 3H);  $^{13}\text{C}\{1\text{H}\}$  NMR (100 MHz,  $\text{CD}_3\text{CN}$ )  $\delta$  169.0, 163.7 (d,  $J = 243.1$  Hz), 141.6 (d,  $J = 2.2$  Hz), 130.9 (d,  $J = 8.7$  Hz), 123.4 (d,  $J = 2.9$  Hz), 115.1 (d,  $J = 21.6$  Hz), 113.3 (d,  $J = 22.1$  Hz), 62.0, 47.3;  $^{19}\text{F}$  NMR (471 MHz,  $\text{CD}_3\text{CN}$ )  $\delta$  -115.4 (m, 1F).

(*E*)-8-(3-chlorostyryl)-4-methyldihydro- $\lambda^4,8\lambda^4$ -[1,3,2]oxazaborolo[2,3-*b*][1,3,2]oxazaborole-2,6(3*H*,5*H*)-dione (**21**)<sup>5</sup>

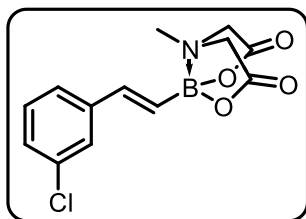

Yield: 19.6 mg (67%), white solid,  $R_f = 0.30$  (EA);  $^1\text{H}$  NMR (400 MHz,  $\text{CD}_3\text{CN}$ )  $\delta$  7.55 (t,  $J = 1.9$  Hz, 1H), 7.49-7.41 (m, 1H), 7.34 (t,  $J = 7.7$  Hz, 1H), 7.28 (ddd,  $J = 7.9, 2.1, 1.3$  Hz, 1H), 6.92 (d,  $J = 18.2$  Hz, 1H), 6.34 (d,  $J = 18.2$  Hz, 1H), 4.00 (d,  $J = 17.0$  Hz, 2H), 3.84 (d,  $J = 16.9$  Hz, 2H), 2.81 (s, 3H);  $^{13}\text{C}\{1\text{H}\}$  NMR (100 MHz,  $\text{CD}_3\text{CN}$ )  $\delta$  169.0, 141.3, 140.9, 134.6, 130.7, 128.3, 126.9, 125.8, 62.0, 47.3.

(*E*)-8-(3-bromostyryl)-4-methyldihydro- $\lambda^4,8\lambda^4$ -[1,3,2]oxazaborolo[2,3-*b*][1,3,2]oxazaborole-2,6(3*H*,5*H*)-dione (**22**)<sup>5</sup>



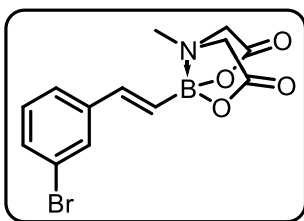

Yield: 25.1 mg (74%), white solid,  $R_f = 0.25$  (EA);  $^1\text{H}$  NMR (400 MHz,  $\text{CD}_3\text{CN}$ )  $\delta$  7.71 (t,  $J = 1.9$  Hz, 1H), 7.48 (dt,  $J = 7.7, 1.4$  Hz, 1H), 7.43 (ddd,  $J = 7.9, 2.0, 1.0$  Hz, 1H), 7.27 (t,  $J = 7.8$  Hz, 1H), 6.90 (d,  $J = 18.2$  Hz, 1H), 6.33 (d,  $J = 18.2$  Hz, 1H), 4.00 (d,  $J = 17.0$  Hz, 2H), 3.84 (d,  $J = 17.0$  Hz, 2H), 2.81 (s, 3H);  $^{13}\text{C}\{1\text{H}\}$  NMR (100 MHz,  $\text{CD}_3\text{CN}$ )  $\delta$  169.0, 141.2, 141.1, 131.2, 131.0, 129.8, 126.2, 122.8, 62.0, 47.3.

(*E*)-3-(2-(4-methyl-2,6-dioxotetrahydro-2*H*- $\lambda^4,8\lambda^4$ -[1,3,2]oxazaborolo[2,3-*b*][1,3,2]oxazaborole-8-yl)vinyl)benzonitrile (**23**)

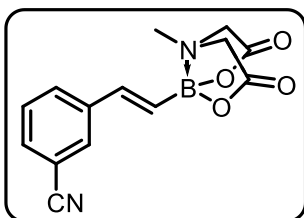

Yield: 17.9 mg (63%), colorless oil,  $R_f = 0.23$  (EA);  $^1\text{H}$  NMR (400 MHz,  $\text{CD}_3\text{CN}$ )  $\delta$  7.88 (s, 1H), 7.79 (d,  $J = 7.9$  Hz, 1H), 7.62 (d,  $J = 7.6$  Hz, 1H), 7.51 (t,  $J = 7.7$  Hz, 1H), 6.96 (d,  $J = 18.2$  Hz, 1H), 6.41 (d,  $J = 18.3$  Hz, 1H), 4.02 (d,  $J = 17.0$  Hz, 2H), 3.85 (d,  $J = 17.1$  Hz, 2H), 2.82 (s, 3H);  $^{13}\text{C}\{1\text{H}\}$  NMR (100 MHz,  $\text{CD}_3\text{CN}$ )  $\delta$  169.0, 140.6, 131.9, 131.6, 130.8, 130.2, 125.7, 119.3, 113.0, 62.1, 47.3; HRMS (ESI,  $m/z$ ): calcd for  $\text{C}_{14}\text{H}_{14}\text{BN}_2\text{O}_4$  [ $\text{M}+\text{H}$ ] $^+$  285.1047, found 285.1041; IR (film): 1121, 1292, 1459, 1754, 1765, 2232  $\text{cm}^{-1}$ .

(*E*)-4-methyl-8-(3-methylstyryl)dihydro- $\lambda^4,8\lambda^4$ -[1,3,2]oxazaborolo[2,3-*b*][1,3,2]oxazaborole-2,6(3*H*,5*H*)-dione (**24**)<sup>5</sup>

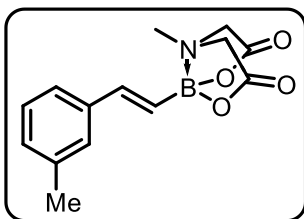

Yield: 17.0 mg (62%), white solid,  $R_f = 0.30$  (EA);  $^1\text{H}$  NMR (400 MHz,  $\text{CD}_3\text{CN}$ )  $\delta$  7.37-7.28 (m, 2H), 7.23 (t,  $J = 7.5$  Hz, 1H), 7.10 (d,  $J = 7.2$  Hz, 1H), 6.91 (d,  $J = 18.2$  Hz, 1H), 6.26 (d,  $J = 18.2$  Hz, 1H), 3.99 (d,  $J = 17.0$  Hz, 2H), 3.84 (d,  $J = 17.0$  Hz, 2H), 2.81 (s, 3H), 2.33 (s, 3H);  $^{13}\text{C}\{1\text{H}\}$  NMR (100 MHz,  $\text{CD}_3\text{CN}$ )  $\delta$  169.0, 143.0, 138.8, 138.7, 129.3, 129.0, 127.9, 124.3, 62.0, 47.3, 21.0.

(*E*)-8-(3-methoxystyryl)-4-methyldihydro- $\lambda^4,8\lambda^4$ -[1,3,2]oxazaborolo[2,3-*b*][1,3,2]oxazaborole-2,6(3*H*,5*H*)-dione (**25**)<sup>10</sup>

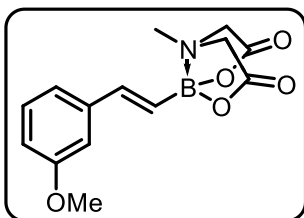

Yield: 19.9 mg (69%), white solid,  $R_f = 0.26$  (EA);  $^1\text{H}$  NMR (400 MHz,  $\text{CD}_3\text{CN}$ )  $\delta$  7.26 (t,  $J = 7.9$  Hz, 1H), 7.16-7.05 (m, 2H), 6.92 (d,  $J = 18.2$  Hz, 1H), 6.85 (dd,  $J = 8.0, 2.5$  Hz, 1H), 6.29 (d,  $J = 18.2$  Hz, 1H), 4.00 (d,  $J = 17.0$  Hz, 2H), 3.84 (d,  $J = 17.1$  Hz, 2H),

3.79 (s, 3H), 2.81 (s, 3H);  $^{13}\text{C}\{^1\text{H}\}$  NMR (100 MHz,  $\text{CD}_3\text{CN}$ )  $\delta$  169.0, 160.6, 142.8, 140.2, 130.2, 119.7, 114.2, 112.4, 62.0, 55.4, 47.3.

(*E*)-4-methyl-8-(2-(naphthalen-2-yl)vinyl)dihydro- $\lambda^4,8\lambda^4$ -[1,3,2]oxazaborolo[2,3-*b*][1,3,2]oxazaborole-2,6(3*H*,5*H*)-dione (**26**)<sup>10</sup>

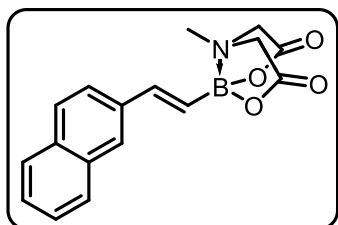

Yield: 19.2 mg (62%), white solid,  $R_f = 0.30$  (EA);  $^1\text{H}$  NMR (400 MHz,  $\text{CD}_3\text{CN}$ )  $\delta$  7.96-7.82 (m, 4H), 7.77 (d,  $J = 8.6$  Hz, 1H), 7.49 (dq,  $J = 6.3, 4.2, 2.4$  Hz, 2H), 7.12 (d,  $J = 18.2$  Hz, 1H), 6.42 (d,  $J = 18.2$  Hz, 1H), 4.02 (d,  $J = 17.0$  Hz, 2H), 3.87 (d,  $J = 17.1$  Hz, 2H), 2.85 (s, 3H);  $^{13}\text{C}\{^1\text{H}\}$  NMR (100 MHz,  $\text{CD}_3\text{CN}$ )  $\delta$  169.1, 142.9, 136.2, 134.1, 133.8, 130.3, 128.7, 128.6, 128.2, 127.4, 127.0, 126.7, 124.2, 62.1, 47.3.

(*E*)-4-methyl-8-(2-(thiophen-3-yl)vinyl)dihydro- $\lambda^4,8\lambda^4$ -[1,3,2]oxazaborolo[2,3-*b*][1,3,2]oxazaborole-2,6(3*H*,5*H*)-dione (**27**)

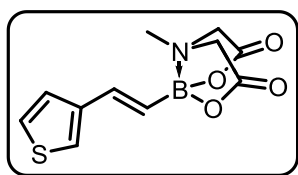

Yield: 13.1 mg (49%), colorless oil,  $R_f = 0.27$  (EA);  $^1\text{H}$  NMR (400 MHz,  $\text{CD}_3\text{CN}$ )  $\delta$  7.36-7.35 (m, 3H), 6.95 (d,  $J = 18.2$  Hz, 1H), 6.07 (d,  $J = 18.2$  Hz, 1H), 3.98 (d,  $J = 17.0$  Hz, 2H), 3.83 (d,  $J = 16.9$  Hz, 2H), 2.81 (s, 3H);  $^{13}\text{C}\{^1\text{H}\}$  NMR (100 MHz,  $\text{CD}_3\text{CN}$ )  $\delta$  169.0, 142.33, 136.9, 130.3, 126.9, 125.8, 123.9, 61.9, 47.3; HRMS (ESI,  $m/z$ ): calcd for  $\text{C}_{11}\text{H}_{13}\text{BNO}_4\text{S}$  [ $\text{M}+\text{H}$ ]<sup>+</sup> 266.0658, found 266.0653; IR (film): 1028, 1295, 1343, 1769  $\text{cm}^{-1}$ .

(*E*)-8-(2-bromo-5-fluorostyryl)-4-methyldihydro- $\lambda^4,8\lambda^4$ -[1,3,2]oxazaborolo[2,3-*b*][1,3,2]oxazaborole-2,6(3*H*,5*H*)-dione (**28**)

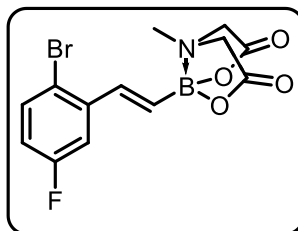

Yield: 22.1 mg (62%), colorless oil,  $R_f = 0.29$  (EA);  $^1\text{H}$  NMR (400 MHz,  $\text{CD}_3\text{CN}$ )  $\delta$  7.59 (dd,  $J = 8.8, 5.4$  Hz, 1H), 7.47 (dd,  $J = 10.2, 3.1$  Hz, 1H), 7.25-7.10 (m, 1H), 6.99 (td,  $J = 8.4, 3.0$  Hz, 1H), 6.32 (d,  $J = 18.1$  Hz, 1H), 4.03 (d,  $J = 17.0$  Hz, 2H), 3.87 (d,  $J = 17.1$  Hz, 2H), 2.84 (s, 3H);  $^{13}\text{C}\{^1\text{H}\}$  NMR (100 MHz,  $\text{CD}_3\text{CN}$ )  $\delta$  168.9, 162.8 (d,  $J = 244.7$  Hz), 150.2 (d,  $J = 8.3$  Hz), 140.1, 134.9 (d,  $J = 8.3$  Hz), 124.0 (d,  $J = 22.1$  Hz), 117.1 (d,  $J = 23.1$  Hz), 114.5 (d,  $J = 23.8$  Hz), 62.1, 47.4;  $^{19}\text{F}$  NMR (471 MHz,  $\text{CD}_3\text{CN}$ )  $\delta$  -116.3 (m, 1F); HRMS (ESI,  $m/z$ ): calcd for  $\text{C}_{13}\text{H}_{13}\text{BBrFNO}_4$  [ $\text{M}+\text{H}$ ]<sup>+</sup> 356.0105, found 356.0100; IR (film): 1298, 1460, 1338, 1467, 1754, 1765, 1777  $\text{cm}^{-1}$ .

(*E*)-8-(3,5-dichlorostyryl)-4-methyldihydro- $\lambda^4,8\lambda^4$ -[1,3,2]oxazaborolo[2,3-*b*][1,3,2]oxazaborole-2,6(3*H*,5*H*)-dione (**29**)

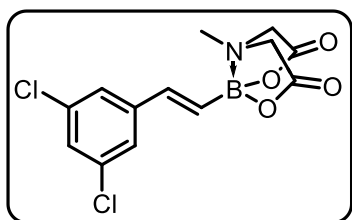

Yield: 24.4 mg (75%), colorless oil,  $R_f = 0.29$  (EA);  $^1\text{H NMR}$  (400 MHz,  $\text{CD}_3\text{CN}$ )  $\delta$  7.48 (d,  $J = 1.8$  Hz, 2H), 7.35 (t,  $J = 1.9$  Hz, 1H), 6.87 (d,  $J = 18.2$  Hz, 1H), 6.39 (d,  $J = 18.2$  Hz, 1H), 4.01 (d,  $J = 17.0$  Hz, 2H), 3.85 (d,  $J = 17.1$  Hz, 2H), 2.82 (s, 3H);  $^{13}\text{C}\{^1\text{H}\}$  NMR (100 MHz,  $\text{CD}_3\text{CN}$ )  $\delta$  168.9, 150.3, 142.2, 139.9, 135.4, 127.8, 125.7, 62.1, 47.4; HRMS (ESI,  $m/z$ ): calcd for  $\text{C}_{13}\text{H}_{13}\text{BCl}_2\text{NO}_4$  [ $\text{M}+\text{H}$ ] $^+$  328.0315, found 328.0309; IR (film): 1034, 1113, 1292, 1295, 1562, 1748, 1766  $\text{cm}^{-1}$ .

(*E*)-8-(3,5-bis(trifluoromethyl)styryl)-4-methyldihydro- $\lambda^4,8\lambda^4$ -[1,3,2]oxazaborolo[2,3-*b*][1,3,2]oxazaborole-2,6(3*H*,5*H*)-dione (**30**)

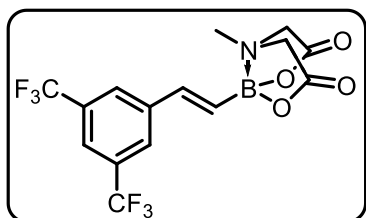

Yield: 27.7 mg (70%), colorless oil,  $R_f = 0.32$  (EA);  $^1\text{H NMR}$  (400 MHz,  $\text{CD}_3\text{CN}$ )  $\delta$  8.08 (s, 2H), 7.88 (s, 1H), 7.08 (d,  $J = 18.2$  Hz, 1H), 6.56 (d,  $J = 18.2$  Hz, 1H), 4.04 (d,  $J = 17.1$  Hz, 2H), 3.87 (d,  $J = 17.0$  Hz, 2H), 2.84 (s, 3H);  $^{13}\text{C}\{^1\text{H}\}$  NMR (100 MHz,  $\text{CD}_3\text{CN}$ )  $\delta$  168.9, 150.3 (d,  $J = 8.1$  Hz), 141.2, 139.7, 131.82 (q,  $J = 33.3$  Hz), 127.51, 124.20 (q,  $J = 271.9$  Hz), 121.74 (q,  $J = 3.8$  Hz), 62.1, 47.4;  $^{19}\text{F NMR}$  (471 MHz,  $\text{CD}_3\text{CN}$ )  $\delta$  -63.4 (s, 6F); HRMS (ESI,  $m/z$ ): calcd for  $\text{C}_{15}\text{H}_{13}\text{BF}_6\text{NO}_4$  [ $\text{M}+\text{H}$ ] $^+$  396.0842, found 396.0836; IR (film): 1006, 1034, 1130, 1170, 1376, 1462, 1749, 1765  $\text{cm}^{-1}$ .

(*E*)-8-(3,5-dimethylstyryl)-4-methyldihydro- $\lambda^4,8\lambda^4$ -[1,3,2]oxazaborolo[2,3-*b*][1,3,2]oxazaborole-2,6(3*H*,5*H*)-dione (**31**)

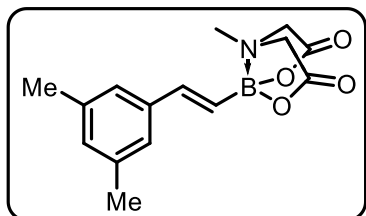

Yield: 12.1 mg (42%), colorless oil,  $R_f = 0.32$  (EA);  $^1\text{H NMR}$  (400 MHz,  $\text{CD}_3\text{CN}$ )  $\delta$  7.14-7.11 (m, 2H), 6.94 (s, 1H), 6.86 (d,  $J = 18.2$  Hz, 1H), 6.23 (d,  $J = 18.3$  Hz, 1H), 3.98 (d,  $J = 16.9$  Hz, 2H), 3.83 (d,  $J = 16.9$  Hz, 2H), 2.80 (s, 3H), 2.28 (s, 6H);  $^{13}\text{C}\{^1\text{H}\}$  NMR (100 MHz,  $\text{CD}_3\text{CN}$ )  $\delta$  169.1, 143.2, 138.6, 130.2, 125.1, 62.0, 47.3, 20.9; HRMS (ESI,  $m/z$ ): calcd for  $\text{C}_{15}\text{H}_{19}\text{BNO}_4$  [ $\text{M}+\text{H}$ ] $^+$  288.1407, found 288.1402; IR (film): 1044, 1400, 1510, 1624, 1772, 1777  $\text{cm}^{-1}$ .

(*E*)-1,2-diphenylethene (**32**)<sup>11</sup>

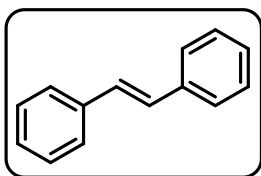

Yield: 18.0 mg (100%, 0.1 mmol scale), white solid; <sup>1</sup>H NMR (400 MHz, CDCl<sub>3</sub>) δ 7.51 (d, *J* = 7.5 Hz, 4H), 7.35 (t, *J* = 7.5 Hz, 4H), 7.25 (t, *J* = 7.5 Hz, 2H), 7.11 (s, 2H); <sup>13</sup>C{<sup>1</sup>H} NMR (100 MHz, CDCl<sub>3</sub>) δ 137.4, 128.7, 127.7, 126.6.

(*E*)-2-styrylfuran (**33**)<sup>12</sup>

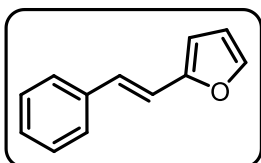

Yield: 9.5 mg (56%, 0.1 mmol scale), white solid; <sup>1</sup>H NMR (400 MHz, CDCl<sub>3</sub>) δ 7.46 (d, *J* = 7.6 Hz, 2H), 7.40 (s, 1H), 7.34 (t, *J* = 7.5 Hz, 2H), 7.28-7.20 (m, 1H), 7.04 (d, *J* = 16.3 Hz, 1H), 6.90 (d, *J* = 16.3 Hz, 1H), 6.51-6.30 (m, 2H); <sup>13</sup>C{<sup>1</sup>H} NMR (100 MHz, CDCl<sub>3</sub>) δ 153.3, 142.2, 137.0, 128.7, 127.6, 127.2, 126.4, 116.6, 111.7, 108.6.

(*E*)-3-styrylthiophene (**34**)<sup>13</sup>

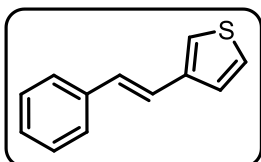

Yield: 15.7 mg (84%, 0.1 mmol scale), white solid; <sup>1</sup>H NMR (400 MHz, CDCl<sub>3</sub>) δ 7.47 (d, *J* = 7.7 Hz, 2H), 7.36-7.31 (m, 4H), 7.29-7.21 (m, 2H), 7.12 (d, *J* = 16.3 Hz, 1H), 6.95 (d, *J* = 16.2 Hz, 1H); <sup>13</sup>C{<sup>1</sup>H} NMR (100 MHz, CDCl<sub>3</sub>) δ 140.2, 137.4, 132.9, 128.7, 127.5, 126.3, 126.2, 125.0, 122.9, 122.4.

8-(2,2-difluoro-1-phenylethyl)-4-methyldihydro-4λ<sup>4</sup>,8λ<sup>4</sup>-[1,3,2]oxazaborolo[2,3-*b*][1,3,2]oxazaborole-2,6(3*H*,5*H*)-dione (**35**)<sup>14</sup>

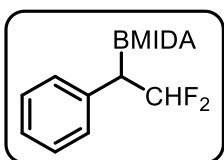

Yield: 18.5 mg (62%, 0.1 mmol scale), white solid; <sup>1</sup>H NMR (400 MHz, acetone-*d*<sub>6</sub>) δ 7.40 (d, *J* = 7.5 Hz, 2H), 7.30 (t, *J* = 7.5 Hz, 2H), 7.23 (t, *J* = 7.2 Hz, 1H), 6.23 (td, *J* = 57.0, 4.7 Hz, 1H), 4.29 (d, *J* = 17.0 Hz, 1H), 4.22 (d, *J* = 17.0 Hz, 1H), 4.09 (d, *J* = 17.1 Hz, 1H), 3.57 (d, *J* = 17.0 Hz, 1H), 3.11 (s, 3H), 3.07-2.92 (m, 1H); <sup>13</sup>C{<sup>1</sup>H} NMR (100 MHz, Acetone-*d*<sub>6</sub>) δ 168.2, 137.2 (d, *J* = 8.2 Hz), 131.2, 129.0, 127.1, 121.2 (d, *J* = 241.9, 239.9 Hz), 63.4, 63.0, 46.9 (d, *J* = 1.6 Hz).

4-methyl-8-(3-phenyloxiran-2-yl)dihydro-4λ<sup>4</sup>,8λ<sup>4</sup>-[1,3,2]oxazaborolo[2,3-*b*][1,3,2]oxazaborole-2,6(3*H*,5*H*)-dione (**36**)<sup>3</sup>

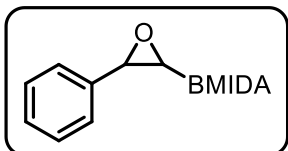

Yield: 64.4 mg (78%, 0.3 mmol scale), white solid; <sup>1</sup>H NMR (400 MHz, acetone-*d*<sub>6</sub>) δ 7.36-7.30 (m, 5H), 4.35 (d, *J* = 17.2 Hz, 1H), 4.28 (d, *J* = 16.8 Hz, 1H), 4.18 (d, *J* = 17.2 Hz, 1H), 4.04 (d, *J* = 16.7 Hz, 1H), 3.81 (s, 1H), 3.34 (s, 3H), 2.46 (s, 1H); <sup>13</sup>C{<sup>1</sup>H} NMR (100 MHz, acetone-*d*<sub>6</sub>) δ 168.6, 167.5, 139.3, 128.4, 127.8, 125.6, 62.1, 62.0, 55.7, 46.2.

2-(4-methyl-2,6-dioxotetrahydro-2*H*-4 $\lambda^4$ ,8 $\lambda^4$ -[1,3,2]oxazaborolo[2,3-*b*][1,3,2]oxazaborol-8-yl)-2-phenylacetaldehyde (**37**)<sup>3</sup>

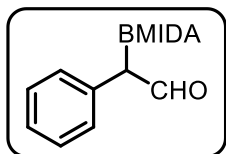

Yield: 27.0 mg (98%, 0.1 mmol scale), white solid; <sup>1</sup>H NMR (400 MHz, acetone-*d*<sub>6</sub>)  $\delta$  9.82 (d, *J* = 2.3 Hz, 1H), 7.38-7.32 (m, 4H), 7.27-7.22 (m, 1H), 4.30 (d, *J* = 13.0 Hz, 1H), 4.26 (d, *J* = 13.1 Hz, 1H), 4.15 (d, *J* = 16.9 Hz, 1H), 3.75 (d, *J* = 5.6 Hz, 1H), 3.72 (s, 1H), 3.19 (s, 3H); <sup>13</sup>C{<sup>1</sup>H} NMR (100 MHz, acetone-*d*<sub>6</sub>)  $\delta$  203.5, 167.5, 136.5, 129.8, 128.5, 126.2, 62.8, 62.5, 46.3.

(*E*)-trifluoro(styryl)- $\lambda^4$ -borane, potassium salt (**38**)<sup>4</sup>

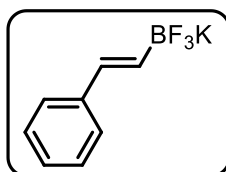

Yield: 60.4 mg (58%, 0.5 mmol scale), white solid; <sup>1</sup>H NMR (400 MHz, acetone-*d*<sub>6</sub>)  $\delta$  7.36-7.07 (m, 5H), 6.67 (d, *J* = 18.2 Hz, 1H), 6.33 (d, *J* = 18.5 Hz, 1H); <sup>13</sup>C{<sup>1</sup>H} NMR (100 MHz, acetone-*d*<sub>6</sub>)  $\delta$  141.0, 133.9, 128.1, 125.7, 125.6.

(*E*)-4,4,5,5-tetramethyl-2-styryl-1,3,2-dioxaborolane (**39**)<sup>4</sup>

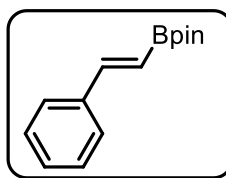

Yield: 9.1 mg (40%, 0.1 mmol scale), colorless liquid; <sup>1</sup>H NMR (400 MHz, CDCl<sub>3</sub>)  $\delta$  7.53-7.46 (m, 2H), 7.40 (d, *J* = 18.4 Hz, 1H), 7.32 (dt, *J* = 12.3, 7.0 Hz, 3H), 6.17 (d, *J* = 18.4 Hz, 1H), 1.32 (s, 12H); <sup>13</sup>C{<sup>1</sup>H} NMR (100 MHz, CDCl<sub>3</sub>)  $\delta$  149.5, 137.5, 128.9, 128.6, 127.1, 83.4, 24.8.

## 6. References

- 1 Y. M. Ivon, I. V. Mazurenko, Y. O. Kuchkovska, Z. V. Voitenko, O. O. Grygorenko, *Angew. Chem., Int. Ed.*, 2020, **59**, 18016-18022.
- 2 W.-X. Lv, Q. Li, J.-L. Li, Z. Li, E. Lin, D.-H. Tan, Y.-H. Cai, W.-X. Fan, H. Wang, *Angew. Chem., Int. Ed.*, 2018, **57**, 16544-16548.
- 3 Z. He, A. K. Yudin, *J. Am. Chem. Soc.*, 2011, **133**, 13770-13773.
- 4 Q. I. Churches, J. F. Hooper, C. A. Hutton, *J. Org. Chem.*, 2015, **80**, 5428-5435.
- 5 W.-Z. Lv, Y.-F. Zeng, Q. Li, Y. Chen, D.-H. Tan, L. Yang, H. Wang, *Angew. Chem., Int. Ed.*, 2016, **55**, 10069-10073.
- 6 J. Li, M. D. Burke, *J. Am. Chem. Soc.*, 2011, **133**, 13774-13777.
- 7 K. Brak, J. A. Ellman, *J. Org. Chem.*, 2010, **75**, 3147-3150.
- 8 Y.-F. Zeng, W.-W. Ji, W.-X. Lv, Y. Chen, D.-H. Tan, Q. Li, H. Wang, *Angew. Chem., Int. Ed.*, 2017, **56**, 14707-14711.
- 9 B. E. Uno, E. P. Gillis, M. D. Burke, *Tetrahedron*, 2009, **65**, 3130-3138.
- 10 V. B. Corless, A. Holownia, H. Foy, R. Mendoza-Sanchez, S. Adachi, T. Dudding, A. K. Yudin, *Org. Lett.*, 2018, **20**, 5300-5303.
- 11 A. Modak, A. Deb, T. Patra, S. Rana, S. Maity, D. Maiti, *Chem. Commun.*, 2012, **48**, 4253-4255.
- 12 V. G. Landge, V. Yadav, M. Subaramanian, P. Dangarh, E. Balaraman, *Chem. Commun.*, 2019, **55**, 6130-6133.
- 13 S. Ceyhan, Y. Cetinkaya, A. Akdag, M. Balci, *Tetrahedron*, 2016, **72**, 6815-6824.
- 14 W.-X. Lv, Q. Li, J.-L. Li, Z. Li, E. Lin, D.-H. Tan, Y.-H. Cai, W.-X. Fan, H. Wang, *Angew. Chem., Int. Ed.*, 2018, **57**, 16544-16548.

## 7. NMR spectra of the products

(*E*)-4-methyl-8-styryldihydro-4 $\lambda^4$ ,8 $\lambda^4$ -[1,3,2]oxazaborolo[2,3-*b*][1,3,2]oxazaborole-2,6(3*H*,5*H*)-dione (**3**)

$^1\text{H}$  NMR (400 MHz,  $\text{CD}_3\text{CN}$ )

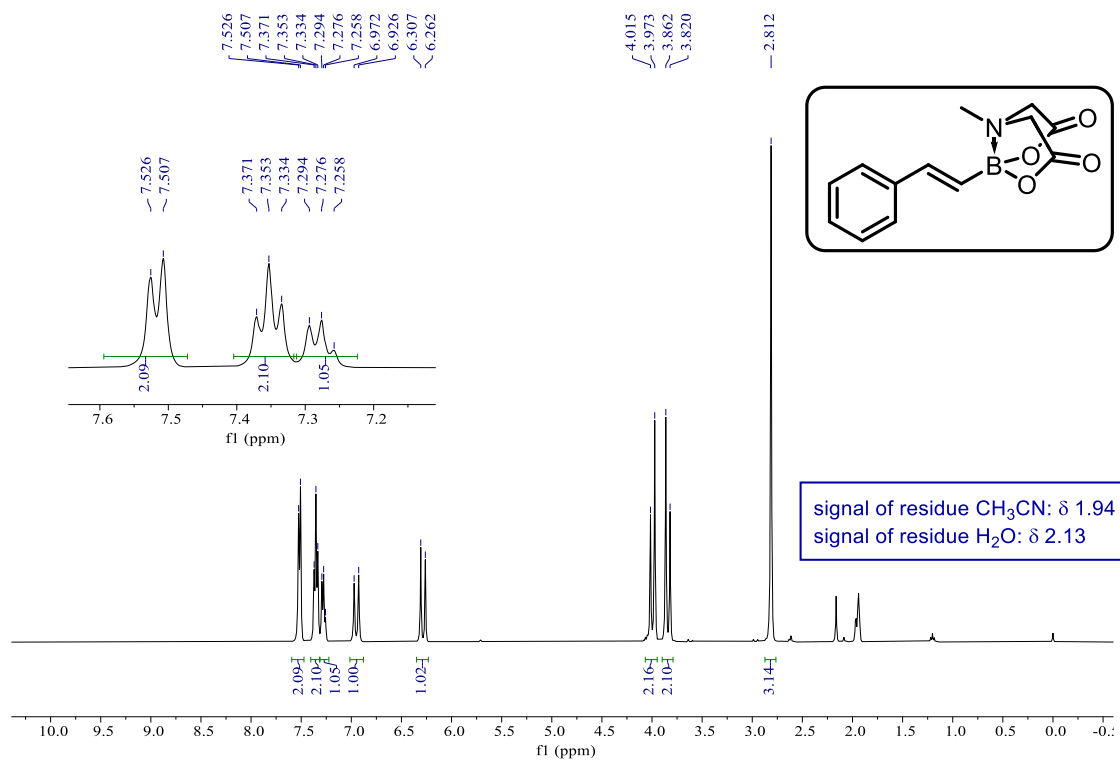

$^{13}\text{C}\{^1\text{H}\}$  NMR (100 MHz,  $\text{CD}_3\text{CN}$ )

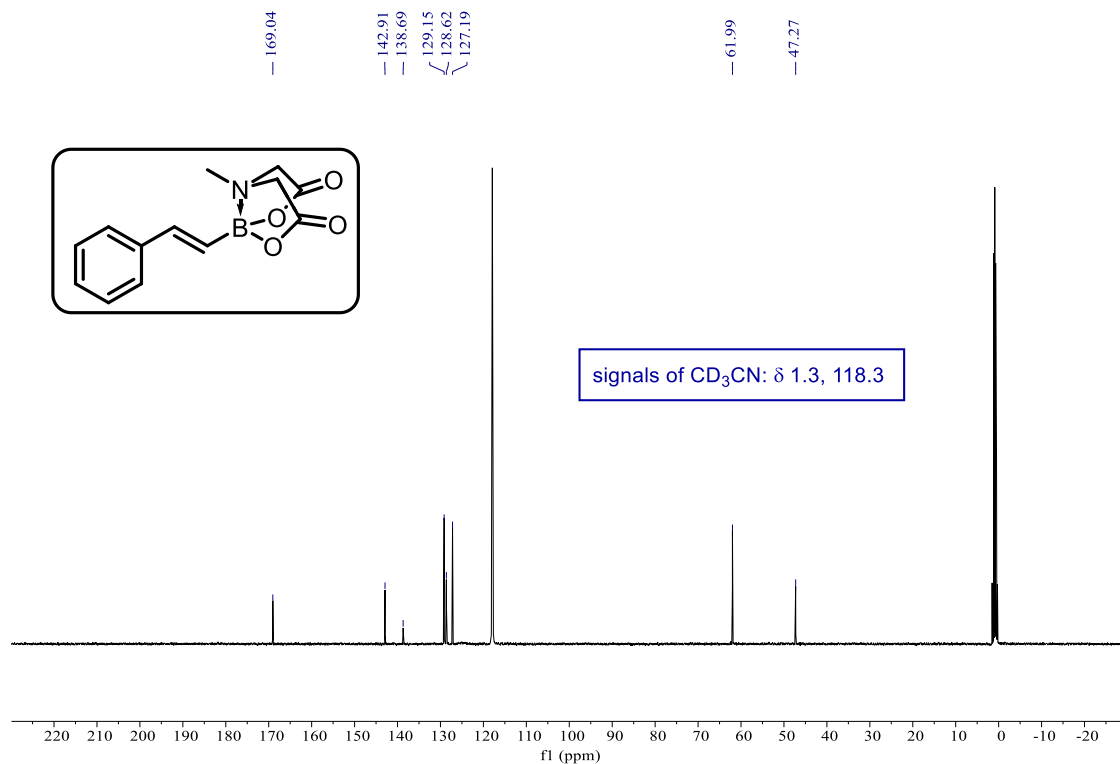

(*E*)-4-methyl-8-(4-methylstyryl)dihydro-4 $\lambda^4$ ,8 $\lambda^4$ -[1,3,2]oxazaborolo[2,3-*b*][1,3,2]oxazaborole-2,6(3*H*,5*H*)-dione (**4**)

$^1\text{H}$  NMR (400 MHz,  $\text{CD}_3\text{CN}$ )

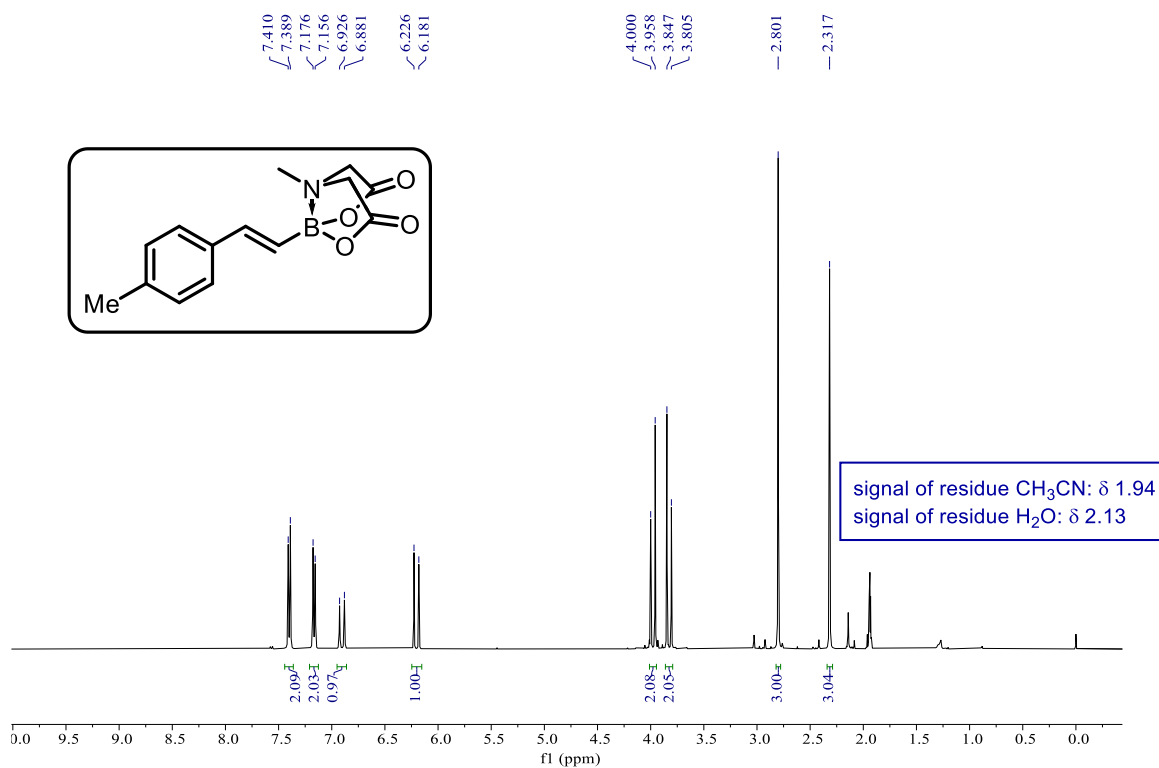

$^{13}\text{C}\{^1\text{H}\}$  NMR (100 MHz,  $\text{CD}_3\text{CN}$ )

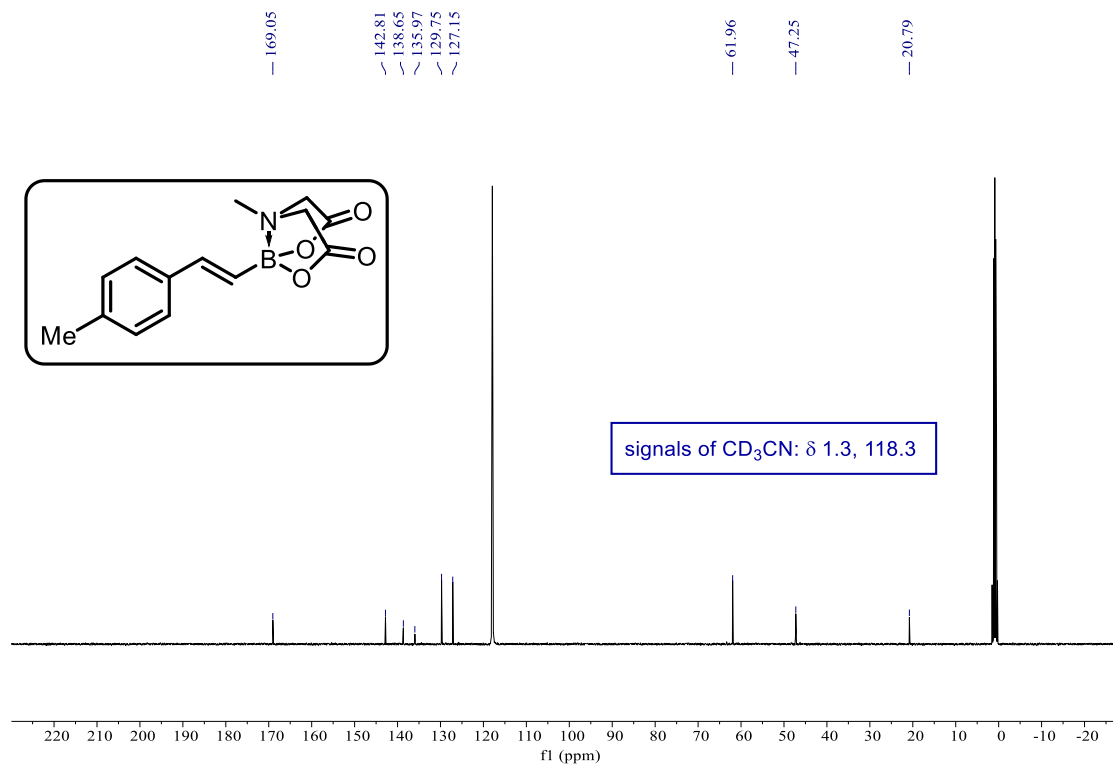



(*E*)-8-(4-(*tert*-butyl)styryl)-4-methyldihydro-4 $\lambda^4$ ,8 $\lambda^4$ -[1,3,2]oxazaborolo[2,3-*b*][1,3,2]oxazaborole-2,6(3*H*,5*H*)-dione (**5**)

$^1\text{H}$  NMR (400 MHz,  $\text{CD}_3\text{CN}$ )

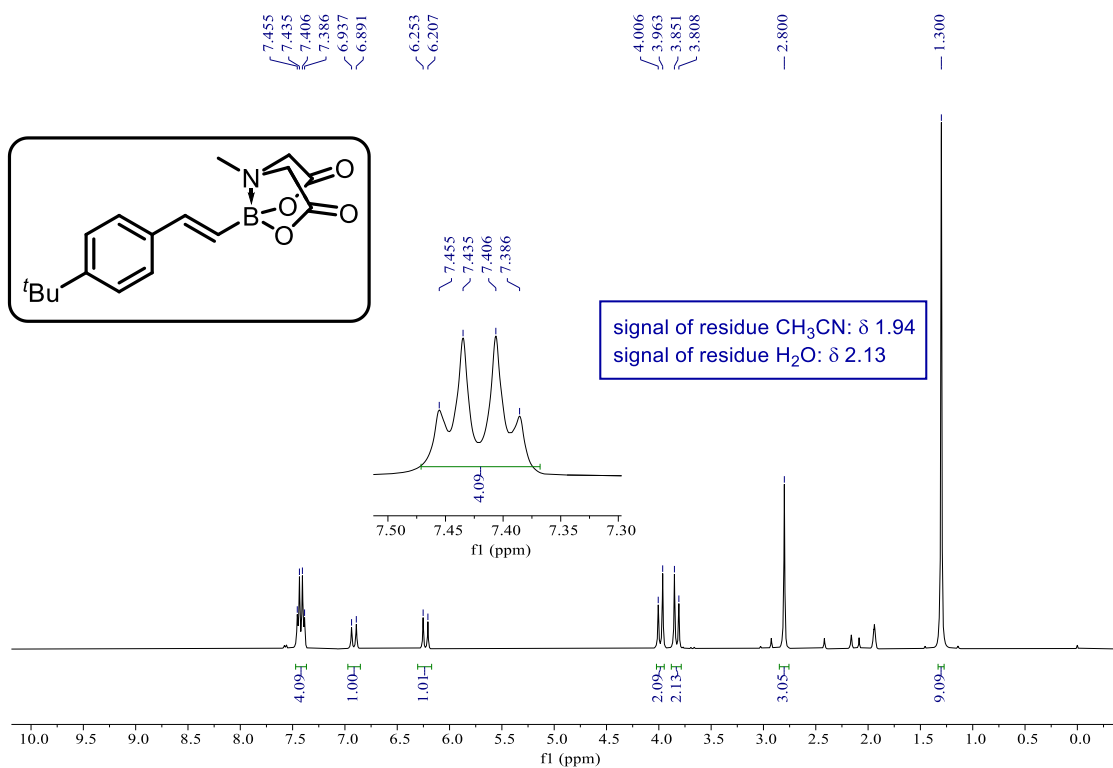

$^{13}\text{C}\{^1\text{H}\}$  NMR (100 MHz,  $\text{CD}_3\text{CN}$ )

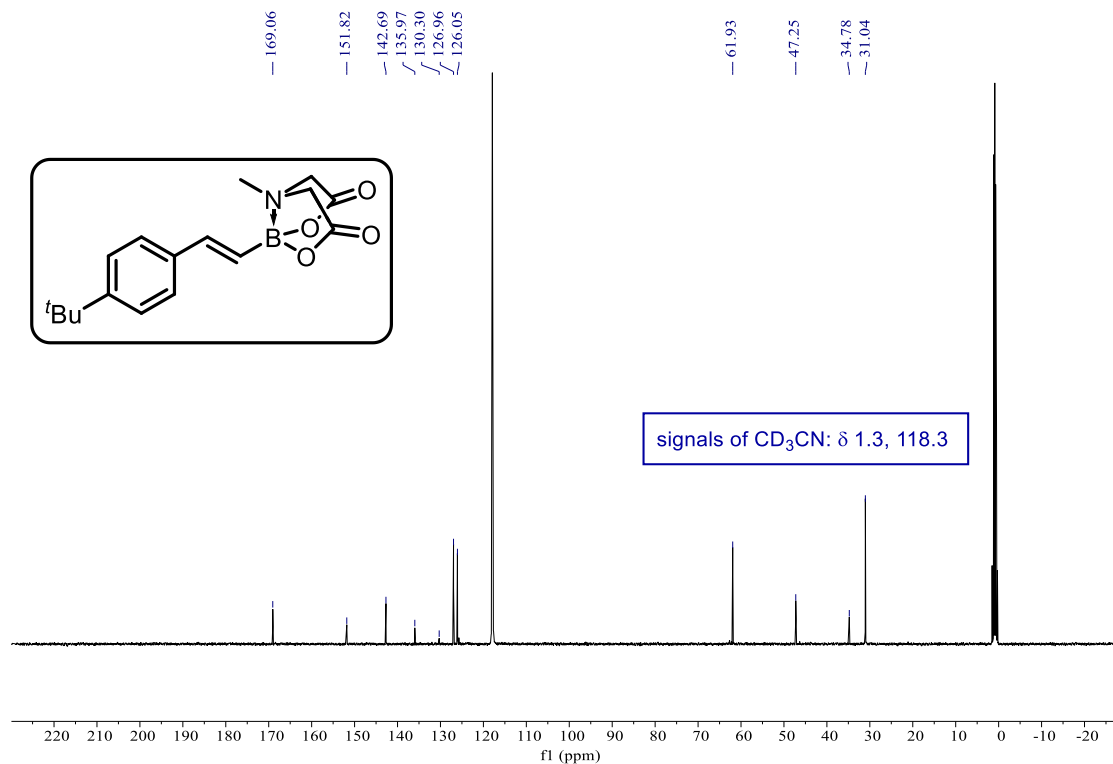

(*E*)-8-(2-([1,1'-biphenyl]-4-yl)vinyl)-4-methyldihydro- $\lambda^4,8\lambda^4$ -[1,3,2]oxazaborolo[2,3-*b*][1,3,2]oxazaborole-2,6(3*H*,5*H*)-dione (**6**)

$^1\text{H}$  NMR (400 MHz,  $\text{CD}_3\text{CN}$ )

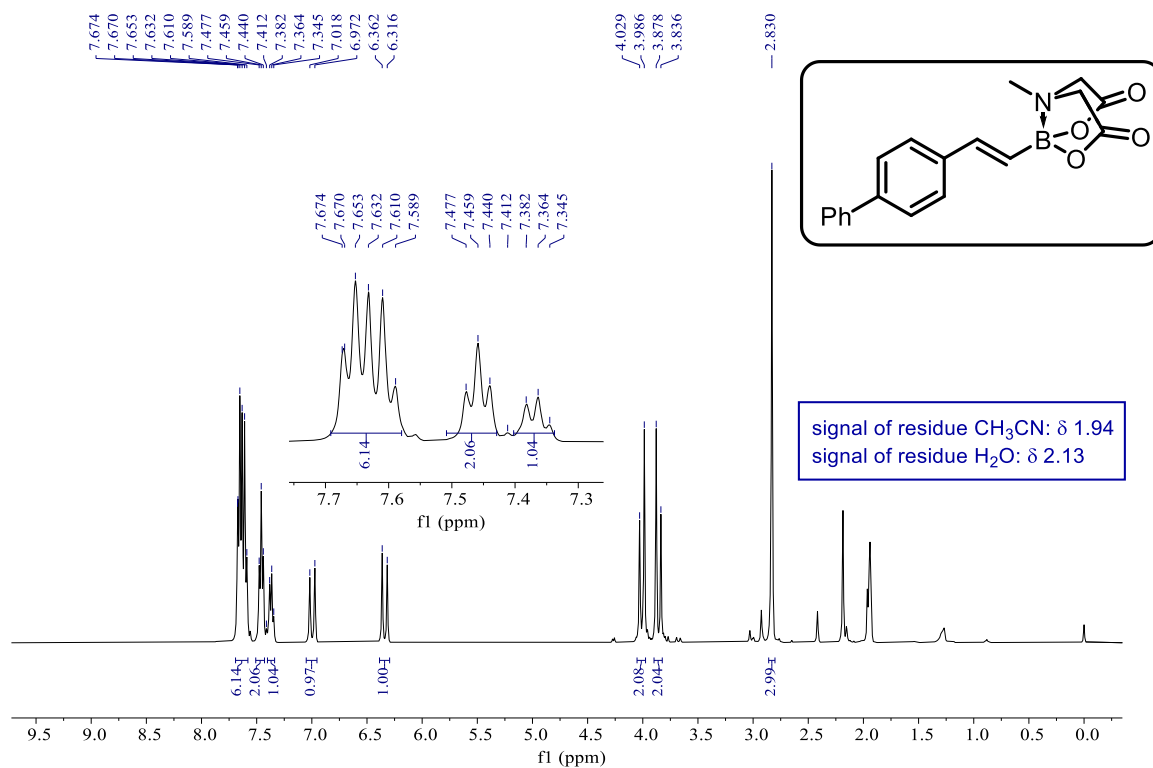

$^{13}\text{C}\{^1\text{H}\}$  NMR (100 MHz,  $\text{CD}_3\text{CN}$ )

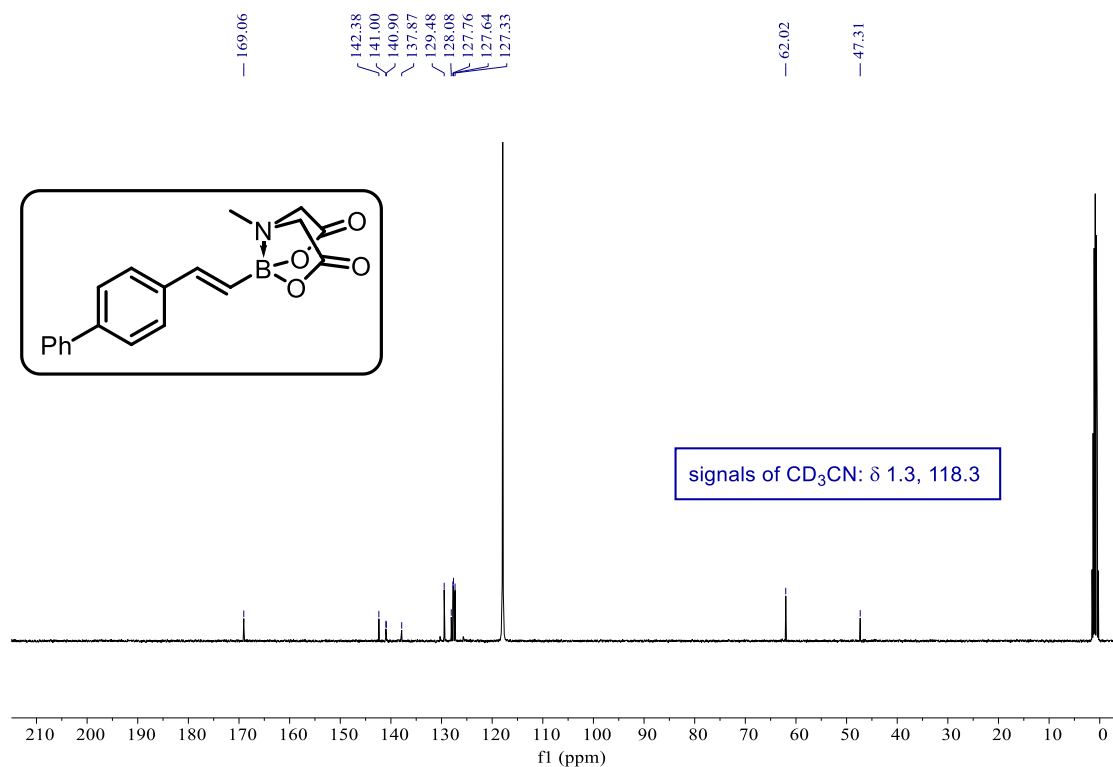

(E)-4-methyl-8-(4-(trifluoromethoxy)styryl)dihydro- $\lambda^4,8\lambda^4$ -[1,3,2]oxazaborolo[2,3-*b*][1,3,2]oxazaborole-2,6(3*H*,5*H*)-dione (**7**)

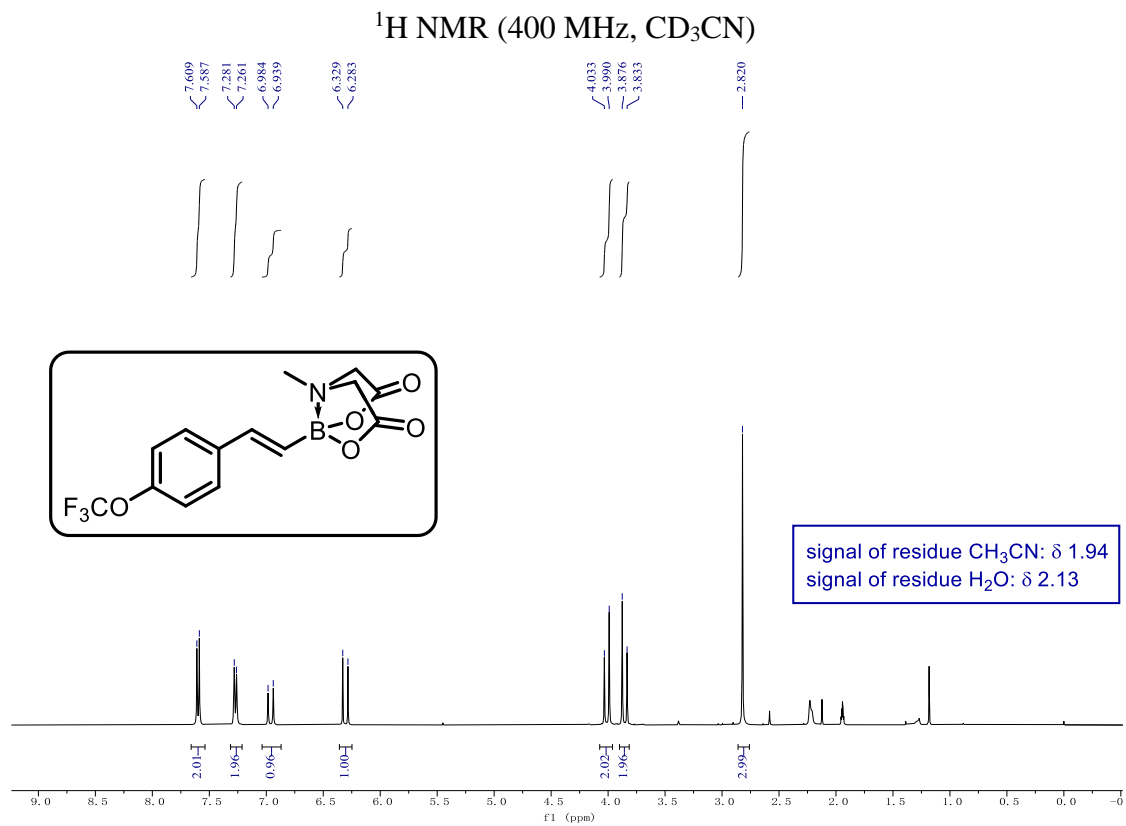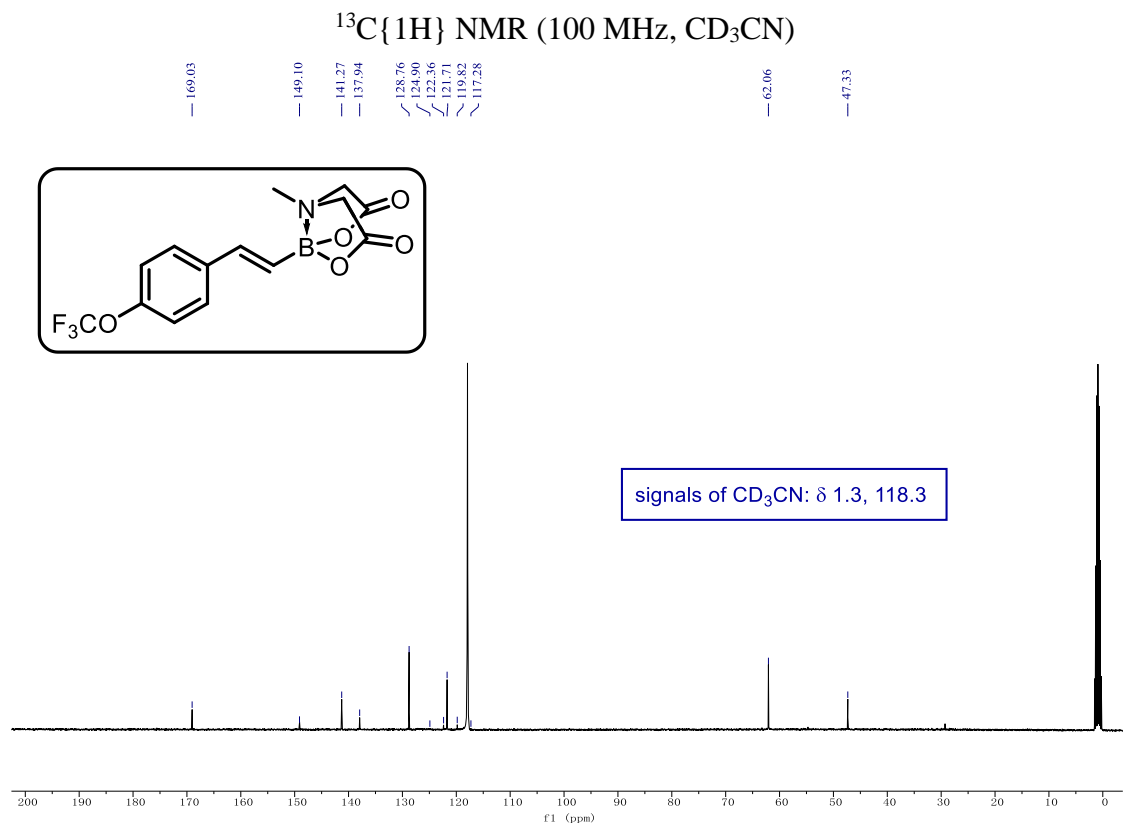

$^{19}\text{F}$  NMR (471 MHz,  $\text{CD}_3\text{CN}$ )

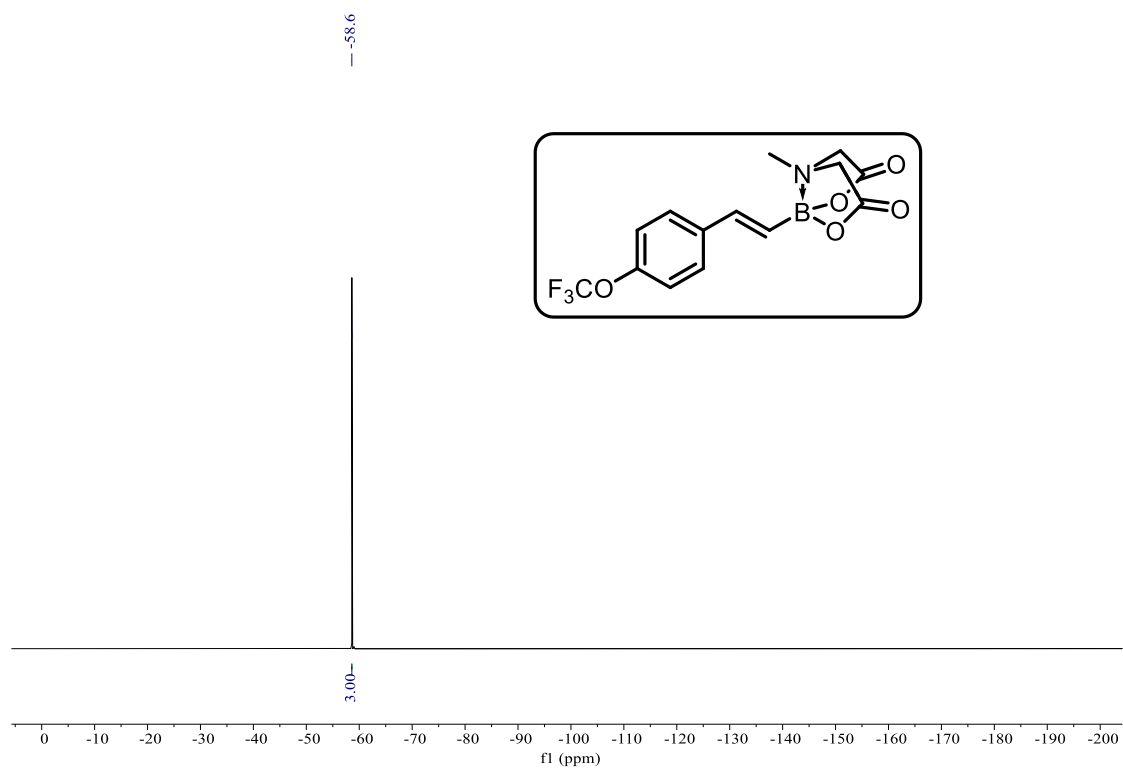

(*E*)-8-(4-methoxystyryl)-4-methyldihydro- $\lambda^4,8\lambda^4$ -[1,3,2]oxazaborolo[2,3-*b*][1,3,2]oxazaborole-2,6(3*H*,5*H*)-dione (**8**)

$^1\text{H}$  NMR (400 MHz,  $\text{CD}_3\text{CN}$ )

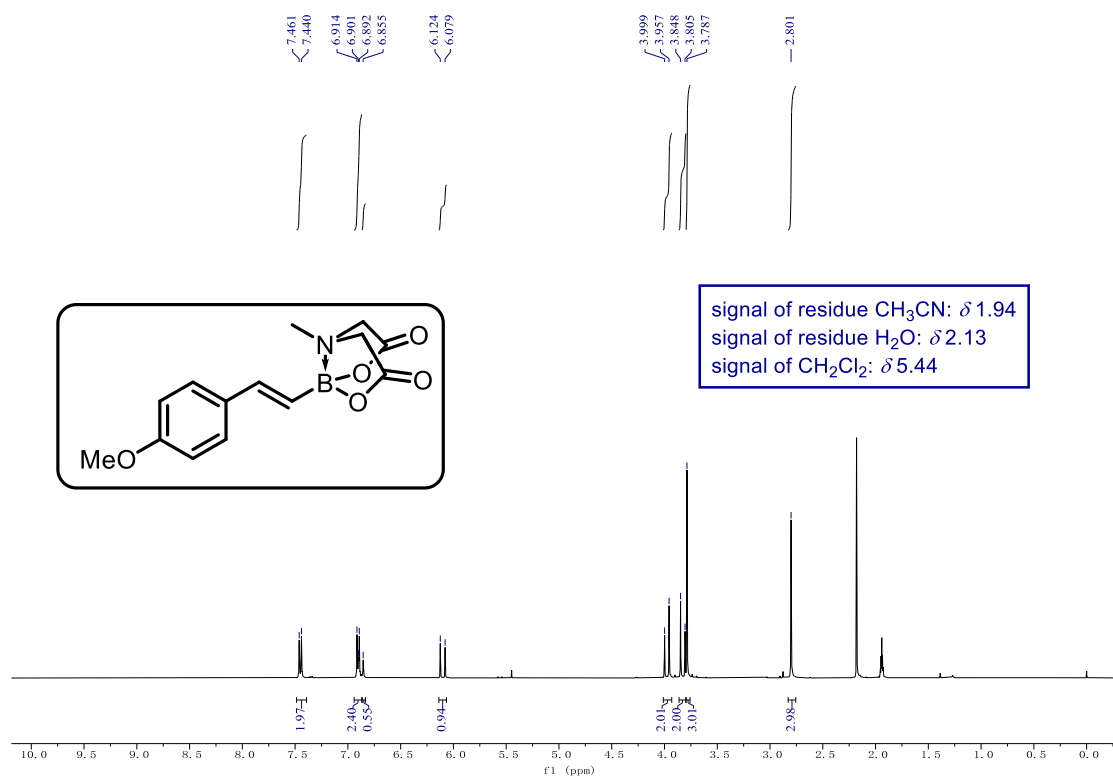

$^{13}\text{C}\{^1\text{H}\}$  NMR (100 MHz,  $\text{CD}_3\text{CN}$ )

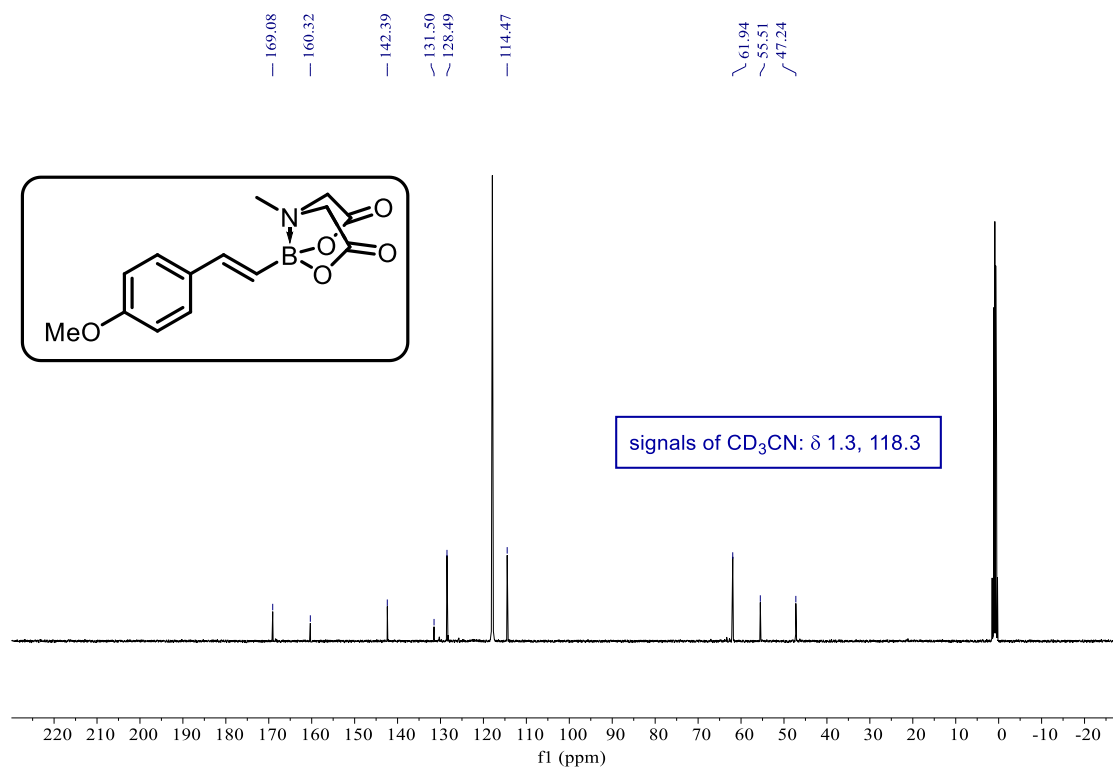

(*E*)-8-(4-fluorostyryl)-4-methyldihydro- $\lambda^4,8\lambda^4$ -[1,3,2]oxazaborolo[2,3-*b*][1,3,2]oxazaborole-2,6(3*H*,5*H*)-dione (**9**)

$^1\text{H}$  NMR (400 MHz,  $\text{CD}_3\text{CN}$ )

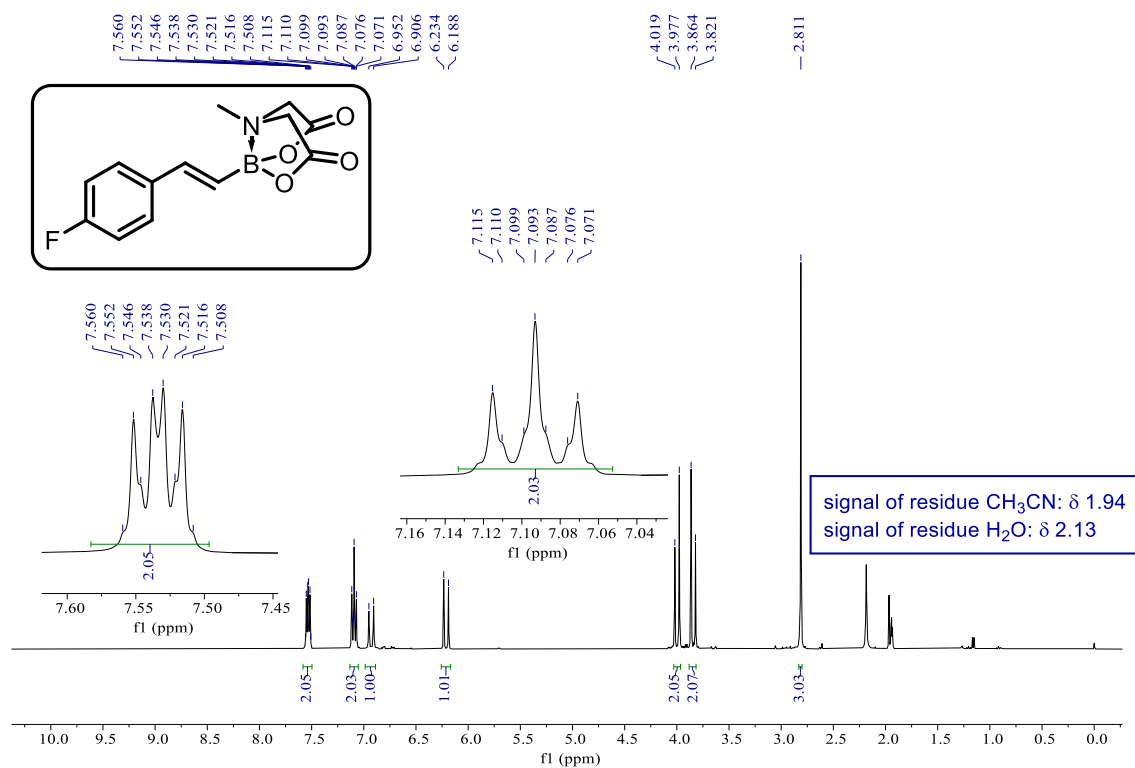

$^{13}\text{C}\{^1\text{H}\}$  NMR (100 MHz,  $\text{CD}_3\text{CN}$ )

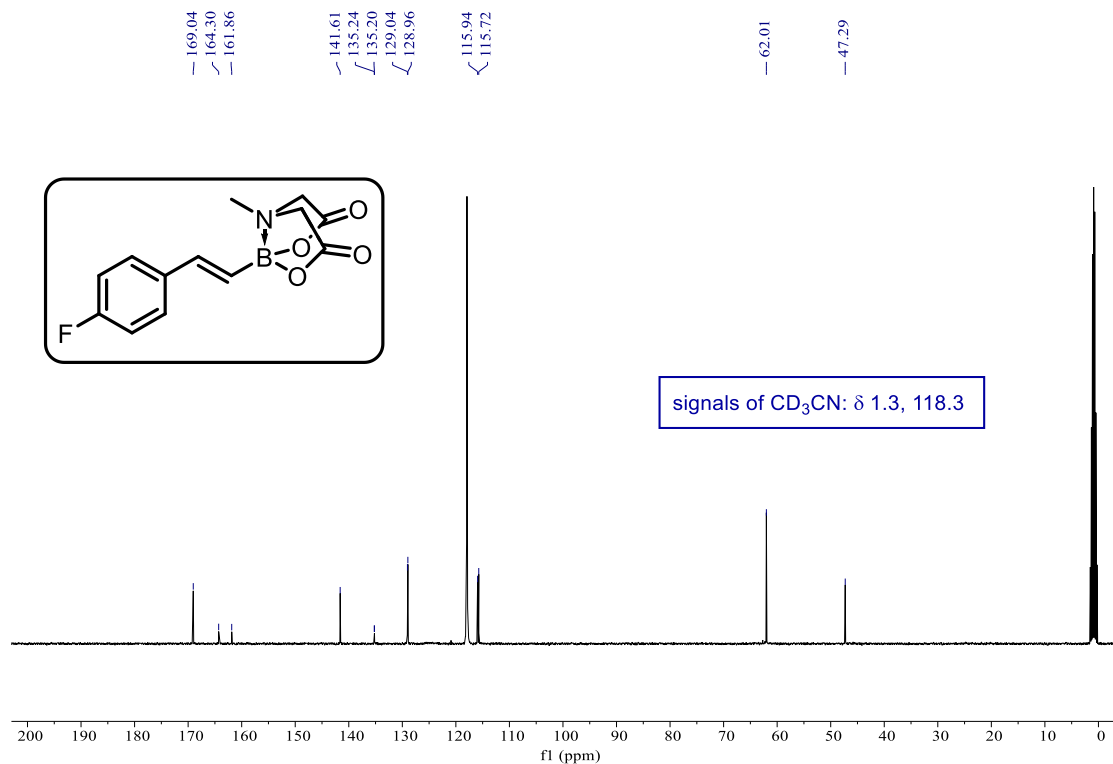

$^{19}\text{F}$  NMR (471 MHz,  $\text{CD}_3\text{CN}$ )

-115.7  
-115.8  
-115.8  
-115.8  
-115.8  
-115.8

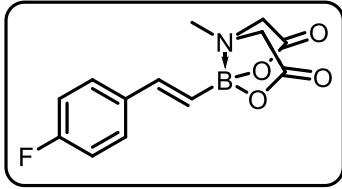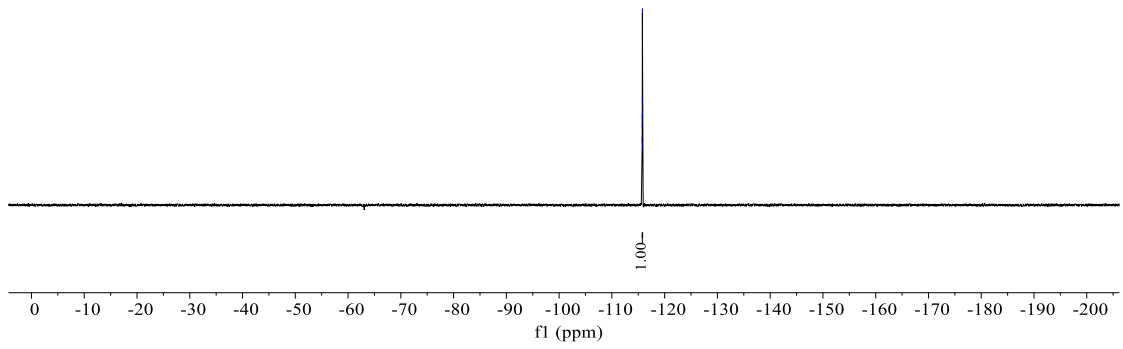

(*E*)-8-(4-chlorostyryl)-4-methyldihydro- $\lambda^4,8\lambda^4$ -[1,3,2]oxazaborolo[2,3-*b*][1,3,2]oxazaborole-2,6(3*H*,5*H*)-dione (**10**)

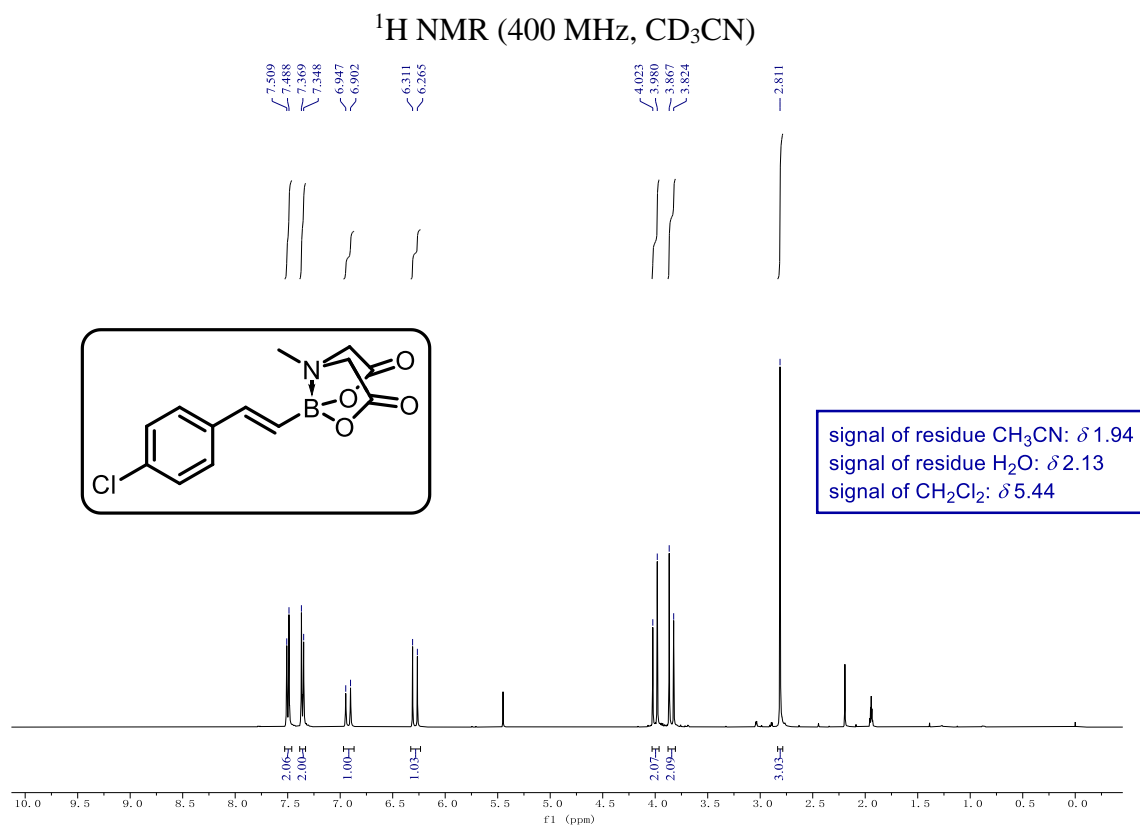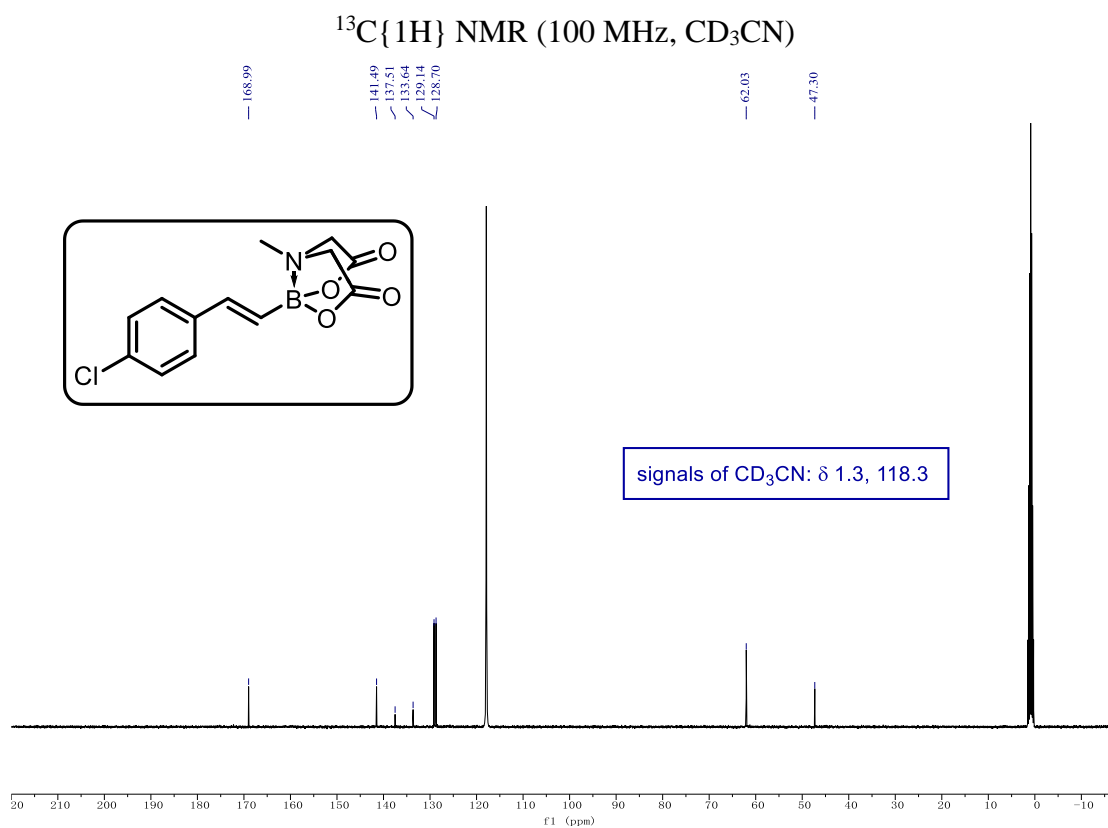



(*E*)-8-(4-bromostyryl)-4-methyldihydro- $\lambda^4,8\lambda^4$ -[1,3,2]oxazaborolo[2,3-*b*][1,3,2]oxazaborole-2,6(3*H*,5*H*)-dione (**11**)

$^1\text{H}$  NMR (400 MHz,  $\text{CD}_3\text{CN}$ )

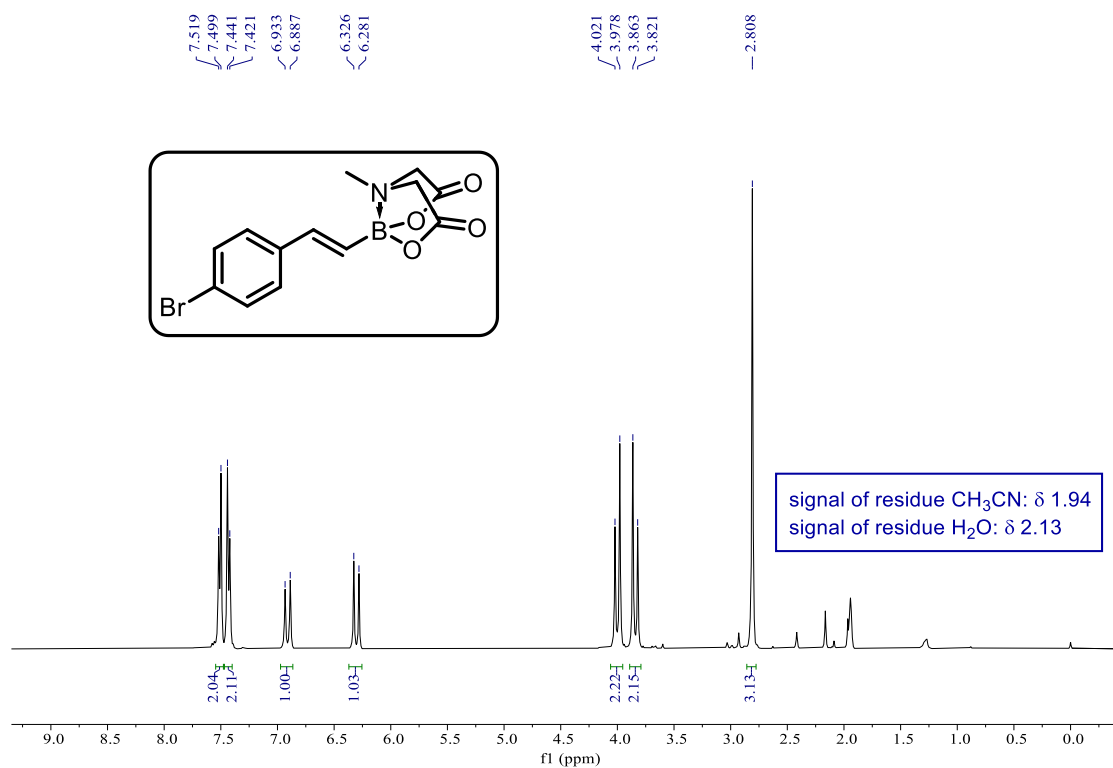

$^{13}\text{C}\{^1\text{H}\}$  NMR (100 MHz,  $\text{CD}_3\text{CN}$ )

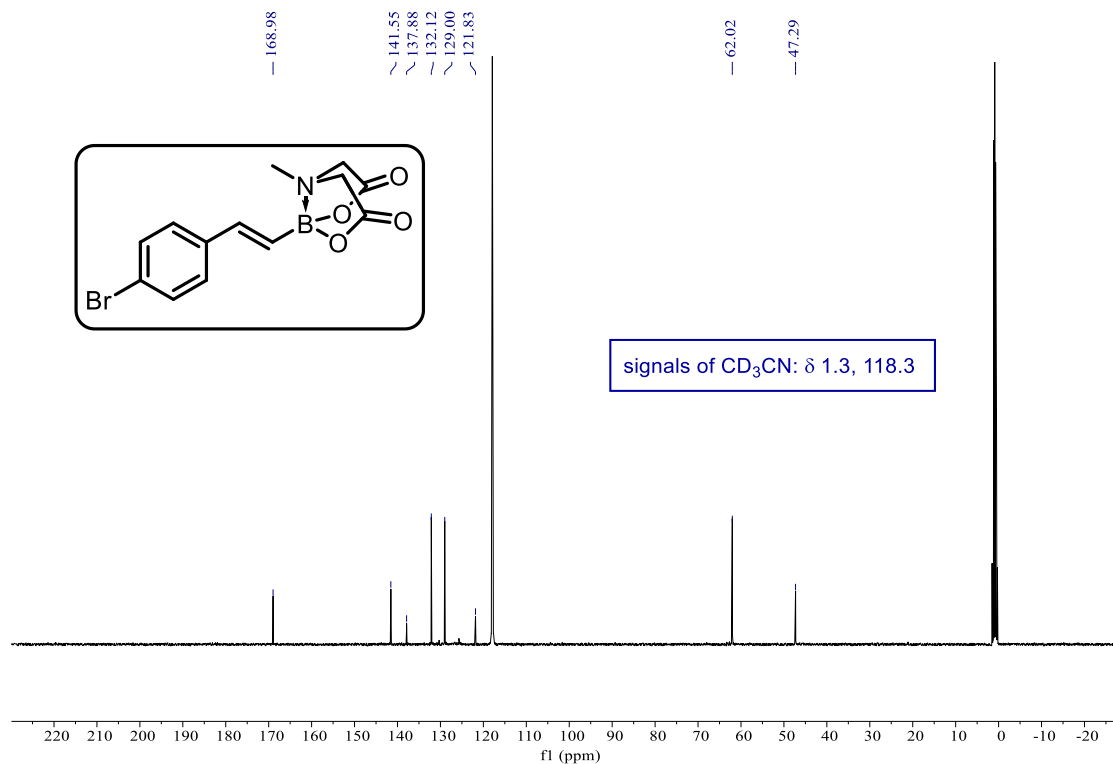

(*E*)-4-methyl-8-(4-(trifluoromethyl)styryl)dihydro- $\lambda^4,8\lambda^4$ -[1,3,2]oxazaborolo[2,3-*b*][1,3,2]oxazaborole-2,6(3*H*,5*H*)-dione (**12**)

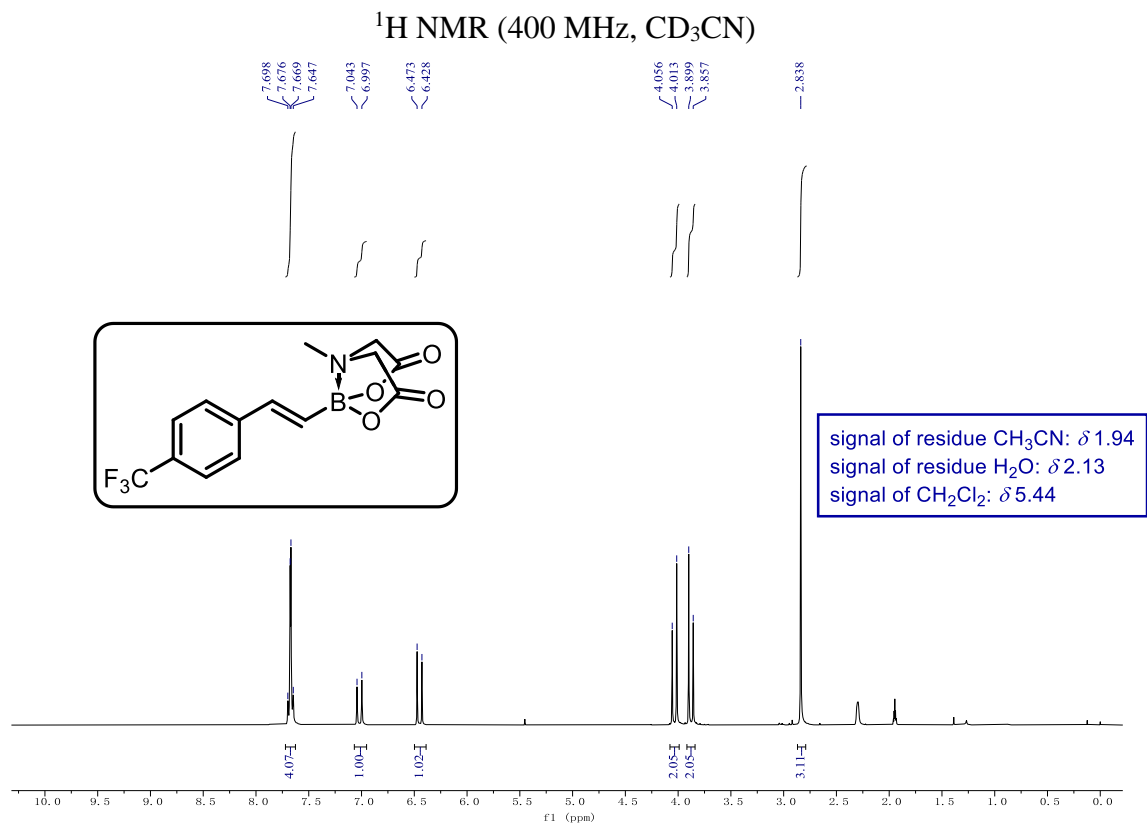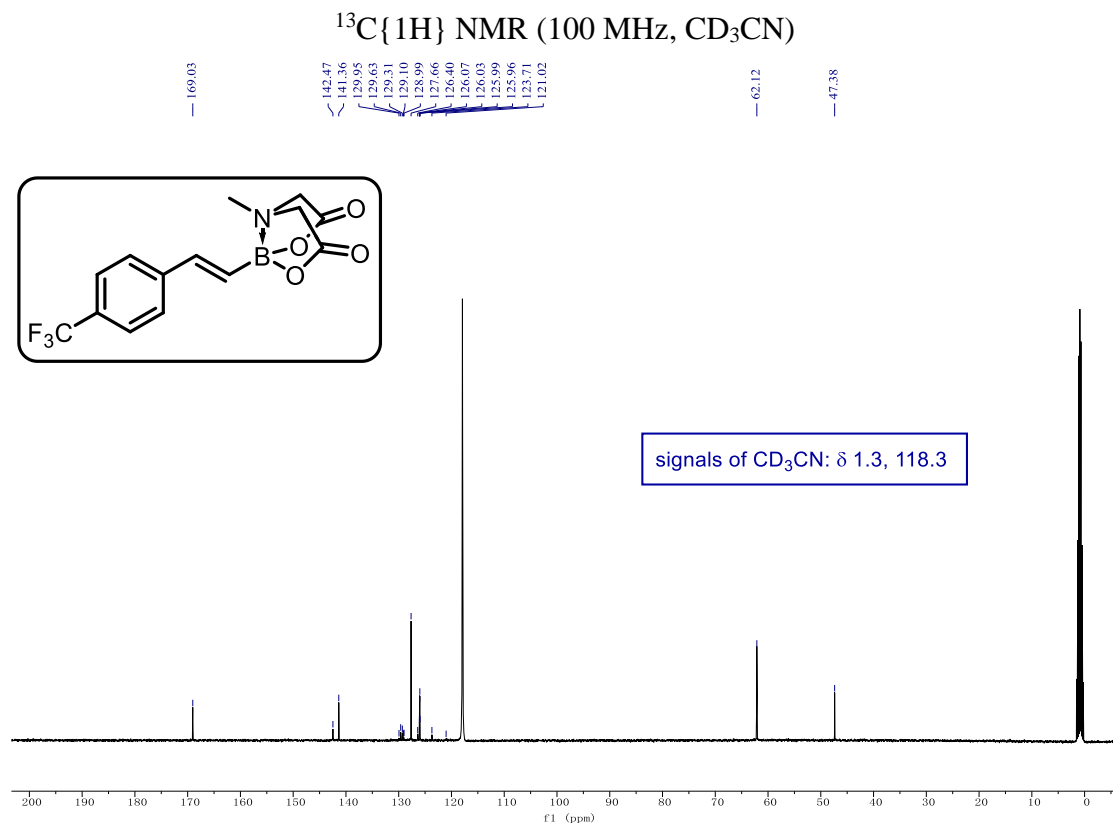

$^{19}\text{F}$  NMR (471 MHz,  $\text{CD}_3\text{CN}$ )

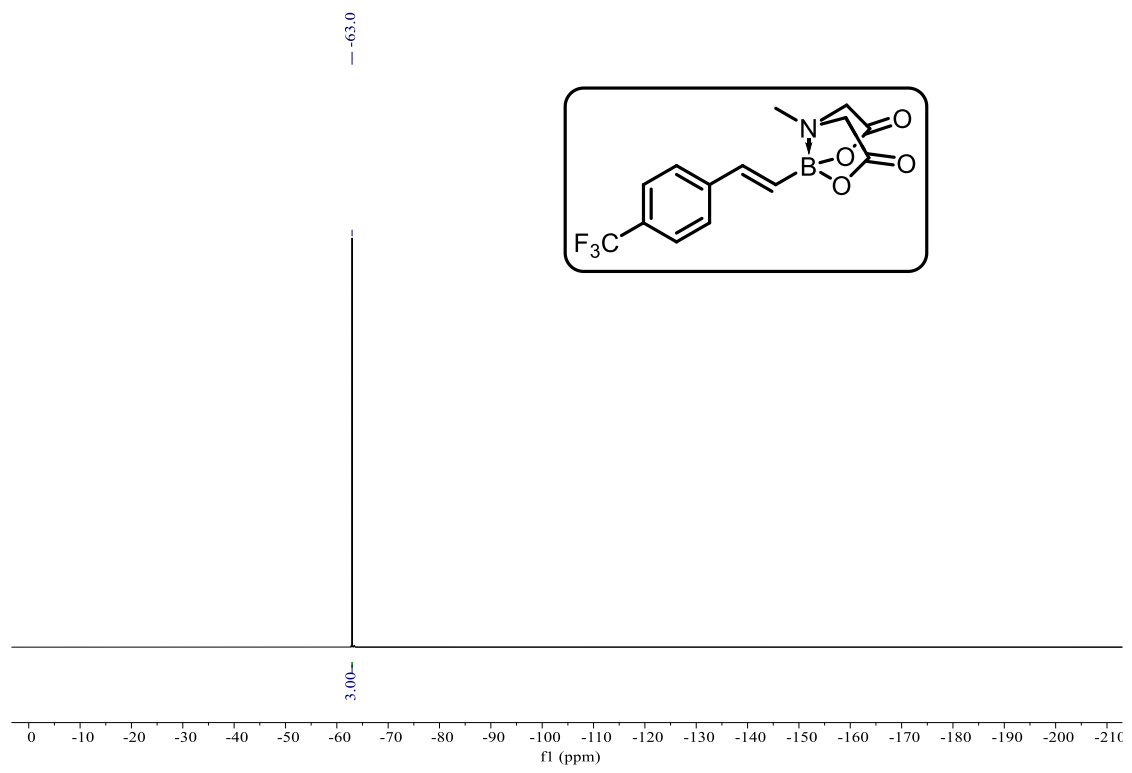

(*E*)-4-methyl-8-(4-nitrostyryl)dihydro- $\lambda^4,8\lambda^4$ -[1,3,2]oxazaborolo[2,3-*b*][1,3,2]oxazaborole-2,6(3*H*,5*H*)-dione (**13**)

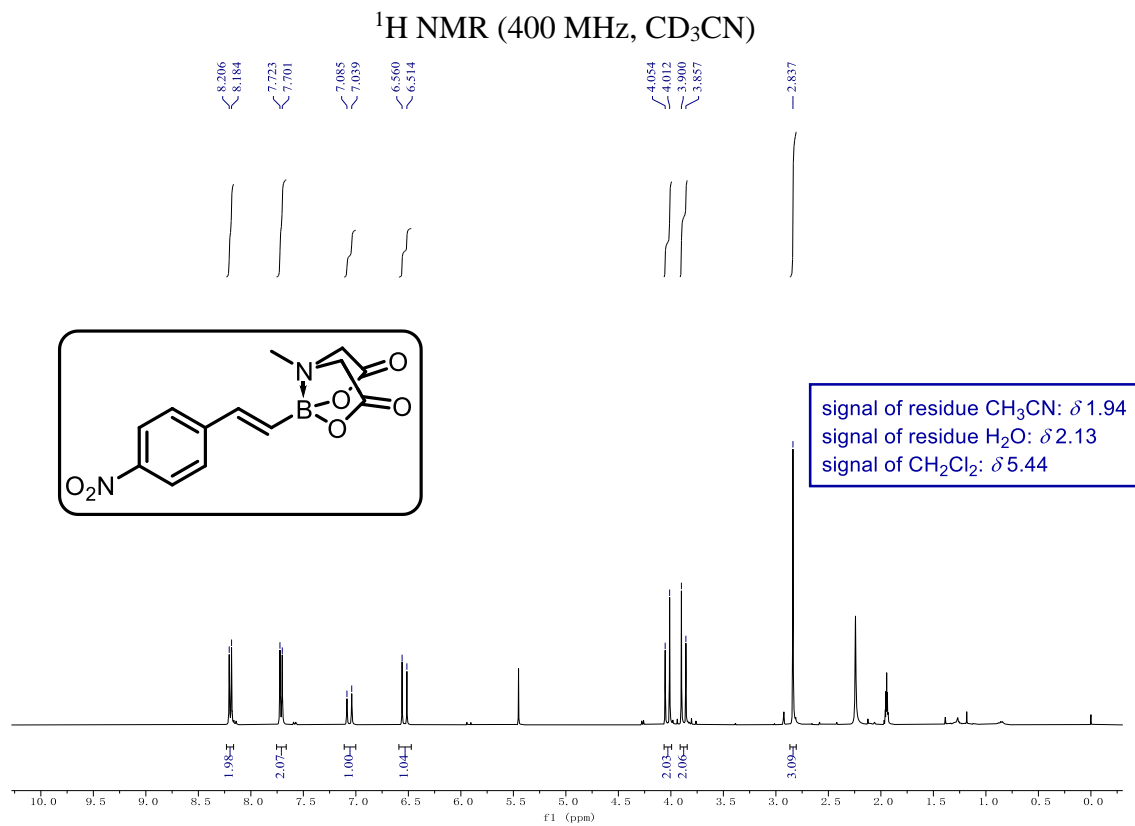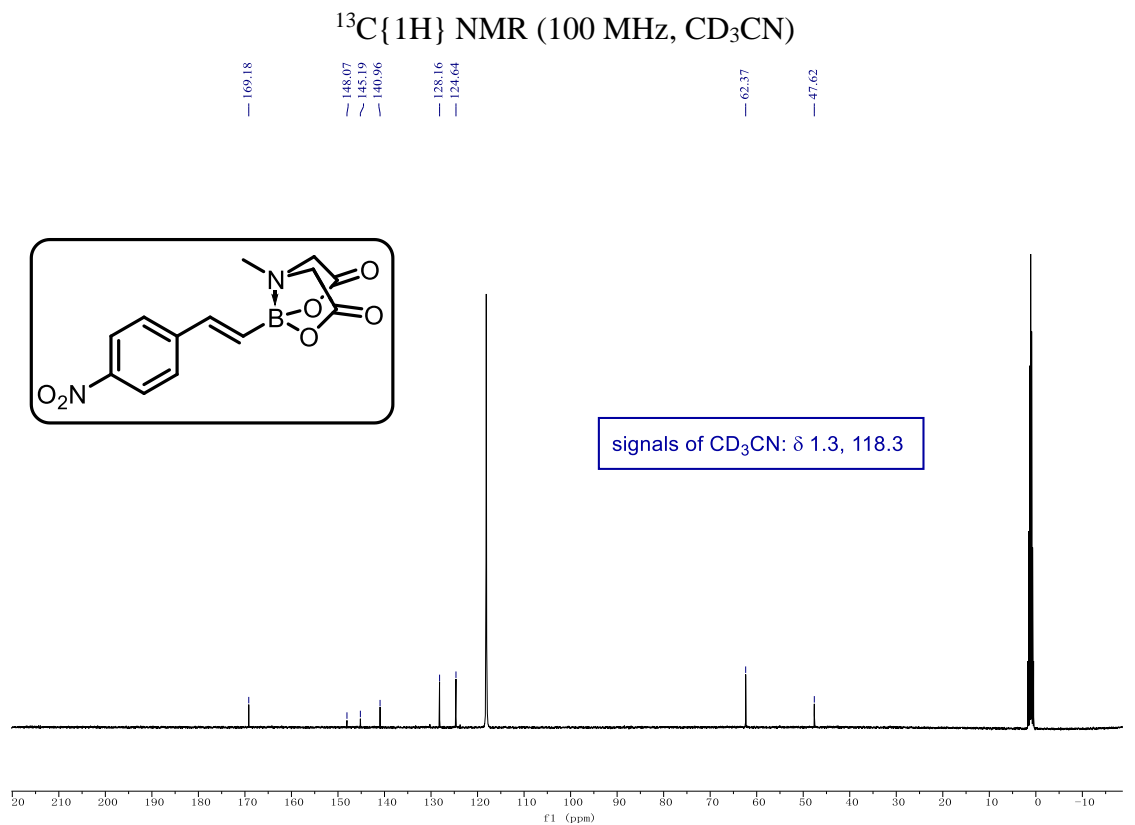

(*E*)-4-(2-(4-methyl-2,6-dioxotetrahydro-2*H*- $\lambda^4,8\lambda^4$ -[1,3,2]oxazaborolo[2,3-*b*][1,3,2]oxazaborol-8-yl)vinyl)benzotrile (**14**)

$^1\text{H}$  NMR (400 MHz,  $\text{CD}_3\text{CN}$ )

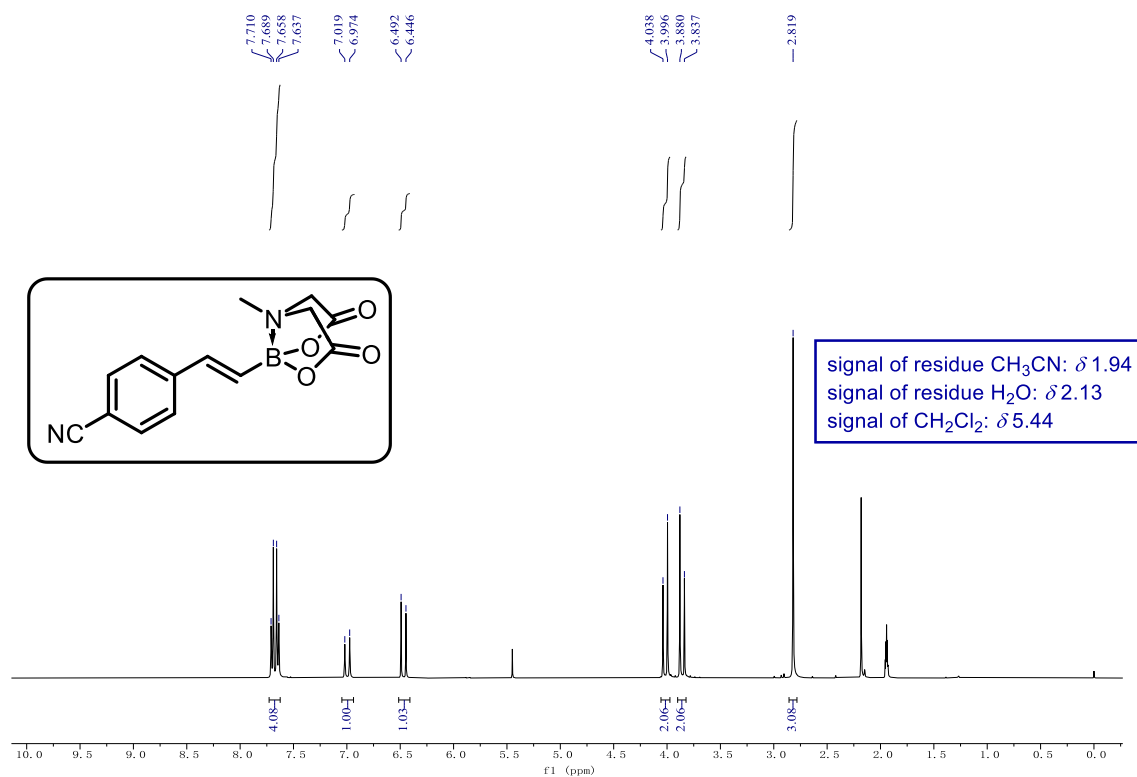

$^{13}\text{C}\{^1\text{H}\}$  NMR (100 MHz,  $\text{CD}_3\text{CN}$ )

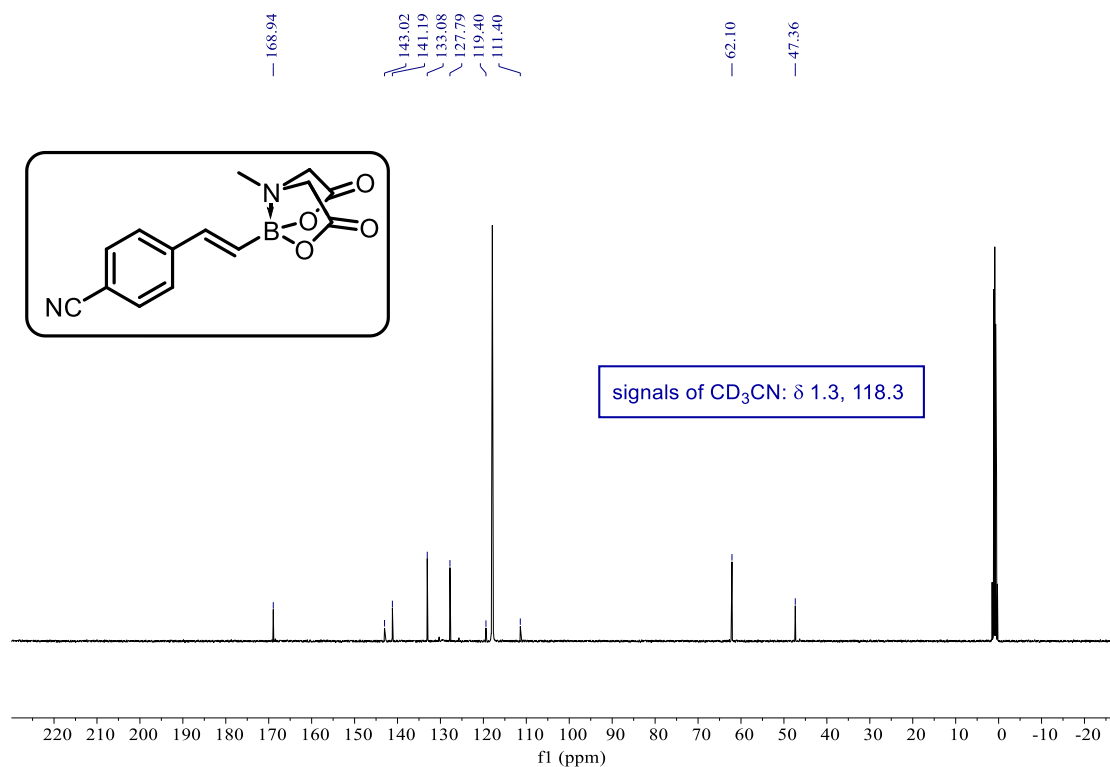

methyl (*E*)-4-(2-(4-methyl-2,6-dioxotetrahydro-2*H*- $\lambda^4,8\lambda^4$ -[1,3,2]oxazaborolo[2,3-*b*][1,3,2]oxazaborol-8-yl)vinyl)benzoate (**15**)

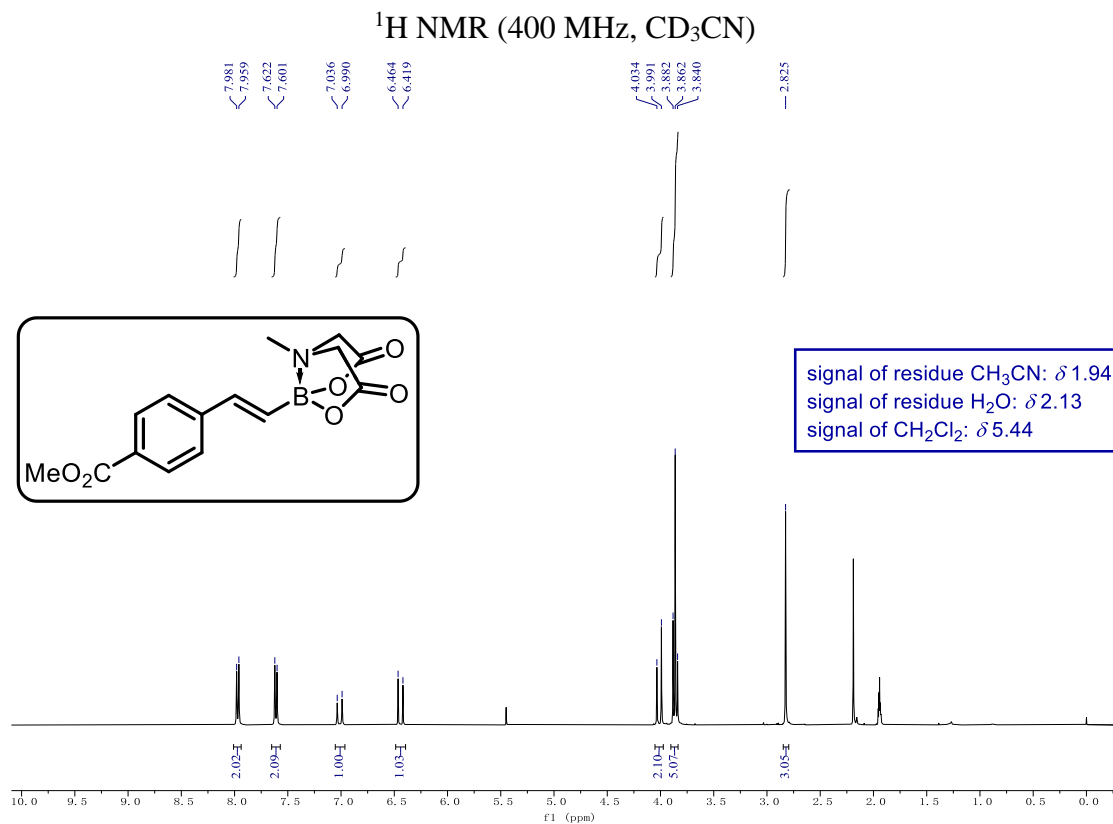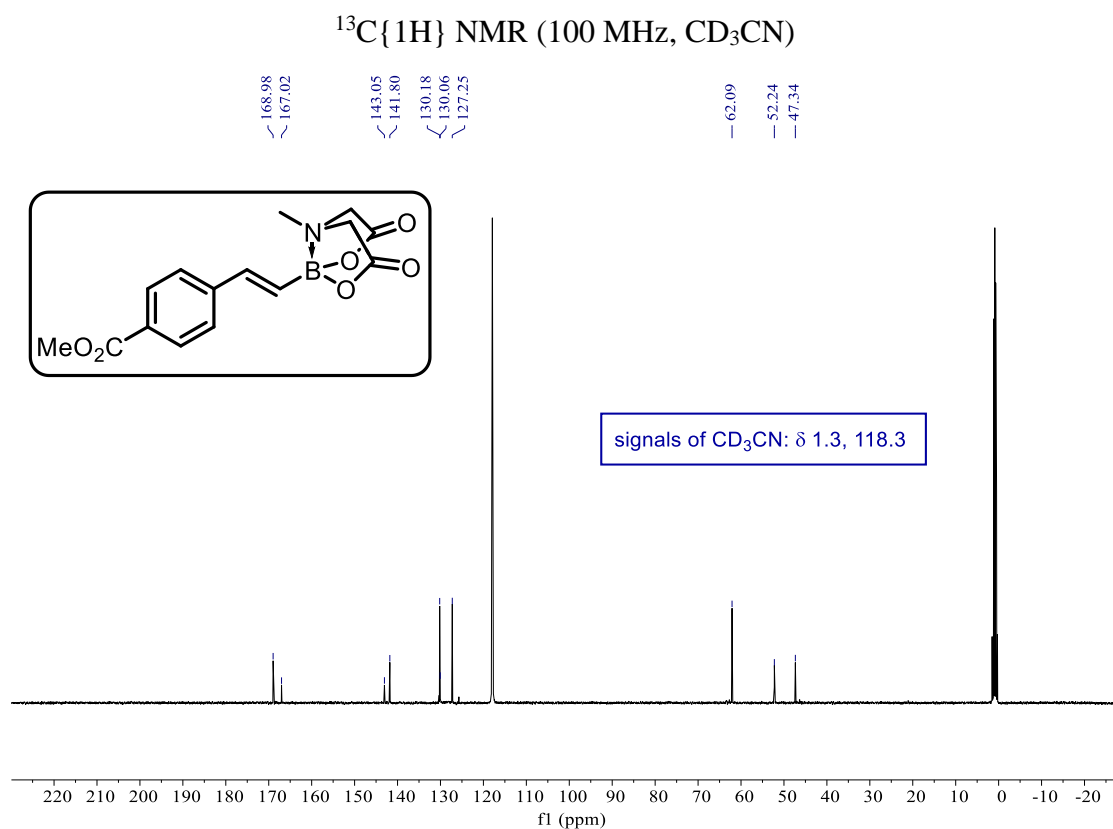

(*E*)-8-(2-fluorostyryl)-4-methyldihydro- $\lambda^4,8\lambda^4$ -[1,3,2]oxazaborolo[2,3-*b*][1,3,2]oxazaborole-2,6(3*H*,5*H*)-dione (**16**)

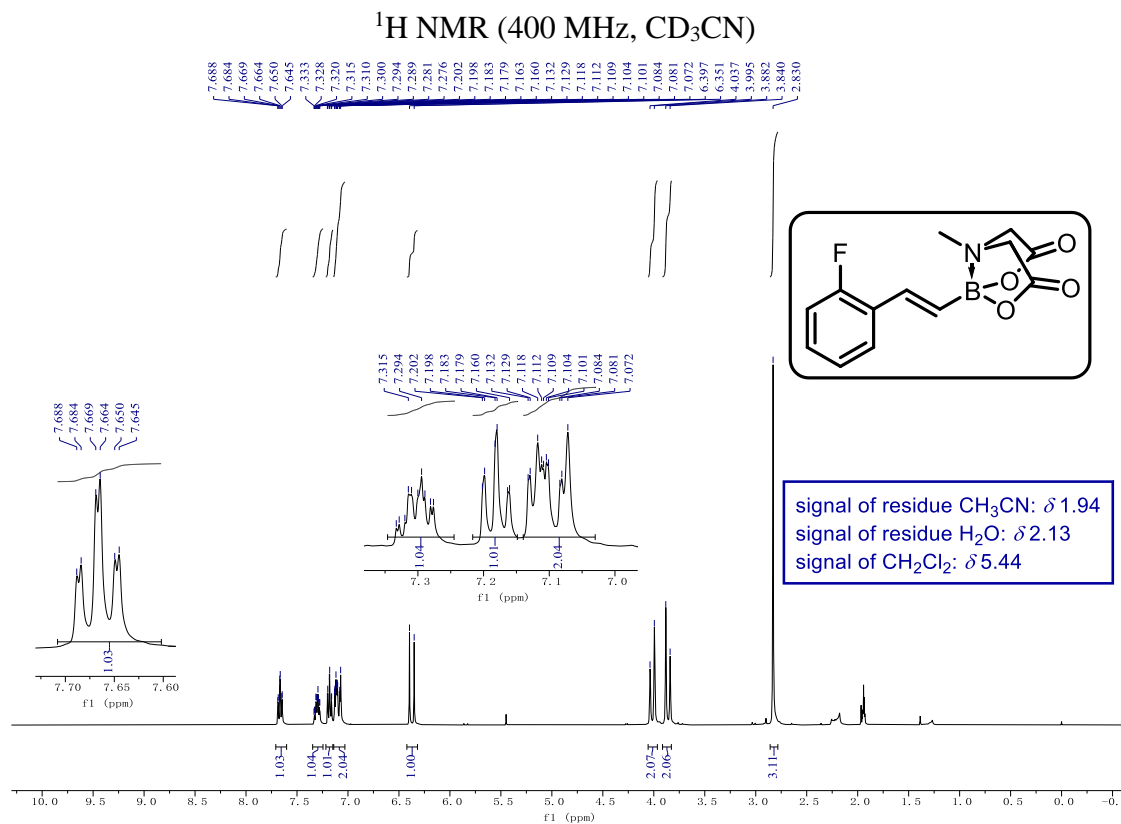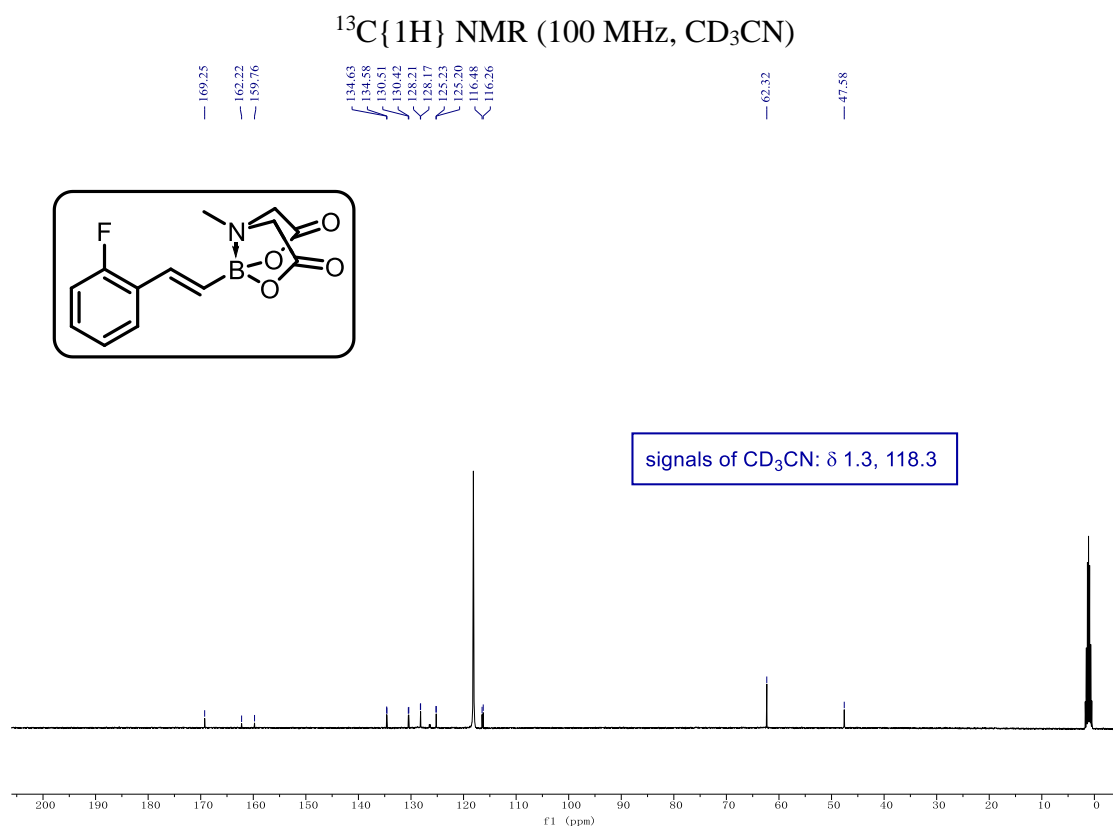

$^{19}\text{F}$  NMR (471 MHz,  $\text{CD}_3\text{CN}$ )

-120.8  
-120.8  
-120.8  
-120.8

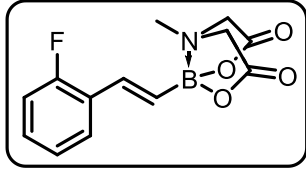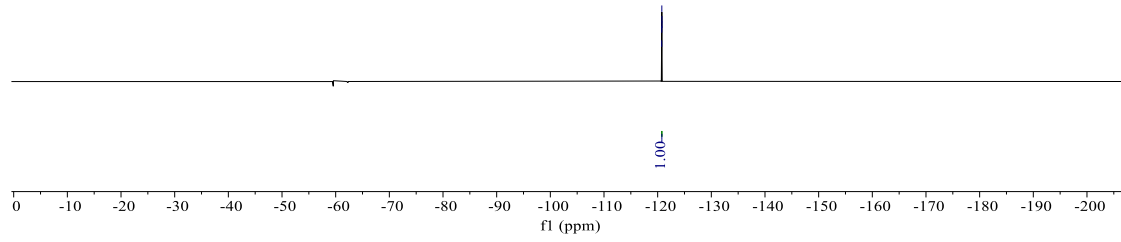



(*E*)-8-(2-chlorostyryl)-4-methyldihydro- $\lambda^4,8\lambda^4$ -[1,3,2]oxazaborolo[2,3-*b*][1,3,2]oxazaborole-2,6(3*H*,5*H*)-dione (**17**)

$^1\text{H}$  NMR (400 MHz,  $\text{CD}_3\text{CN}$ )

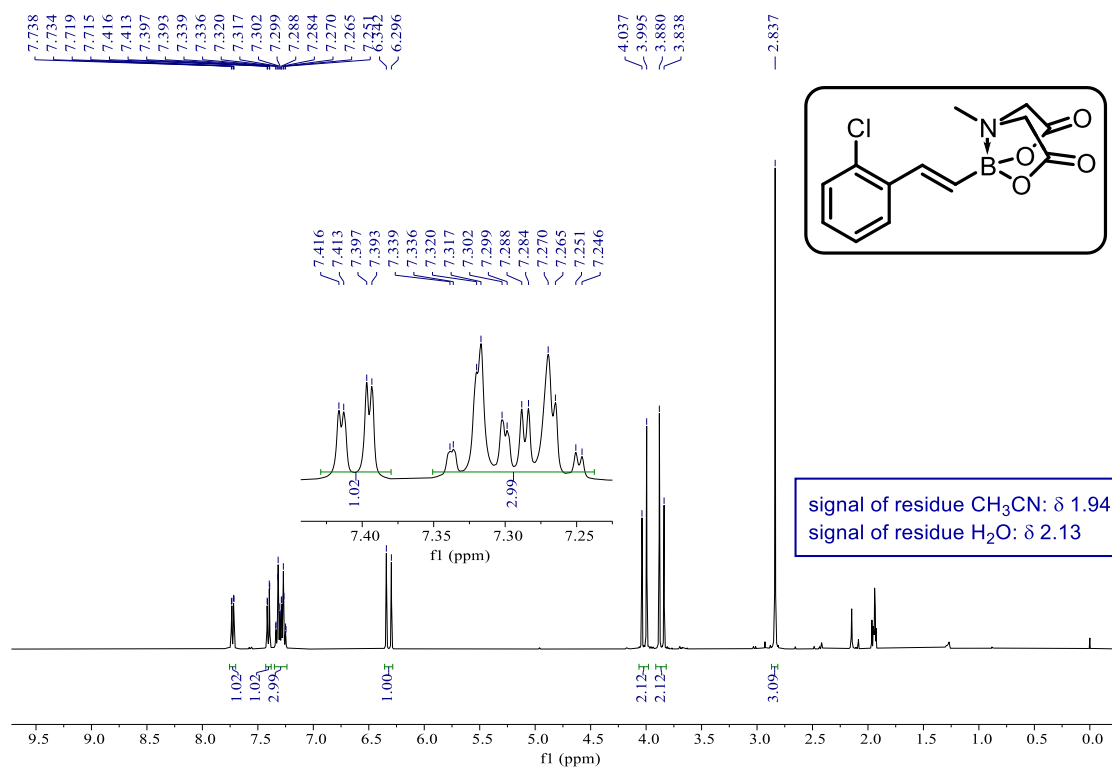

$^{13}\text{C}\{^1\text{H}\}$  NMR (100 MHz,  $\text{CD}_3\text{CN}$ )

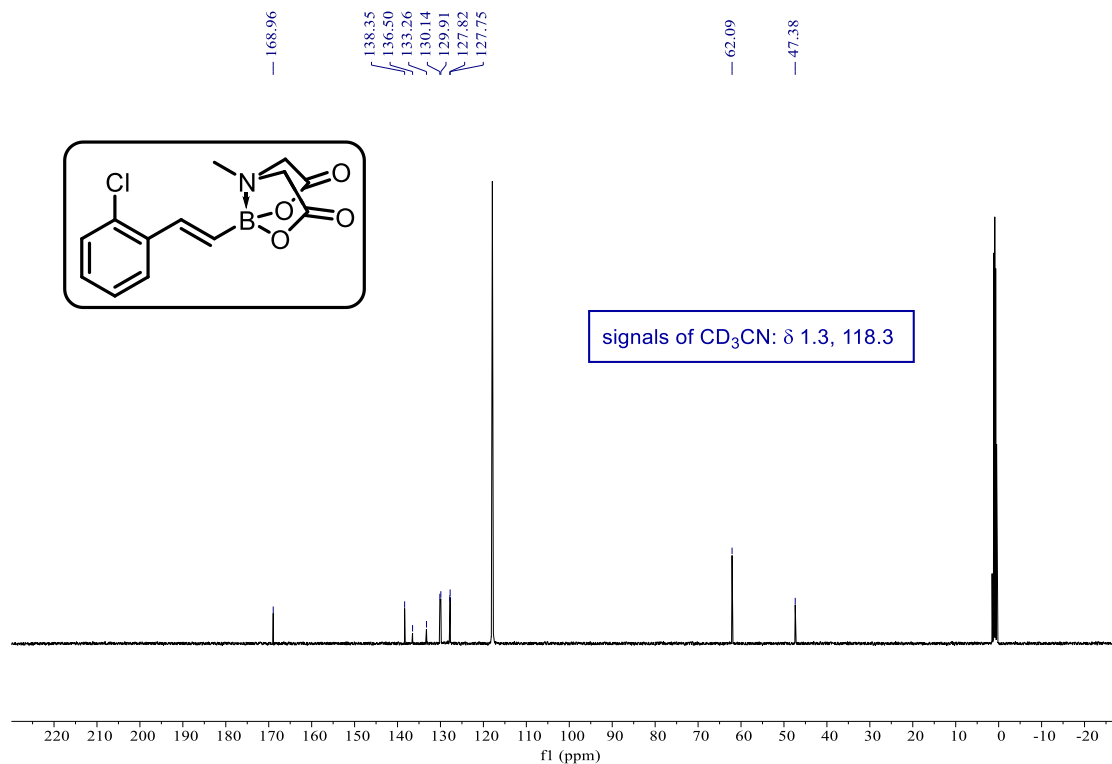

(*E*)-8-(2-bromostyryl)-4-methyldihydro- $\lambda^4,8\lambda^4$ -[1,3,2]oxazaborolo[2,3-*b*][1,3,2]oxazaborole-2,6(3*H*,5*H*)-dione (**18**)

$^1\text{H}$  NMR (400 MHz,  $\text{CD}_3\text{CN}$ )

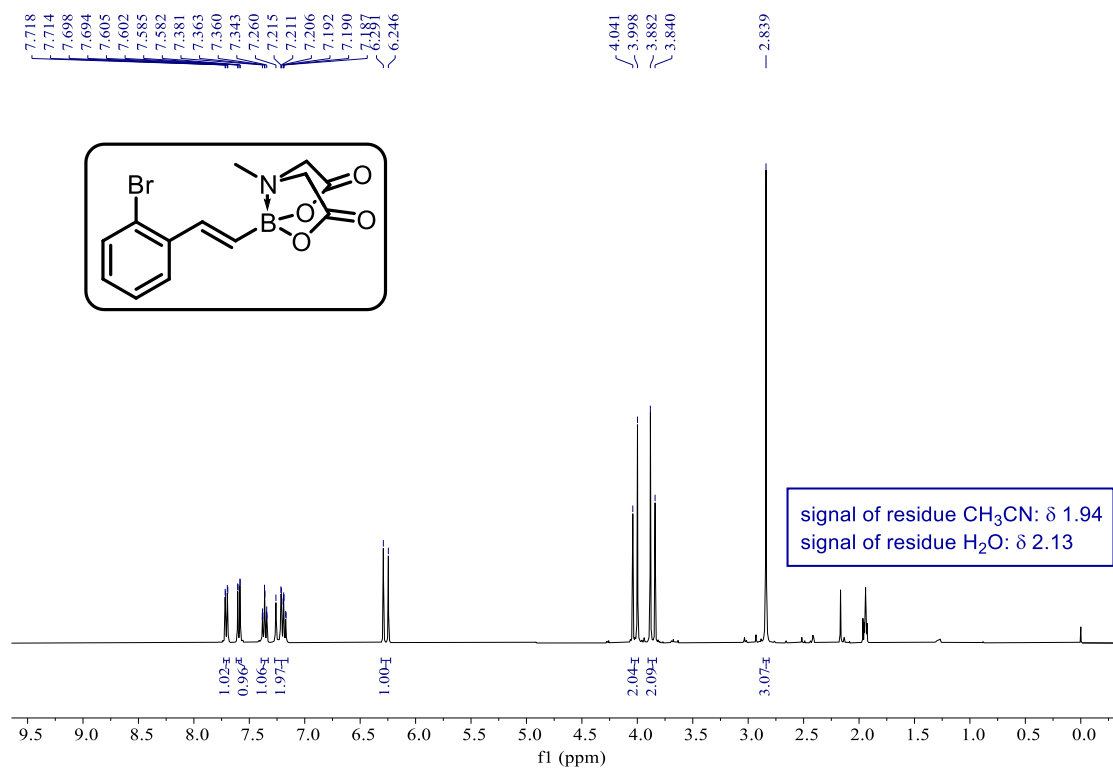

$^{13}\text{C}\{^1\text{H}\}$  NMR (100 MHz,  $\text{CD}_3\text{CN}$ )

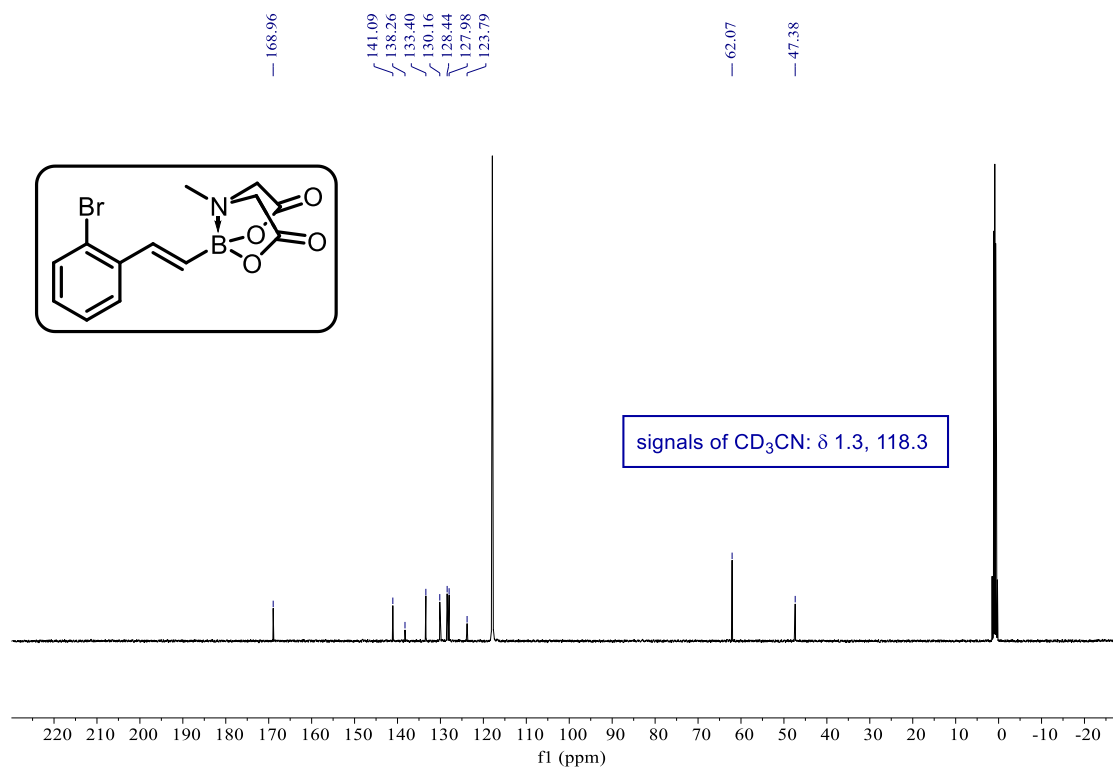

(*E*)-4-methyl-8-(2-methylstyryl)dihydro- $\lambda^4,8\lambda^4$ -[1,3,2]oxazaborolo[2,3-*b*][1,3,2]oxazaborole-2,6(3*H*,5*H*)-dione (**19**)

$^1\text{H}$  NMR (400 MHz,  $\text{CD}_3\text{CN}$ )

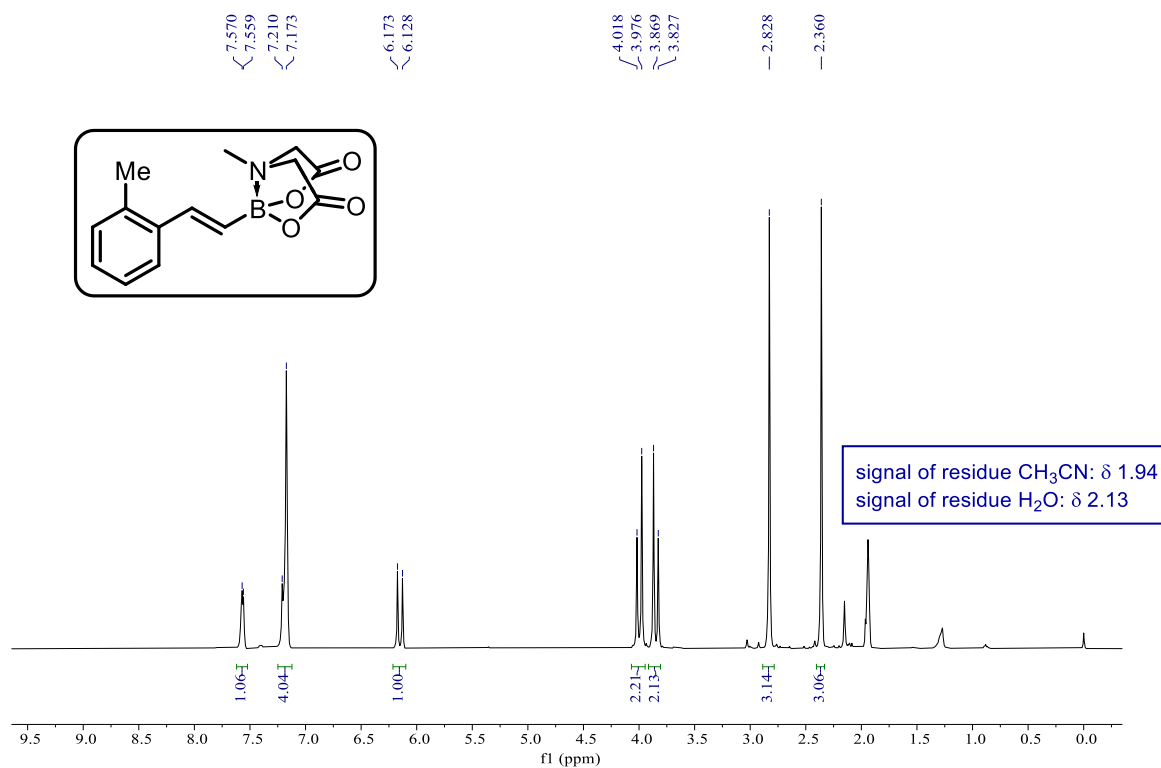

$^{13}\text{C}\{^1\text{H}\}$  NMR (100 MHz,  $\text{CD}_3\text{CN}$ )

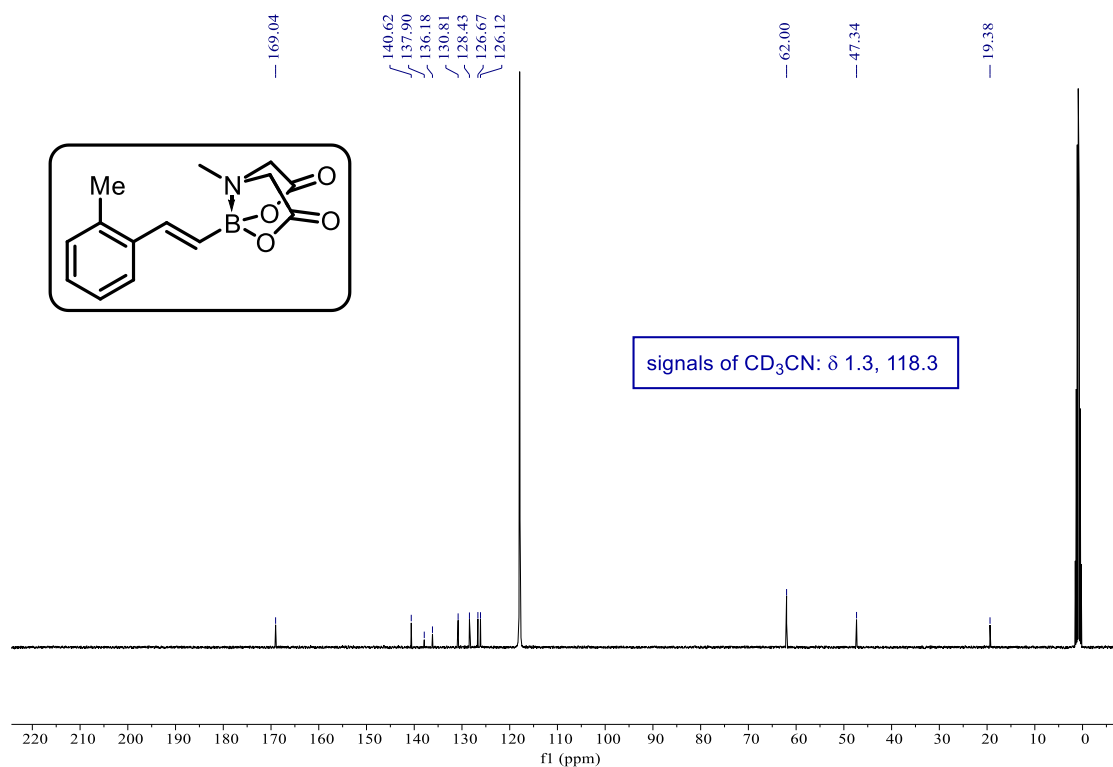

(*E*)-8-(3-fluorostyryl)-4-methyldihydro- $\lambda^4,8\lambda^4$ -[1,3,2]oxazaborolo[2,3-*b*][1,3,2]oxazaborole-2,6(3*H*,5*H*)-dione (**20**)

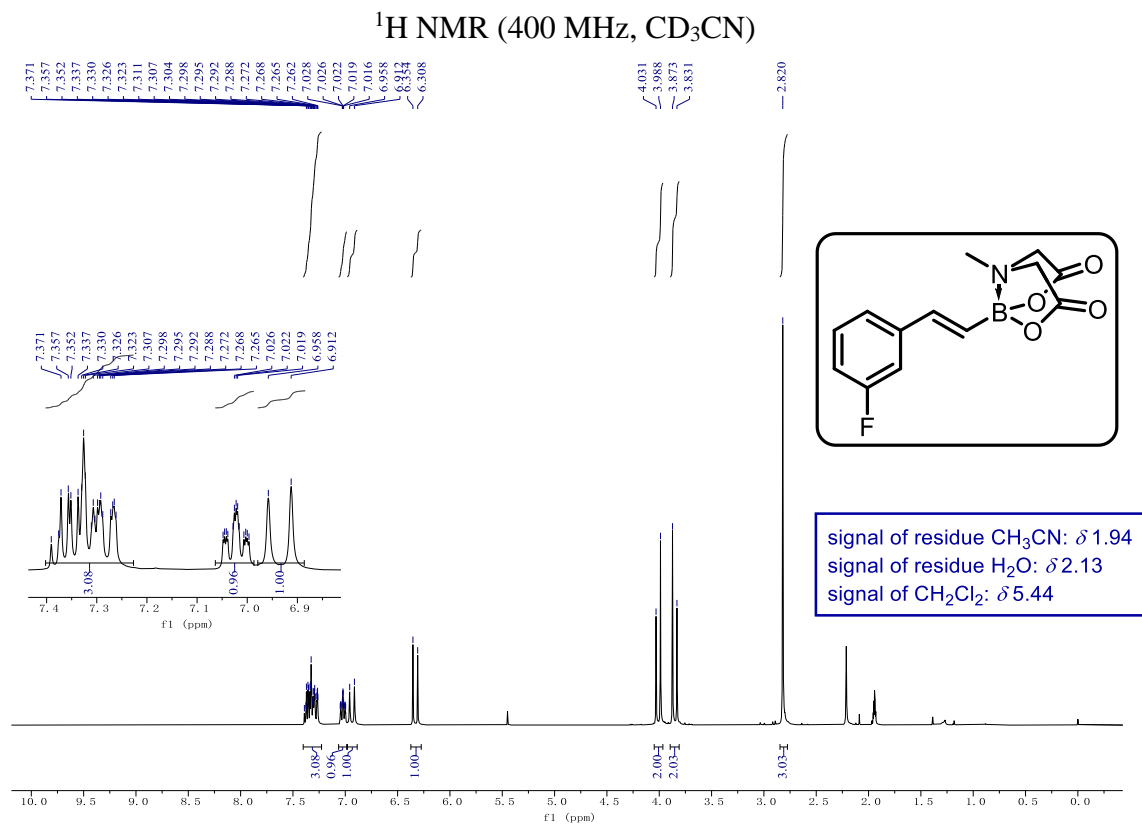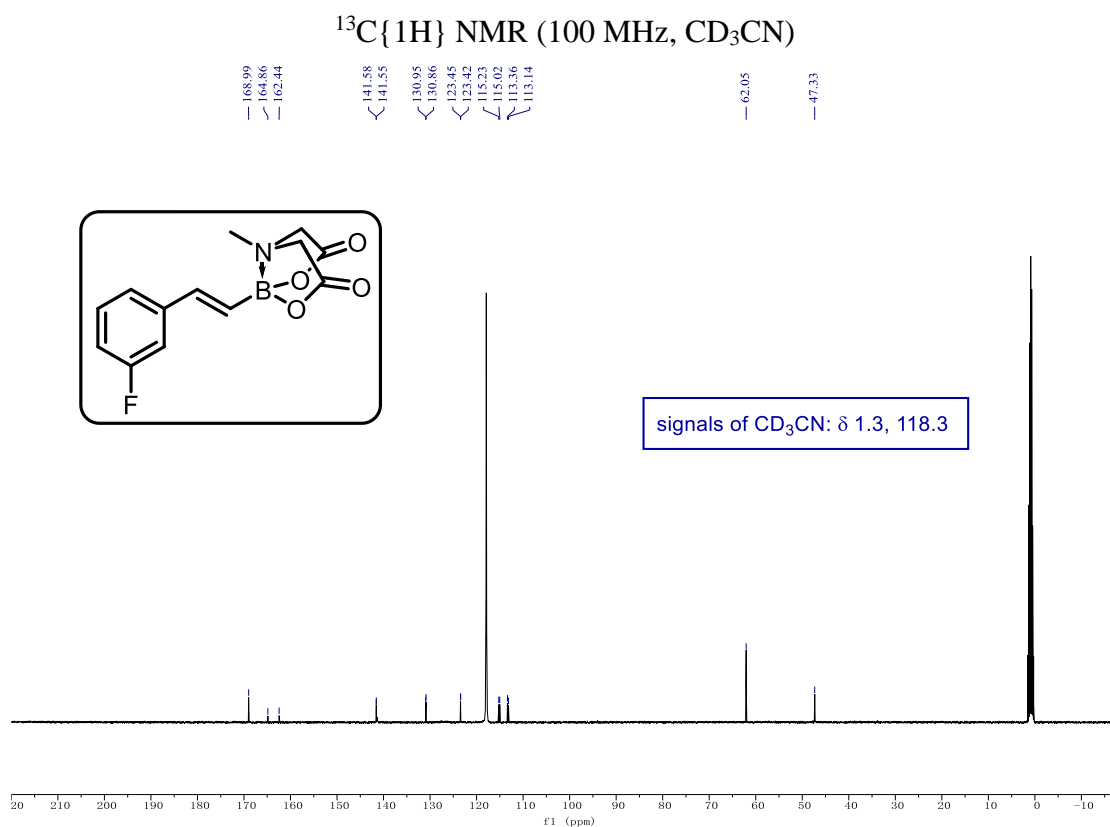

$^{19}\text{F}$  NMR (471 MHz,  $\text{CD}_3\text{CN}$ )

-115.3  
-115.4  
-115.4  
-115.4  
-115.4

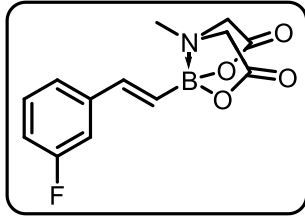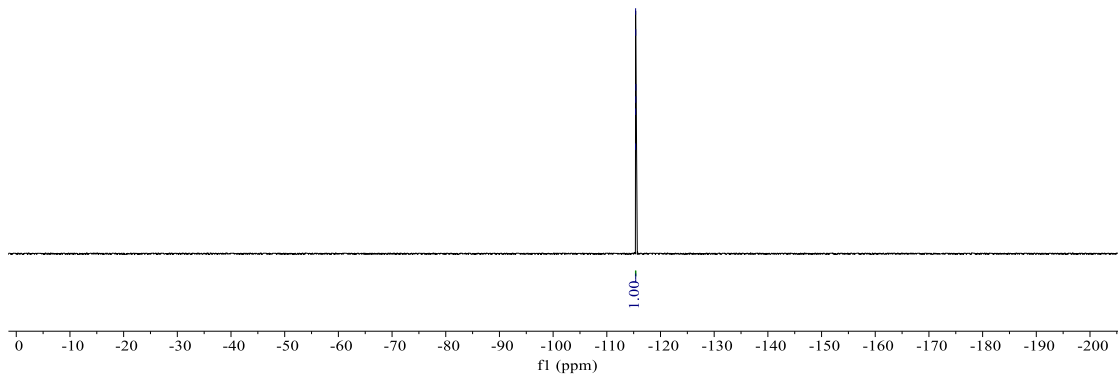

(*E*)-8-(3-chlorostyryl)-4-methyldihydro- $\lambda^4,8\lambda^4$ -[1,3,2]oxazaborolo[2,3-*b*][1,3,2]oxazaborole-2,6(3*H*,5*H*)-dione (**21**)

$^1\text{H}$  NMR (400 MHz,  $\text{CD}_3\text{CN}$ )

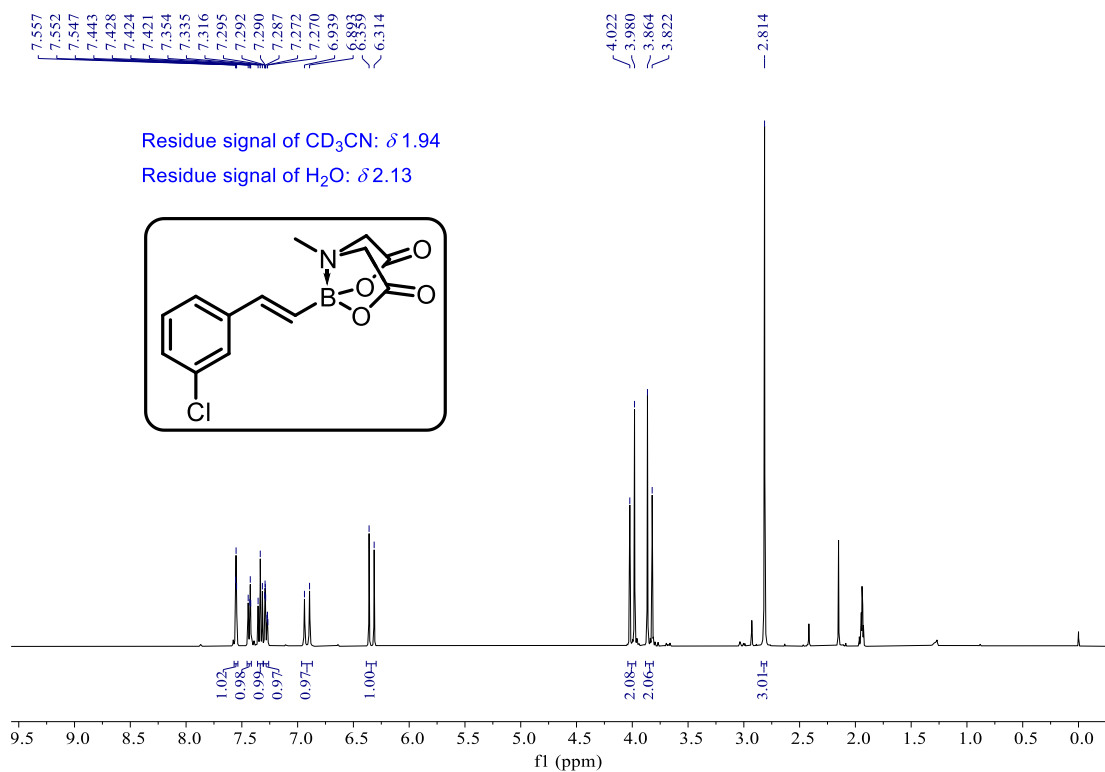

$^{13}\text{C}\{^1\text{H}\}$  NMR (100 MHz,  $\text{CD}_3\text{CN}$ )

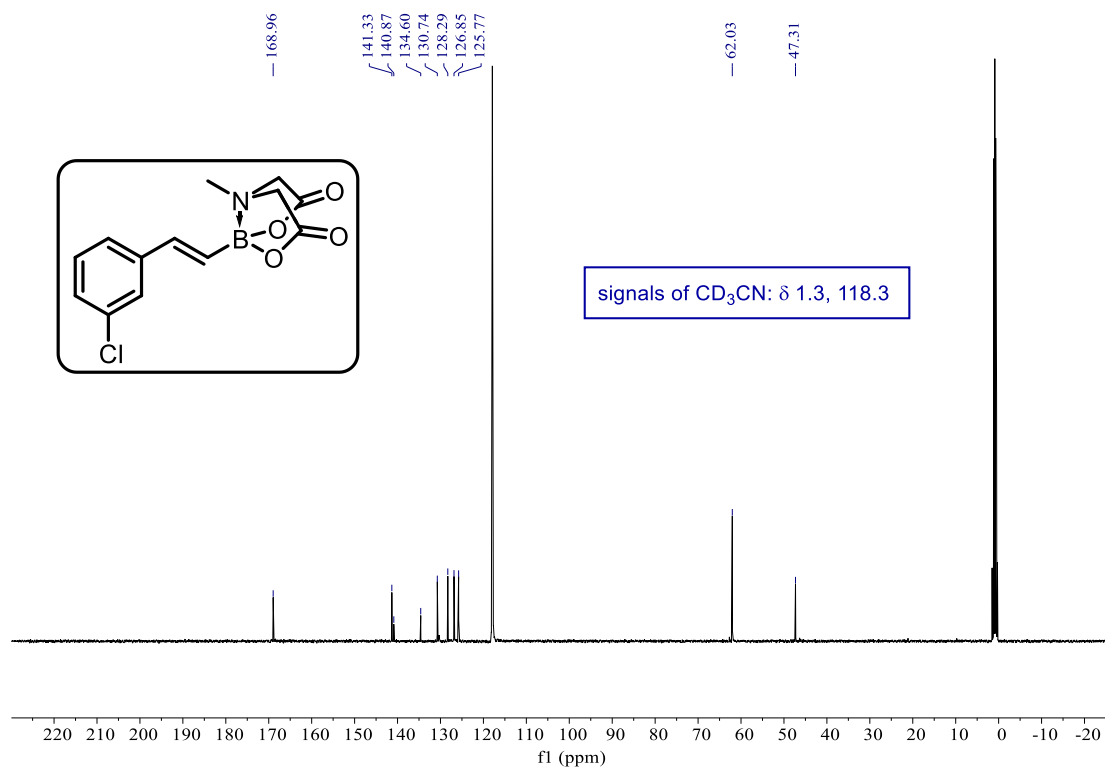

(*E*)-8-(3-bromostyryl)-4-methyldihydro- $\lambda^4,8\lambda^4$ -[1,3,2]oxazaborolo[2,3-*b*][1,3,2]oxazaborole-2,6(3*H*,5*H*)-dione (**22**)

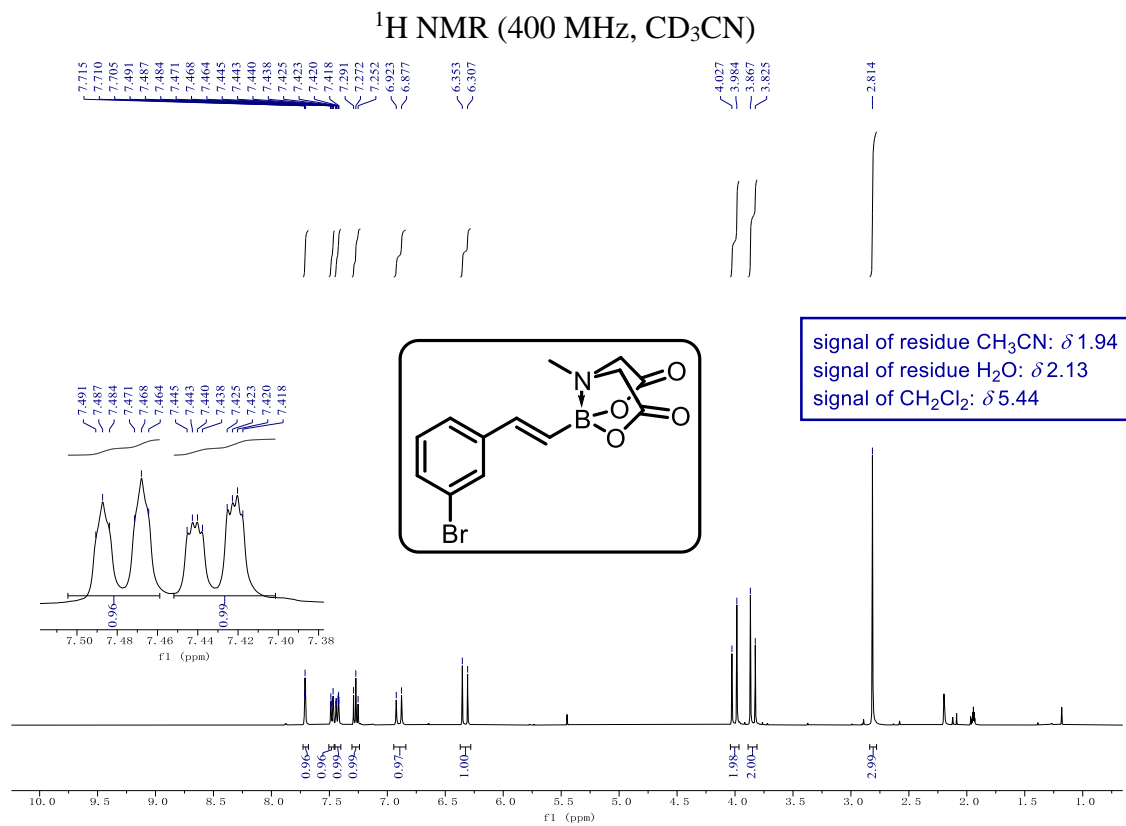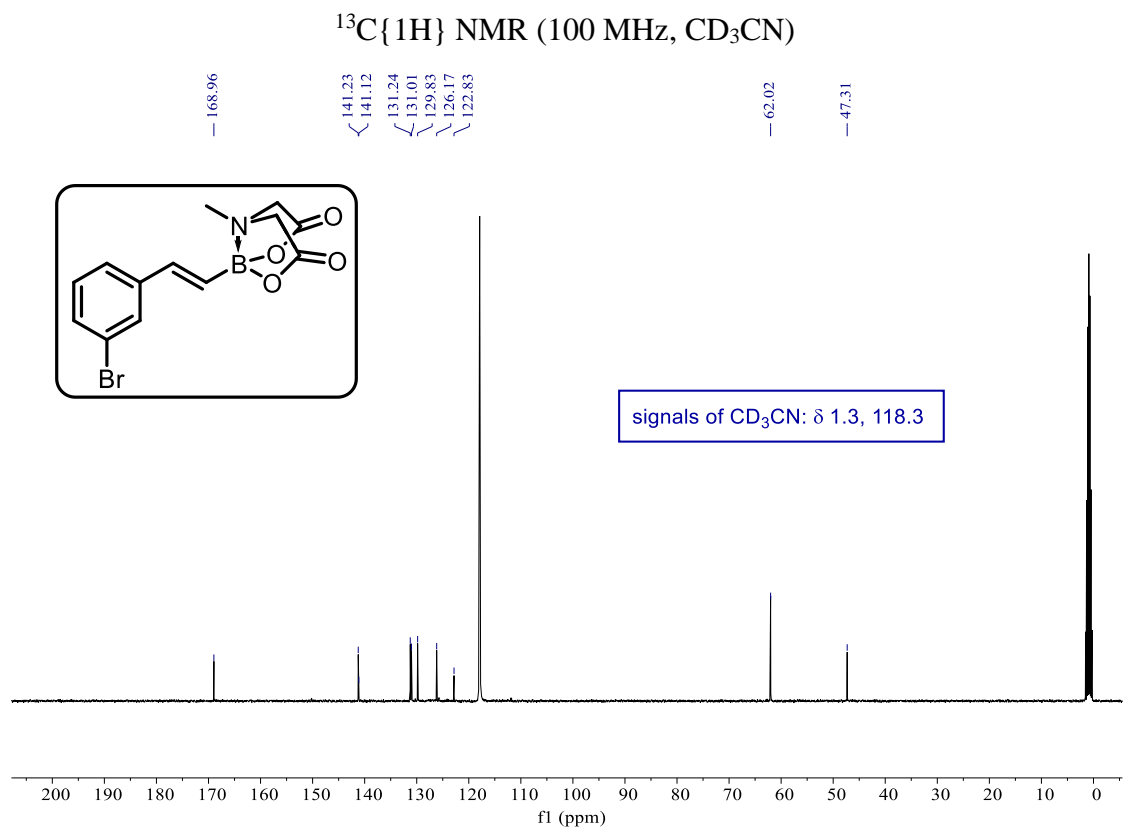

(*E*)-3-(2-(4-methyl-2,6-dioxotetrahydro-2*H*- $\lambda^4,8\lambda^4$ -[1,3,2]oxazaborolo[2,3-*b*][1,3,2]oxazaborol-8-yl)vinyl)benzonitrile (**23**)

$^1\text{H}$  NMR (400 MHz,  $\text{CD}_3\text{CN}$ )

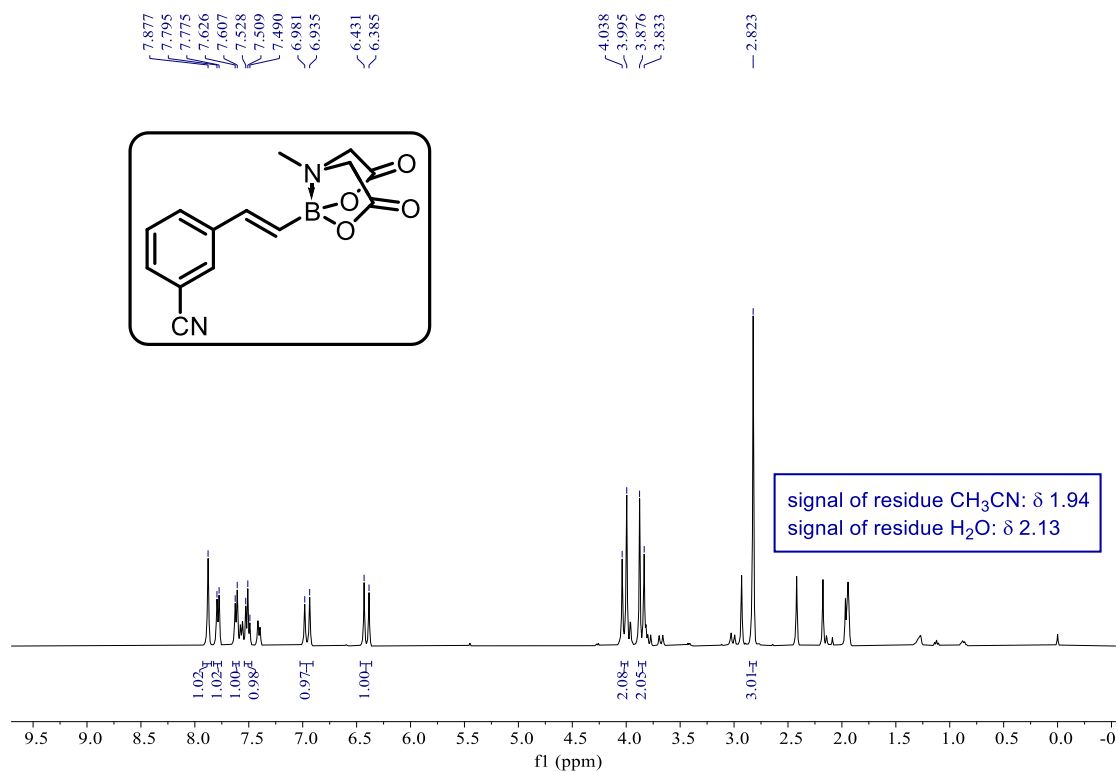

$^{13}\text{C}\{^1\text{H}\}$  NMR (100 MHz,  $\text{CD}_3\text{CN}$ )

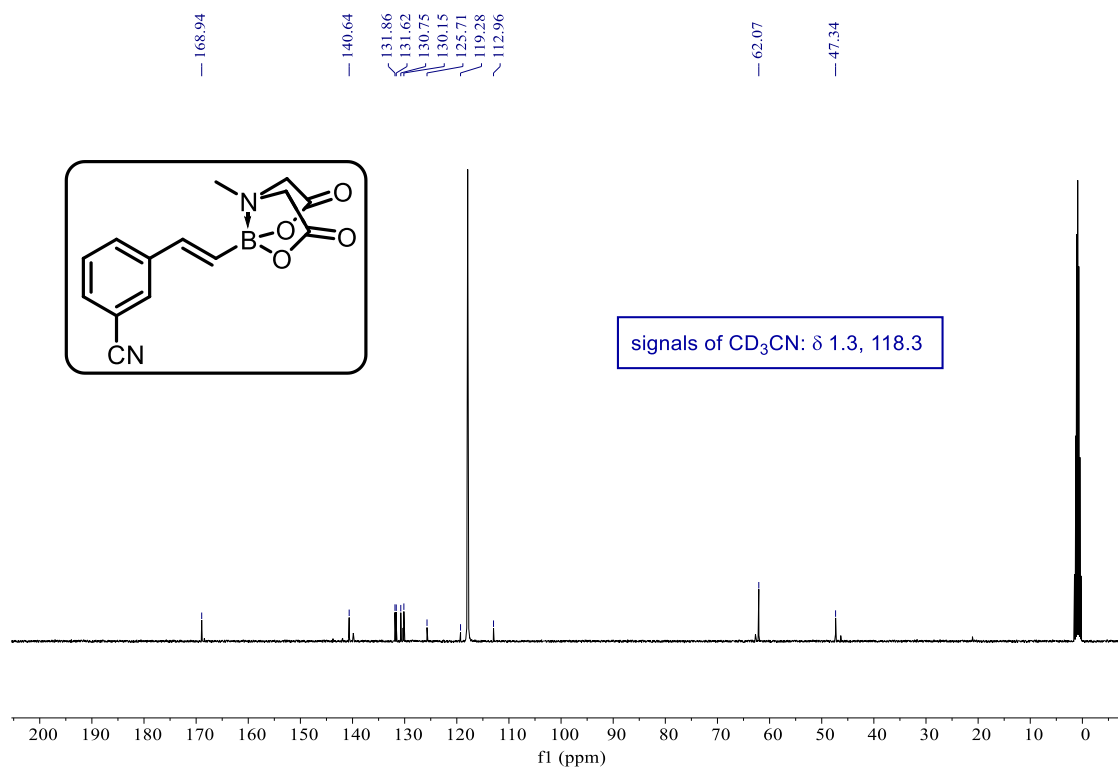



(*E*)-4-methyl-8-(3-methylstyryl)dihydro- $\lambda^4,8\lambda^4$ -[1,3,2]oxazaborolo[2,3-*b*][1,3,2]oxazaborole-2,6(3*H*,5*H*)-dione (**24**)

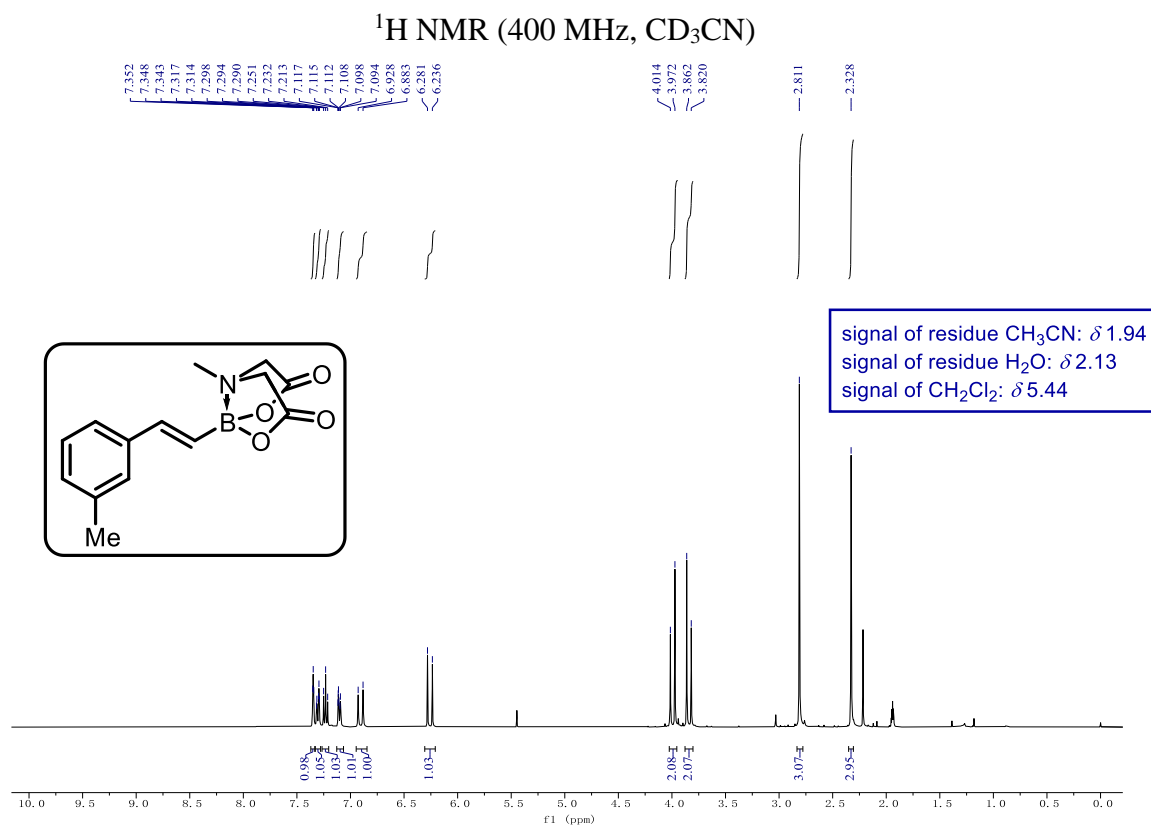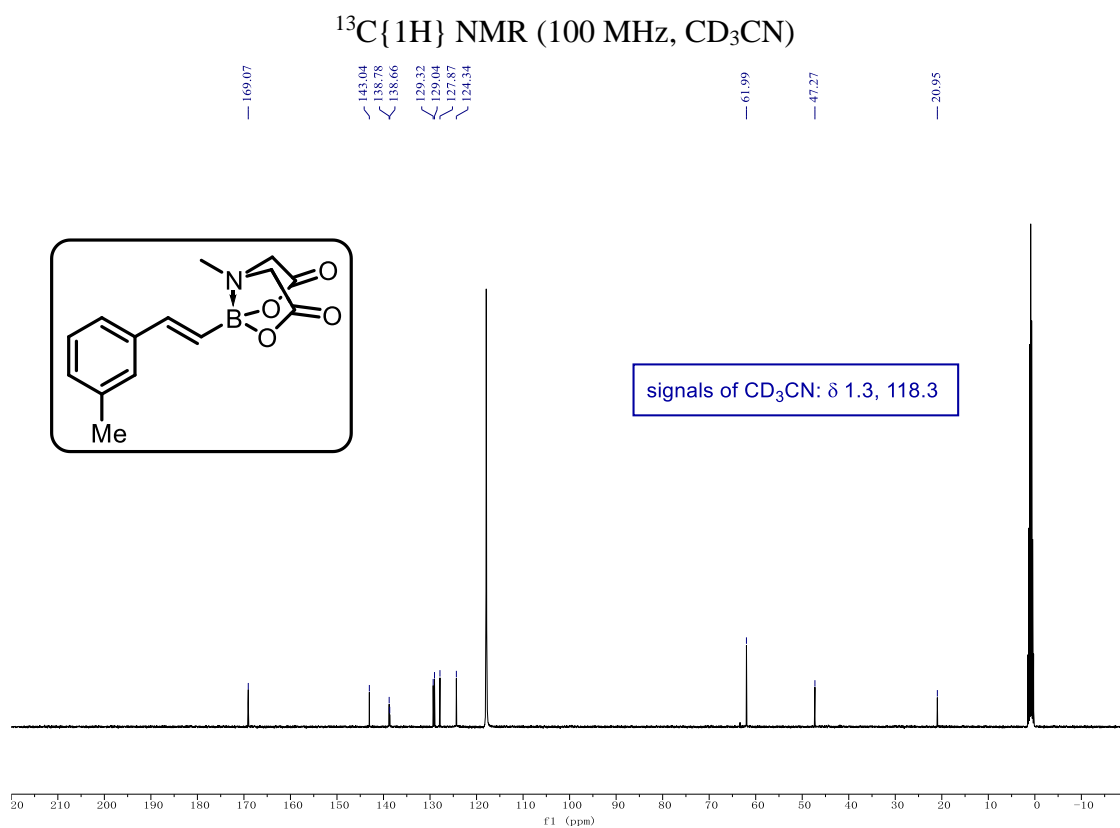

(*E*)-8-(3-methoxystyryl)-4-methyldihydro- $\lambda^4,8\lambda^4$ -[1,3,2]oxazaborolo[2,3-*b*][1,3,2]oxa-  
zaborole-2,6(3*H*,5*H*)-dione (**25**)

$^1\text{H}$  NMR (400 MHz,  $\text{CD}_3\text{CN}$ )

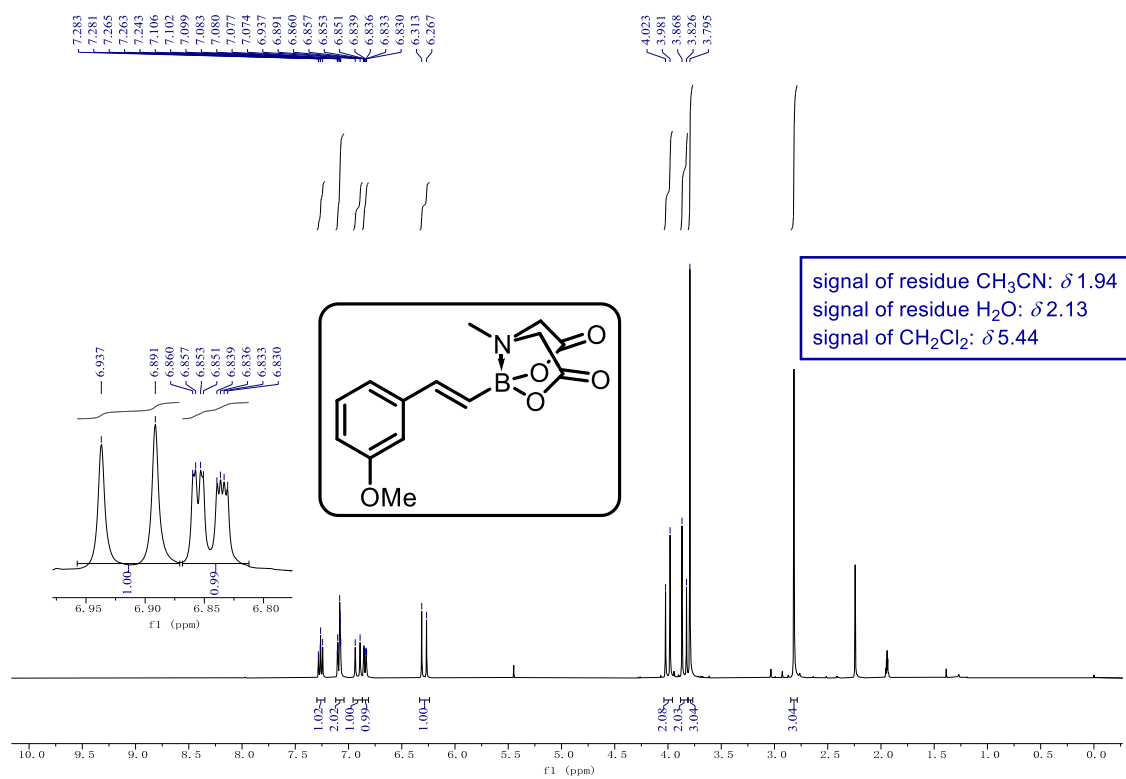

$^{13}\text{C}\{^1\text{H}\}$  NMR (100 MHz,  $\text{CD}_3\text{CN}$ )

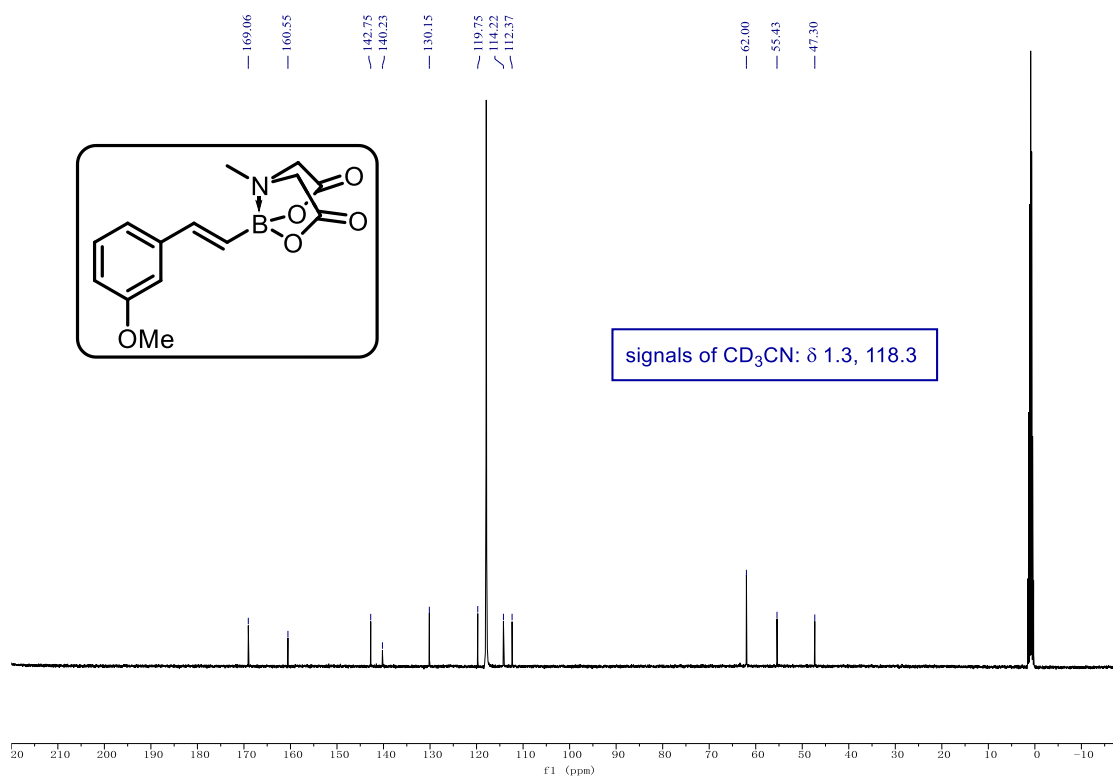

(*E*)-4-methyl-8-(2-(naphthalen-2-yl)vinyl)dihydro- $\lambda^4,8\lambda^4$ -[1,3,2]oxazaborolo[2,3-*b*][1,3,2]oxazaborole-2,6(3*H*,5*H*)-dione (**26**)

$^1\text{H}$  NMR (400 MHz,  $\text{CD}_3\text{CN}$ )

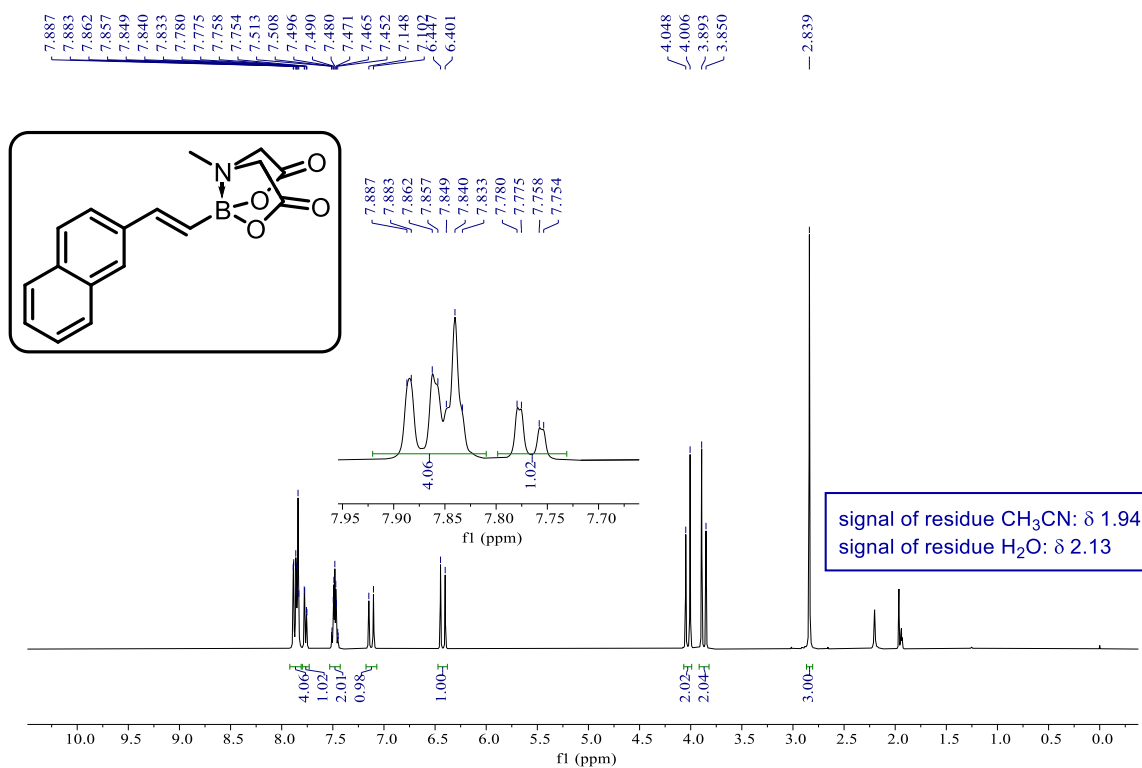

$^{13}\text{C}\{^1\text{H}\}$  NMR (100 MHz,  $\text{CD}_3\text{CN}$ )

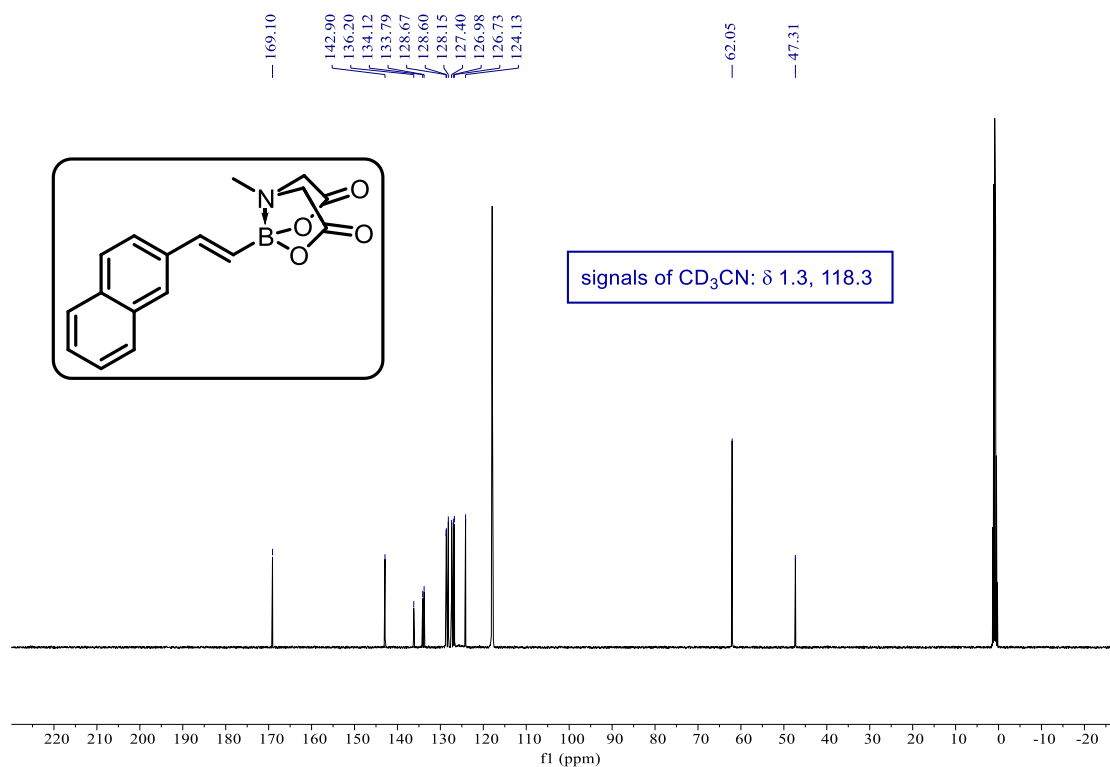

(*E*)-4-methyl-8-(2-(thiophen-3-yl)vinyl)dihydro- $\lambda^4,8\lambda^4$ -[1,3,2]oxazaborolo[2,3-*b*][1,3,2]oxazaborole-2,6(3*H*,5*H*)-dione (**27**)

$^1\text{H}$  NMR (400 MHz,  $\text{CD}_3\text{CN}$ )

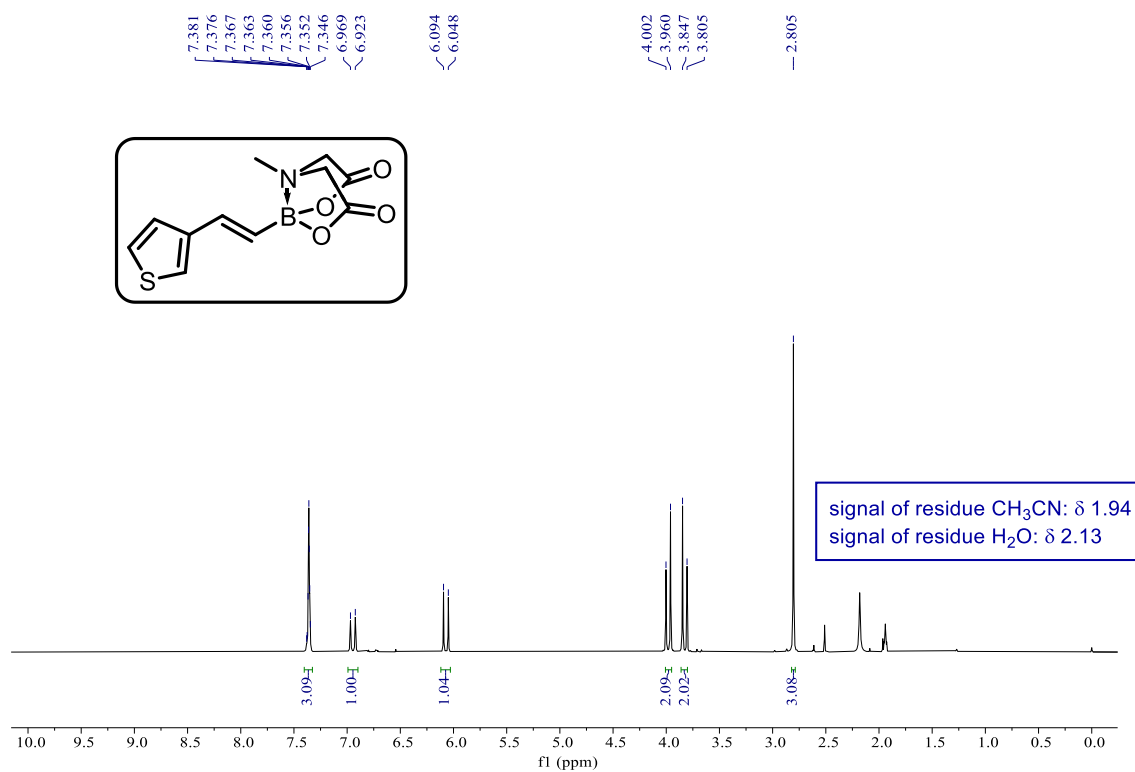

$^{13}\text{C}\{^1\text{H}\}$  NMR (100 MHz,  $\text{CD}_3\text{CN}$ )

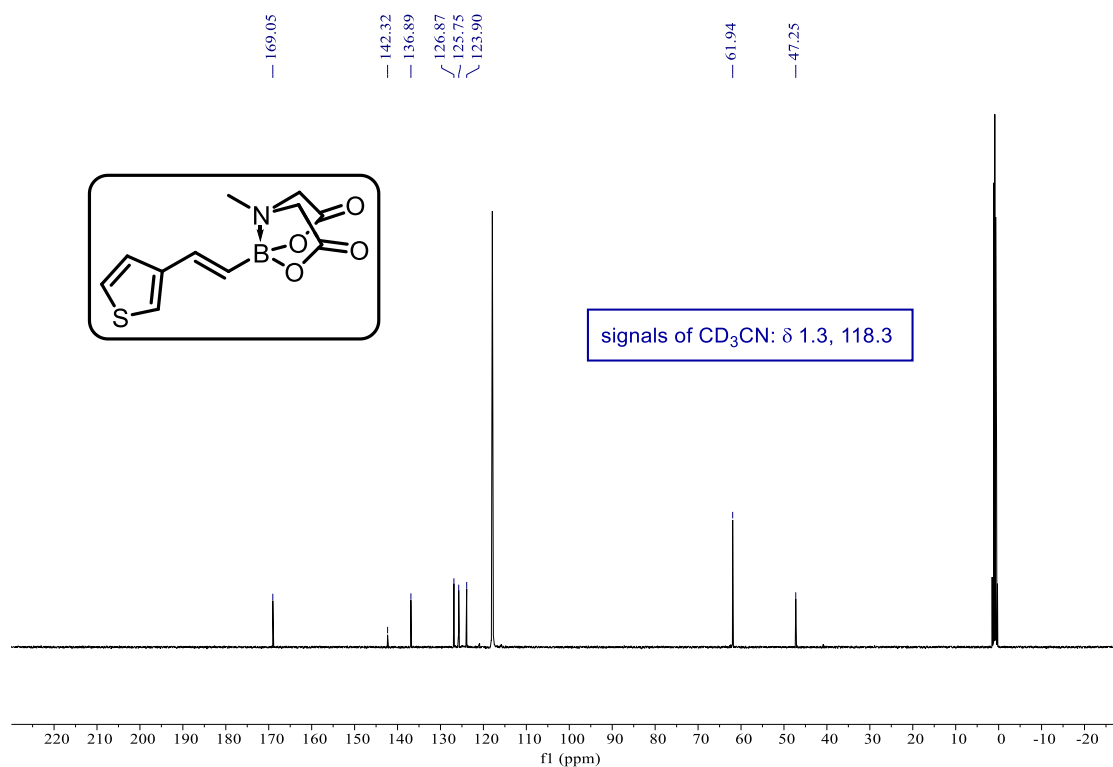

*(E)*-8-(2-bromo-5-fluorostyryl)-4-methyldihydro- $\lambda^4,8\lambda^4$ -[1,3,2]oxazaborolo[2,3-*b*][1,3,2]oxazaborole-2,6(3*H*,5*H*)-dione (**28**)

$^1\text{H}$  NMR (400 MHz,  $\text{CD}_3\text{CN}$ )

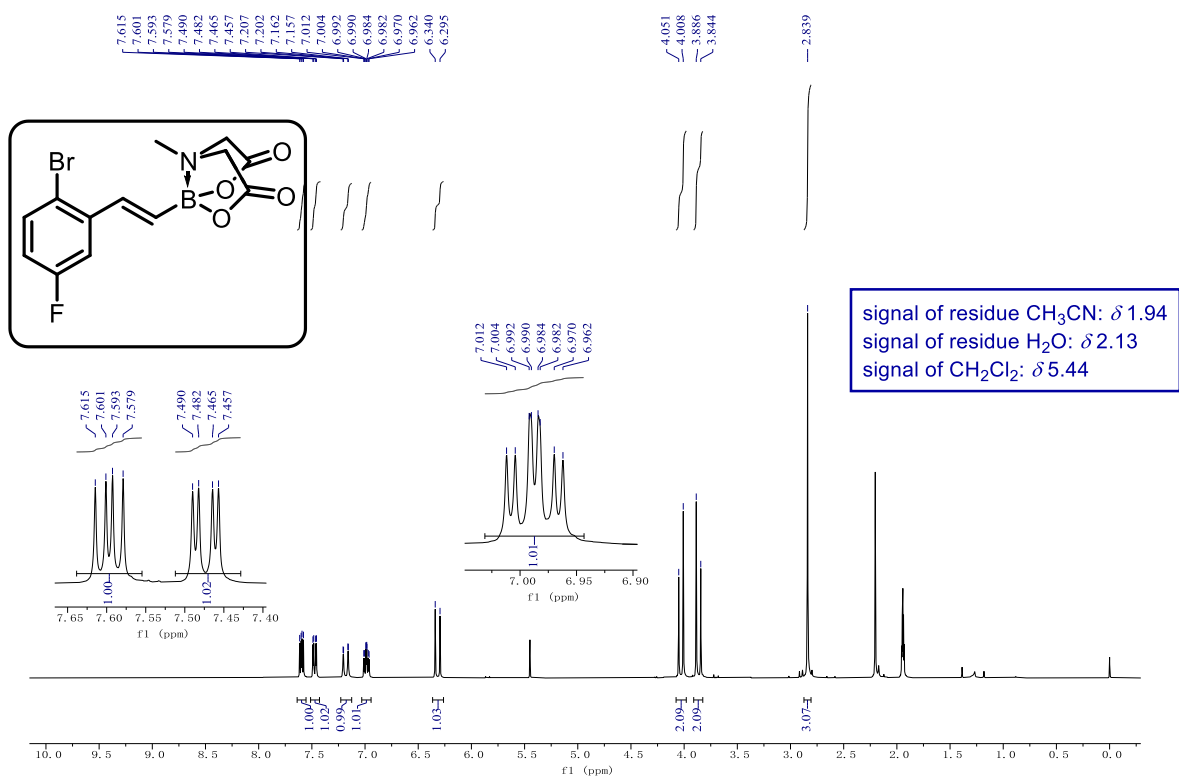

$^{13}\text{C}\{^1\text{H}\}$  NMR (100 MHz,  $\text{CD}_3\text{CN}$ )

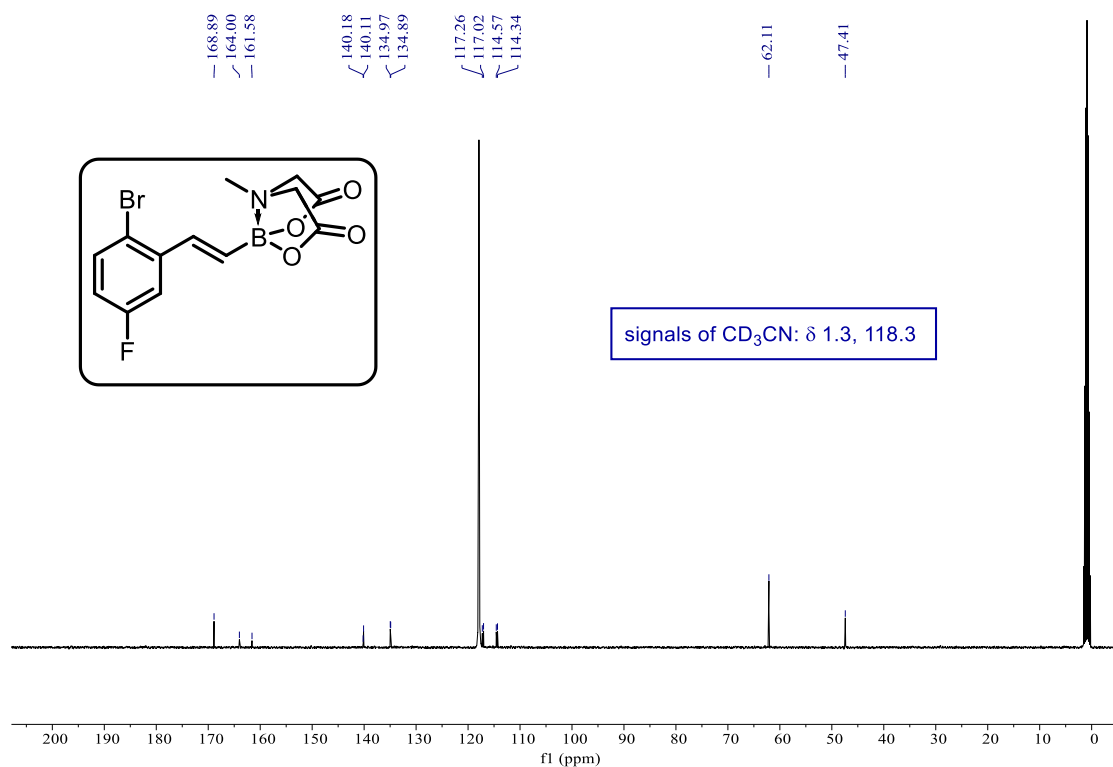

$^{19}\text{F}$  NMR (471 MHz,  $\text{CD}_3\text{CN}$ )

-116.30  
-116.32  
-116.33  
-116.35

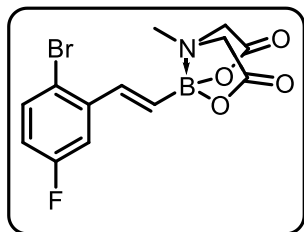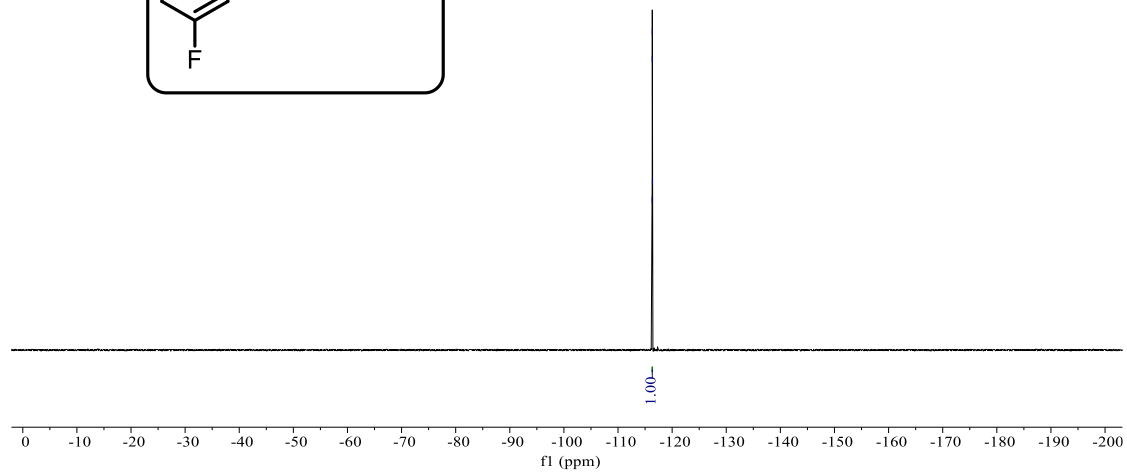

(*E*)-8-(3,5-dichlorostyryl)-4-methyldihydro- $\lambda^4,8\lambda^4$ -[1,3,2]oxazaborolo[2,3-*b*][1,3,2]oxazaborole-2,6(3*H*,5*H*)-dione (**29**)

$^1\text{H}$  NMR (400 MHz,  $\text{CD}_3\text{CN}$ )

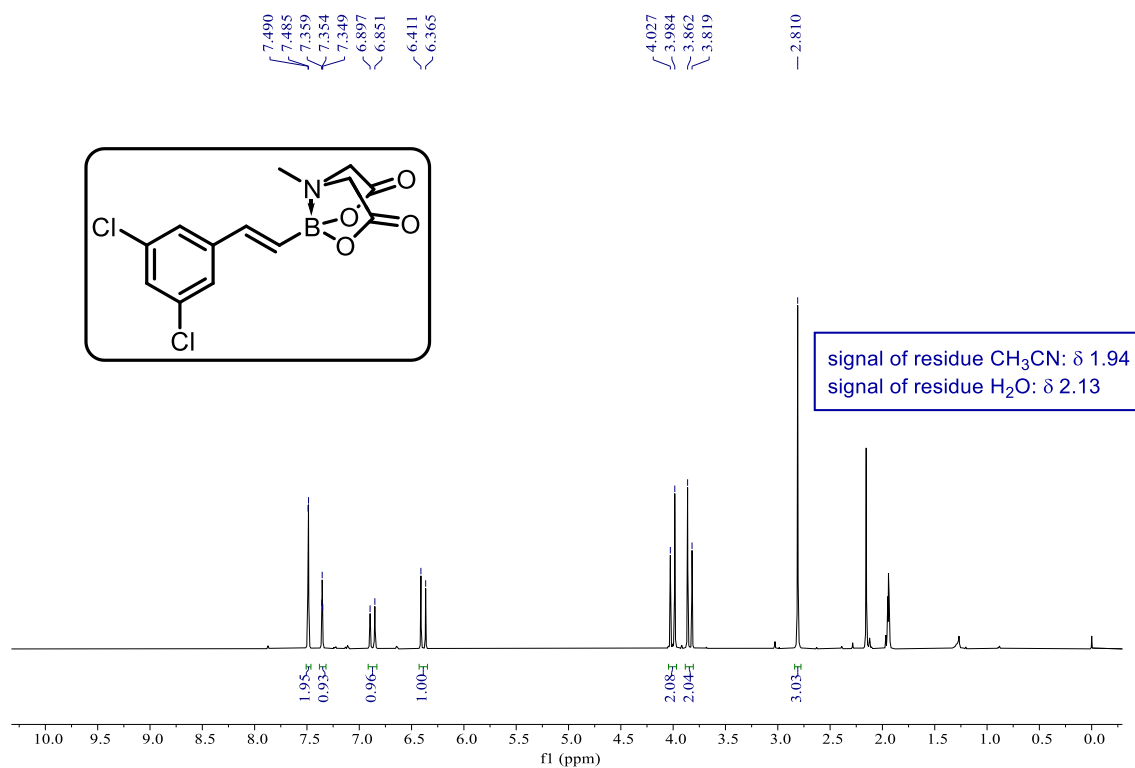

$^{13}\text{C}\{^1\text{H}\}$  NMR (100 MHz,  $\text{CD}_3\text{CN}$ )

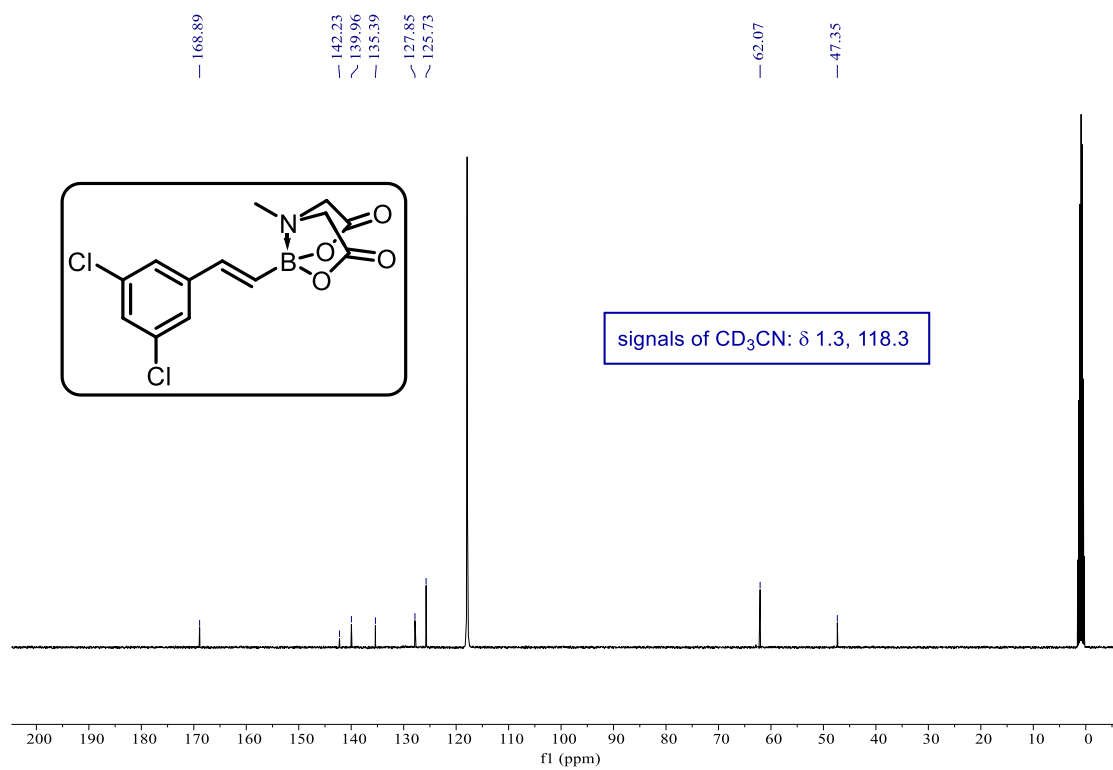

(*E*)-8-(3,5-bis(trifluoromethyl)styryl)-4-methyldihydro- $\lambda^4,8\lambda^4$ -[1,3,2]oxazaborolo[2,3-*b*][1,3,2]oxazaborole-2,6(3*H*,5*H*)-dione (**30**)

$^1\text{H}$  NMR (400 MHz,  $\text{CD}_3\text{CN}$ )

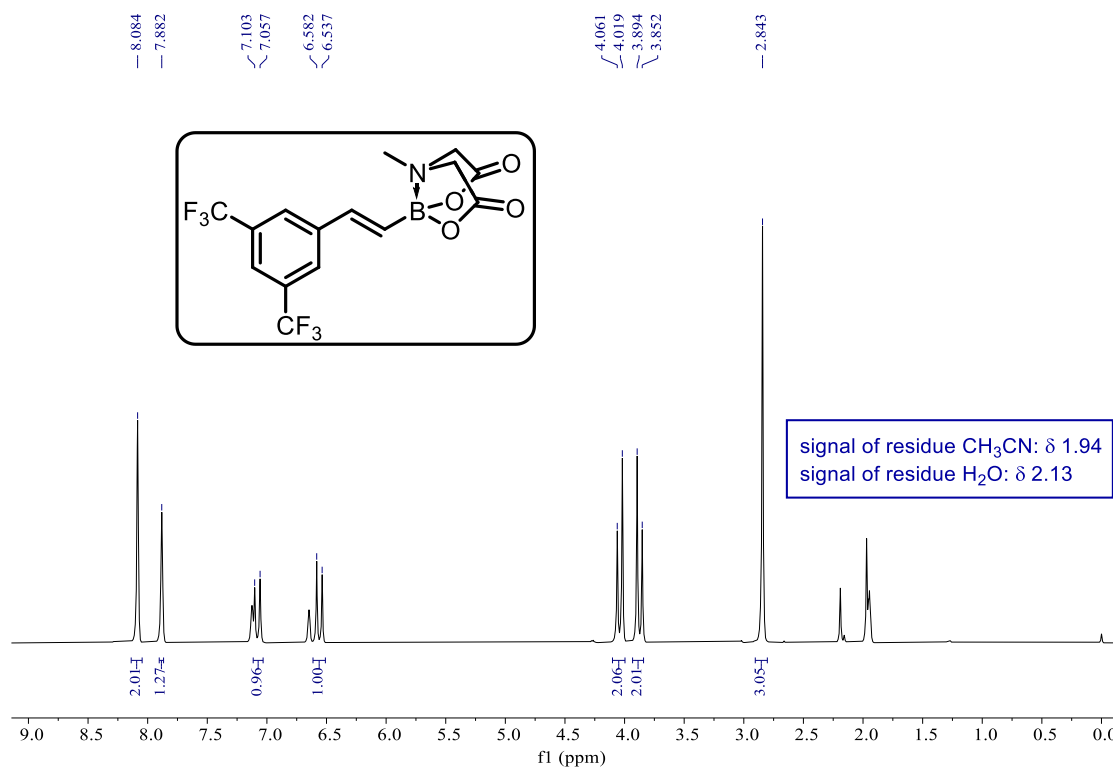

$^{13}\text{C}\{^1\text{H}\}$  NMR (100 MHz,  $\text{CD}_3\text{CN}$ )

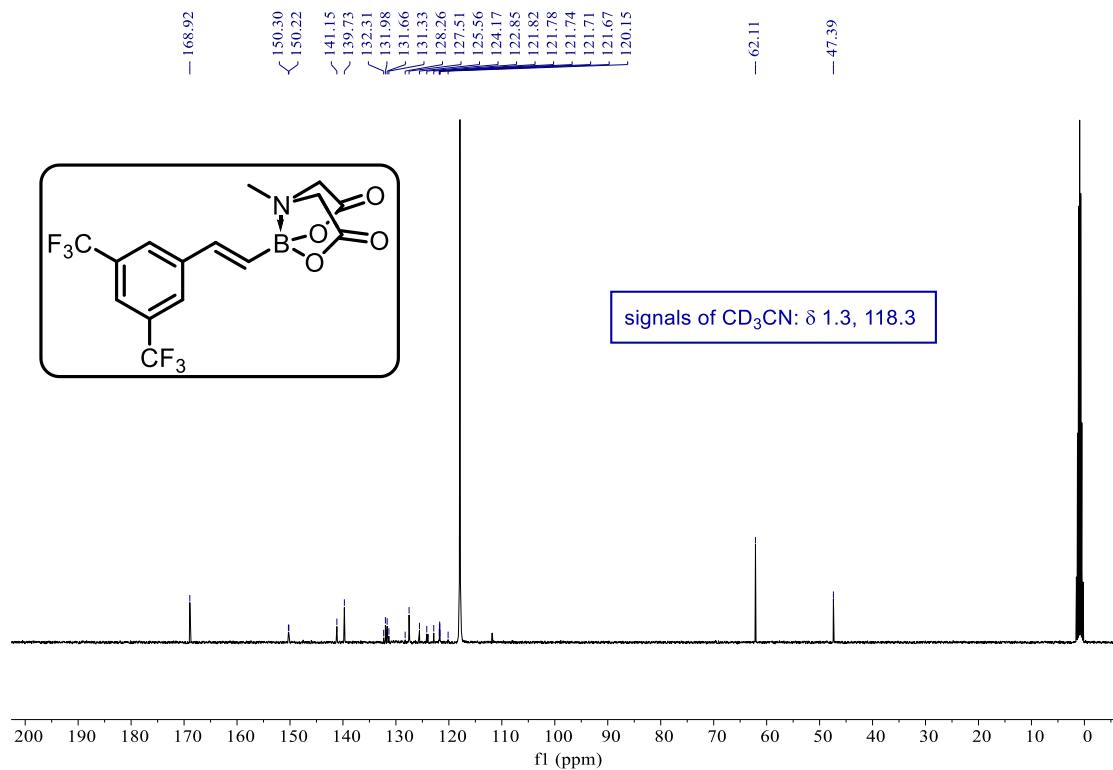



$^{19}\text{F}$  NMR (471 MHz,  $\text{CD}_3\text{CN}$ )

— 63.4

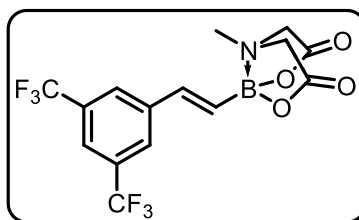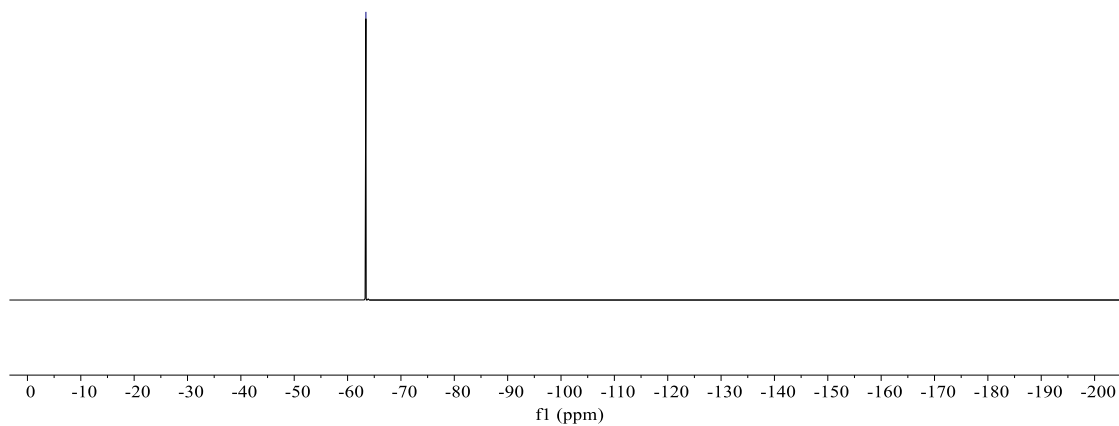

(*E*)-8-(3,5-dimethylstyryl)-4-methyldihydro- $\lambda^4,8\lambda^4$ -[1,3,2]oxazaborolo[2,3-*b*][1,3,2]oxazaborole-2,6(3*H*,5*H*)-dione (**31**)

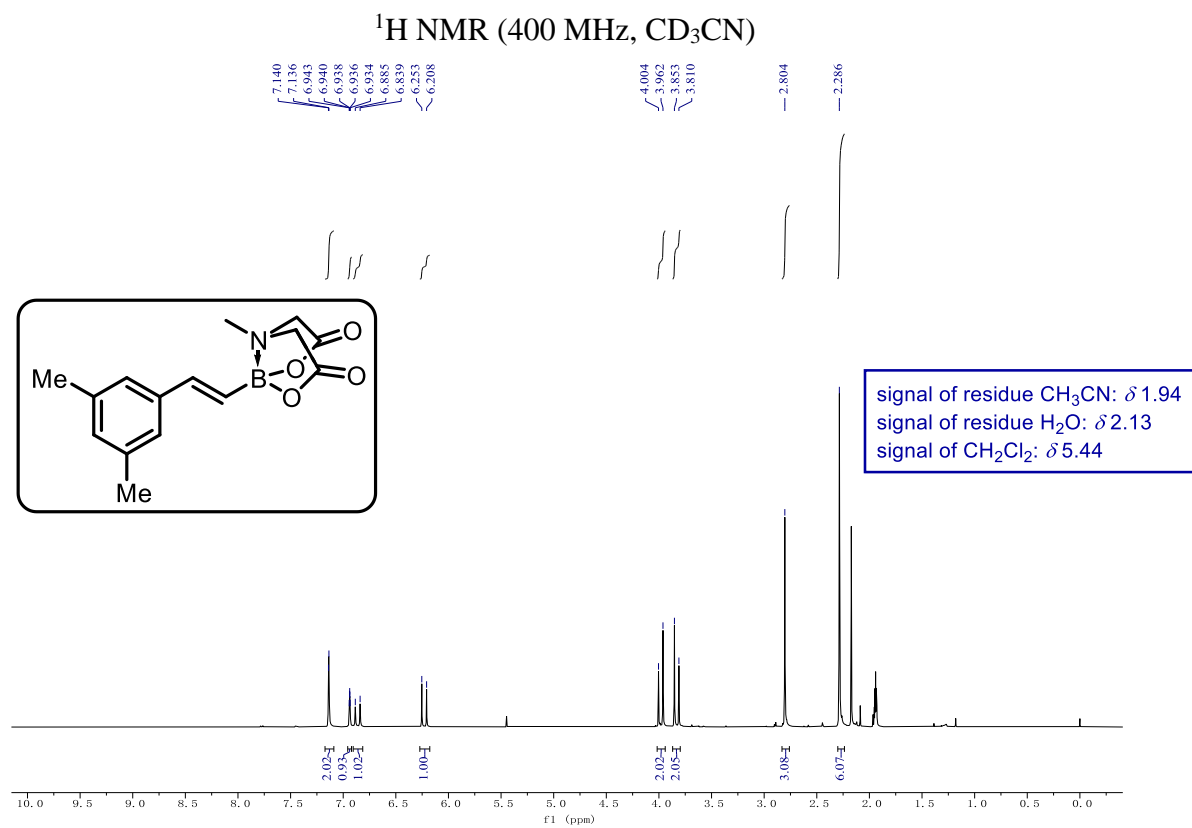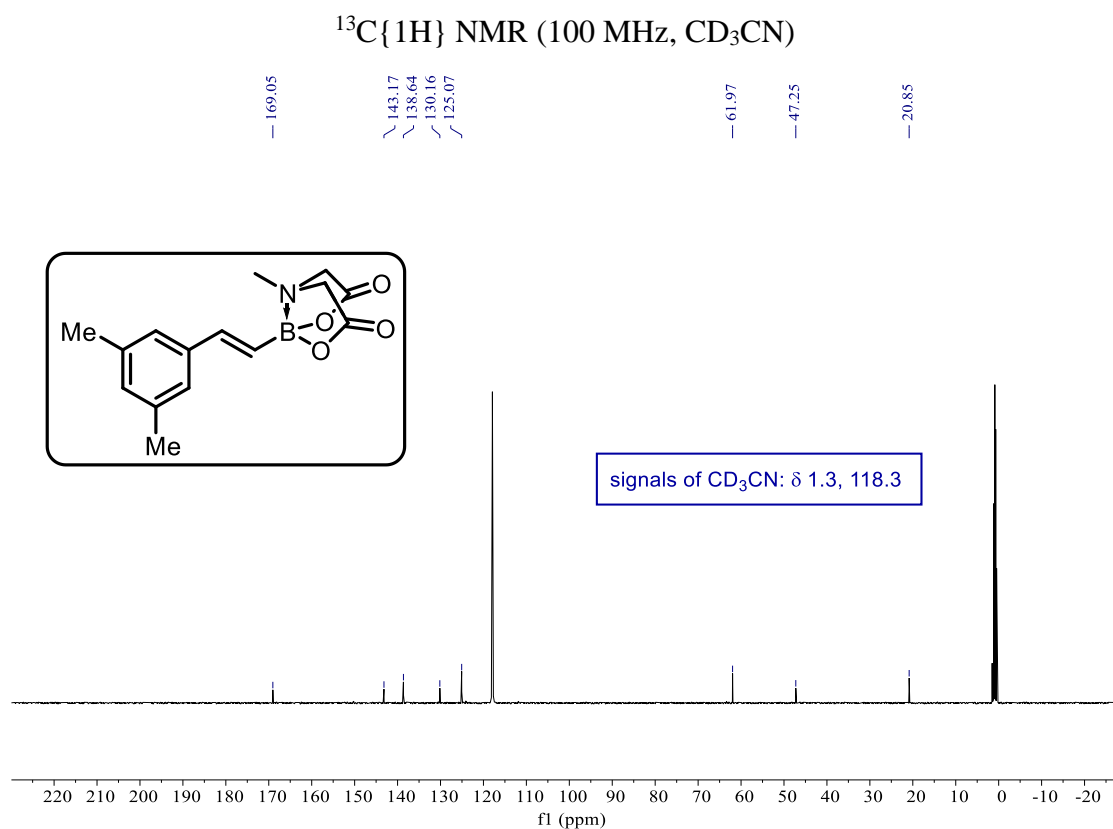

(*E*)-1,2-diphenylethene (**32**)

$^1\text{H}$  NMR (400 MHz,  $\text{CDCl}_3$ )

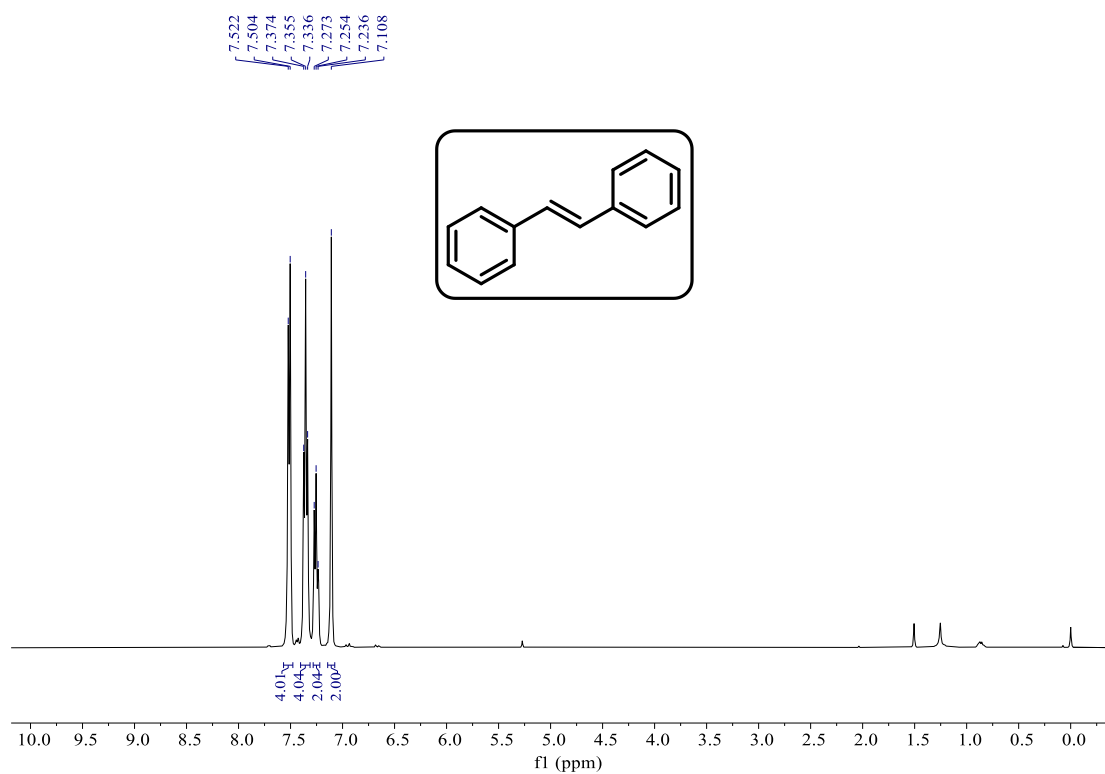

$^{13}\text{C}\{^1\text{H}\}$  NMR (100 MHz,  $\text{CDCl}_3$ )

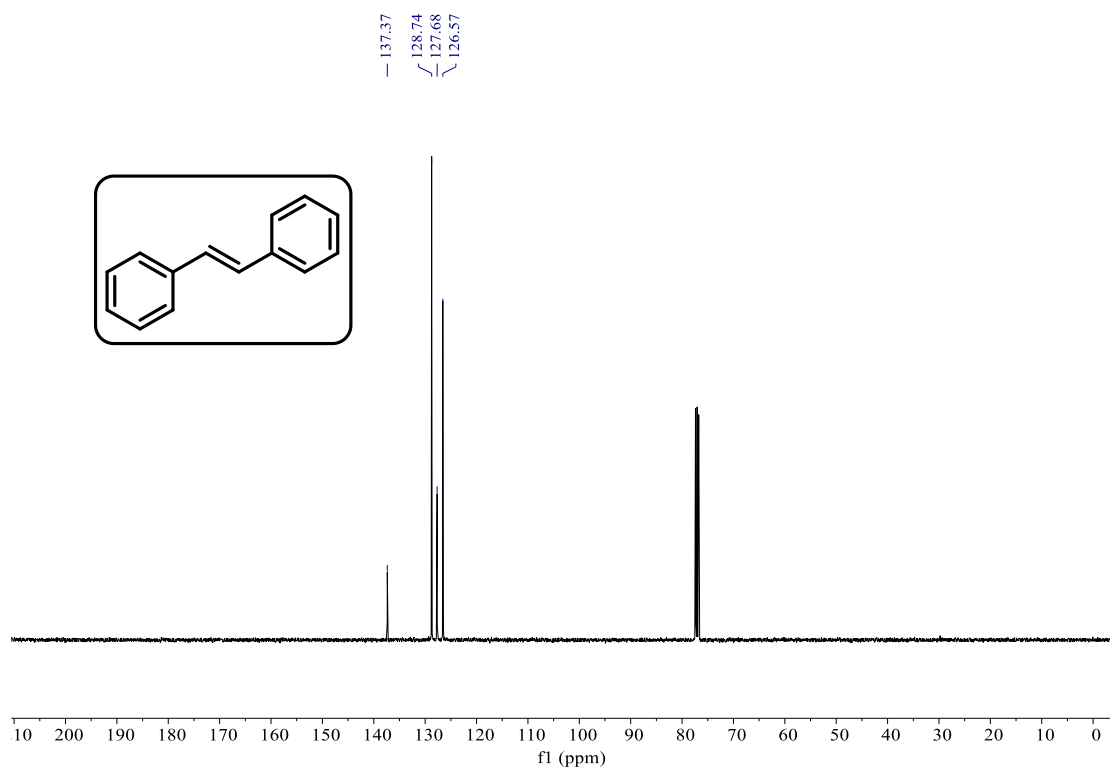

(E)-2-Styrylfuran (**33**)

$^1\text{H}$  NMR (400 MHz,  $\text{CDCl}_3$ )

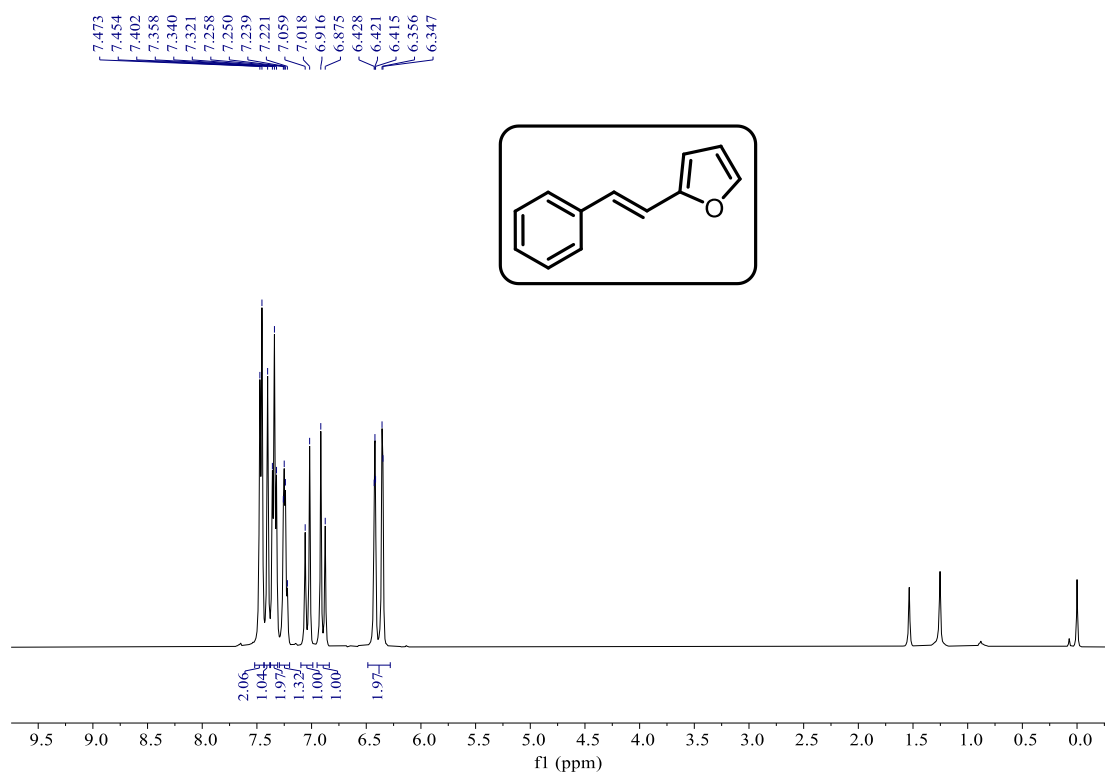

$^{13}\text{C}\{^1\text{H}\}$  NMR (100 MHz,  $\text{CDCl}_3$ )

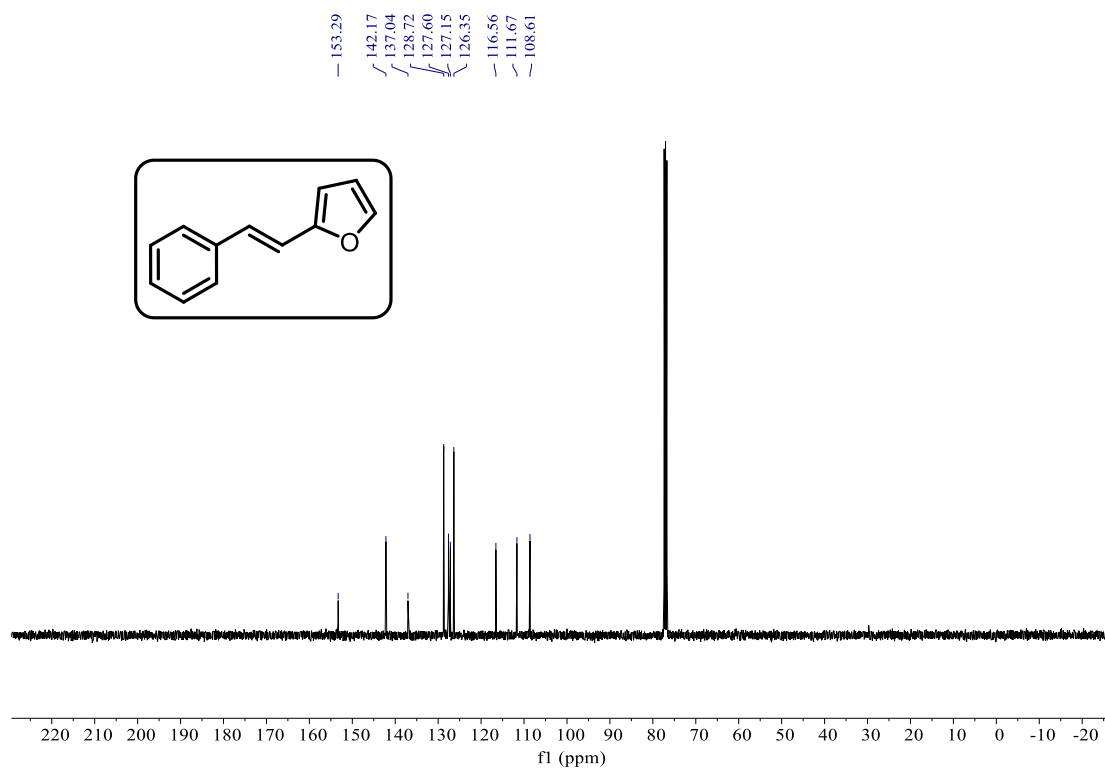

(E)-3-styrylthiophene (**34**)

$^1\text{H}$  NMR (400 MHz,  $\text{CDCl}_3$ )

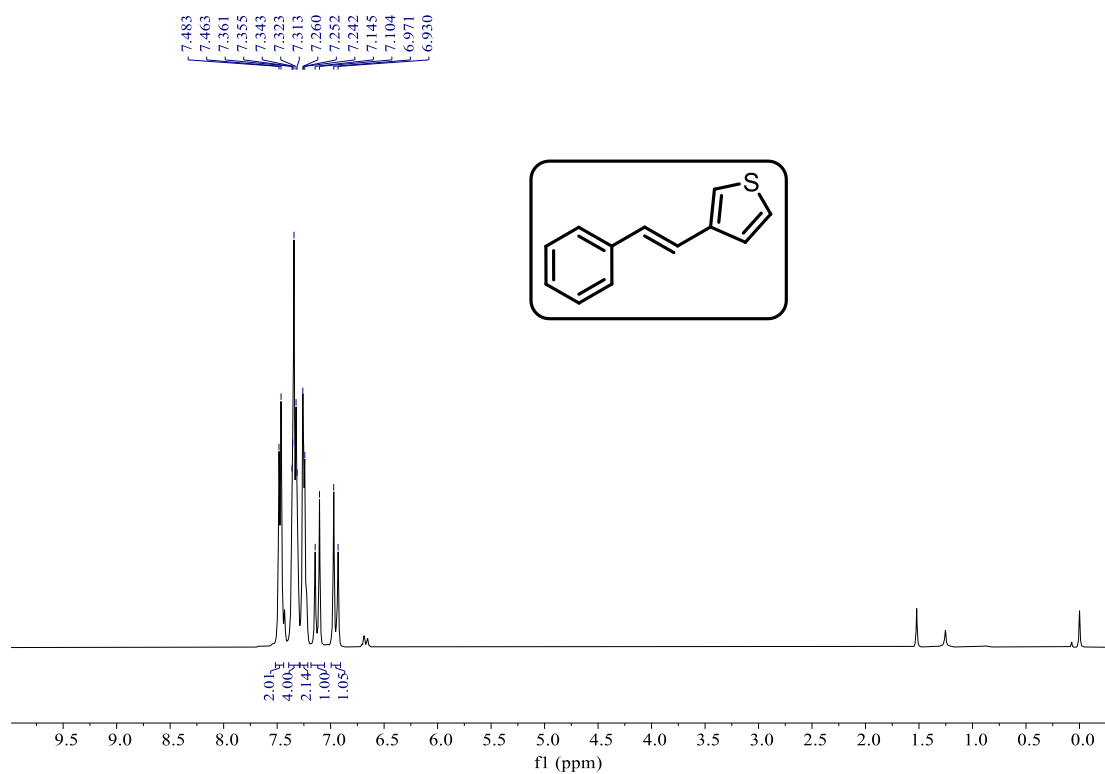

$^{13}\text{C}\{^1\text{H}\}$  NMR (100 MHz,  $\text{CDCl}_3$ )

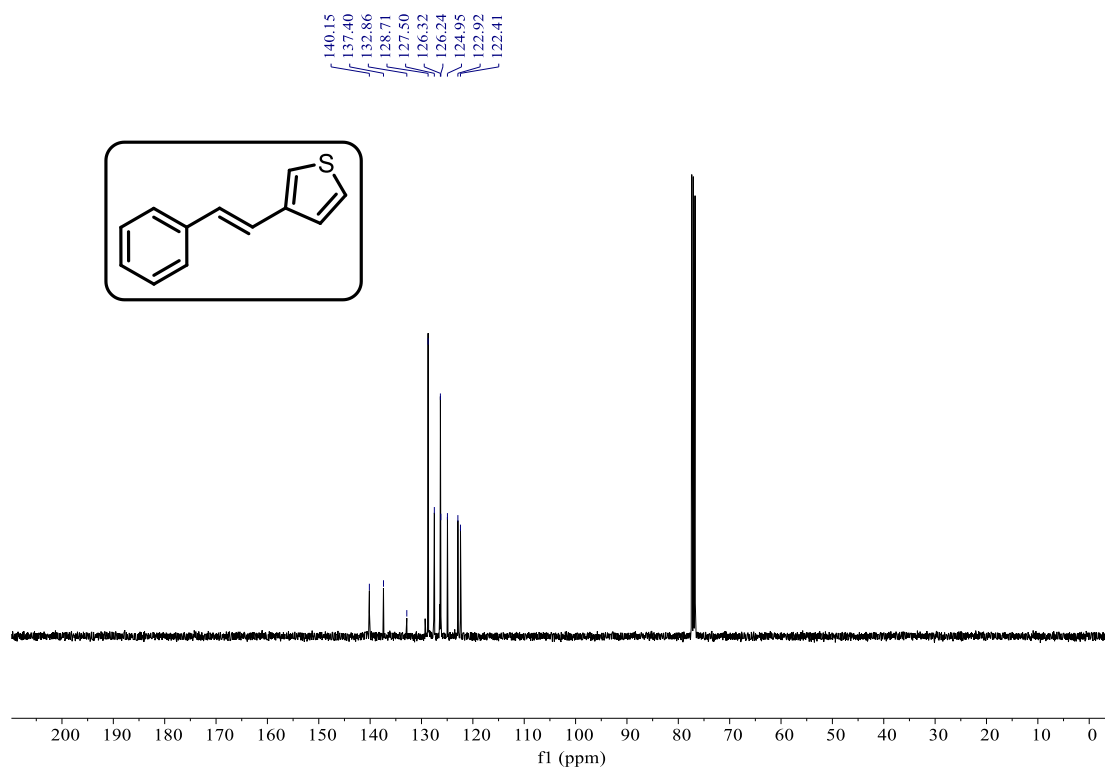

8-(2,2-difluoro-1-phenylethyl)-4-methyldihydro-4 $\lambda^4$ ,8 $\lambda^4$ -[1,3,2]oxazaborolo[2,3-*b*][1,3,2]oxazaborole-2,6(3*H*,5*H*)-dione (**35**)

$^1\text{H}$  NMR (400 MHz, acetone-*d*<sub>6</sub>)

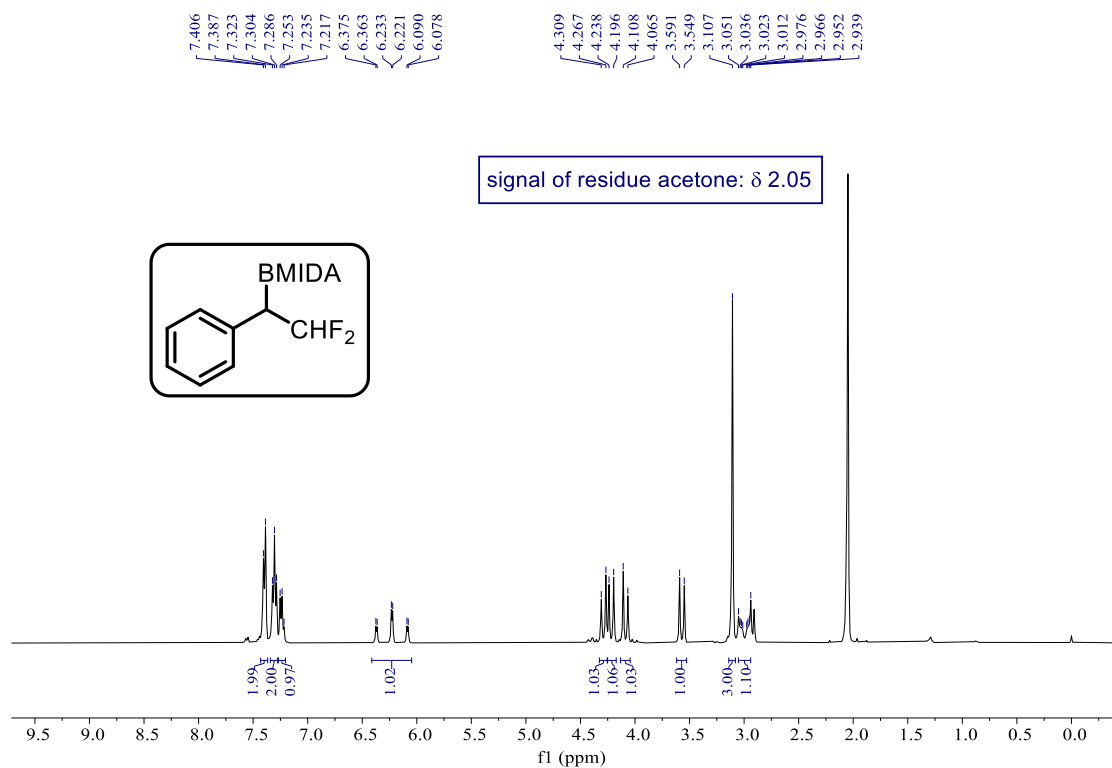

$^{13}\text{C}\{^1\text{H}\}$  NMR (100 MHz, acetone-*d*<sub>6</sub>)

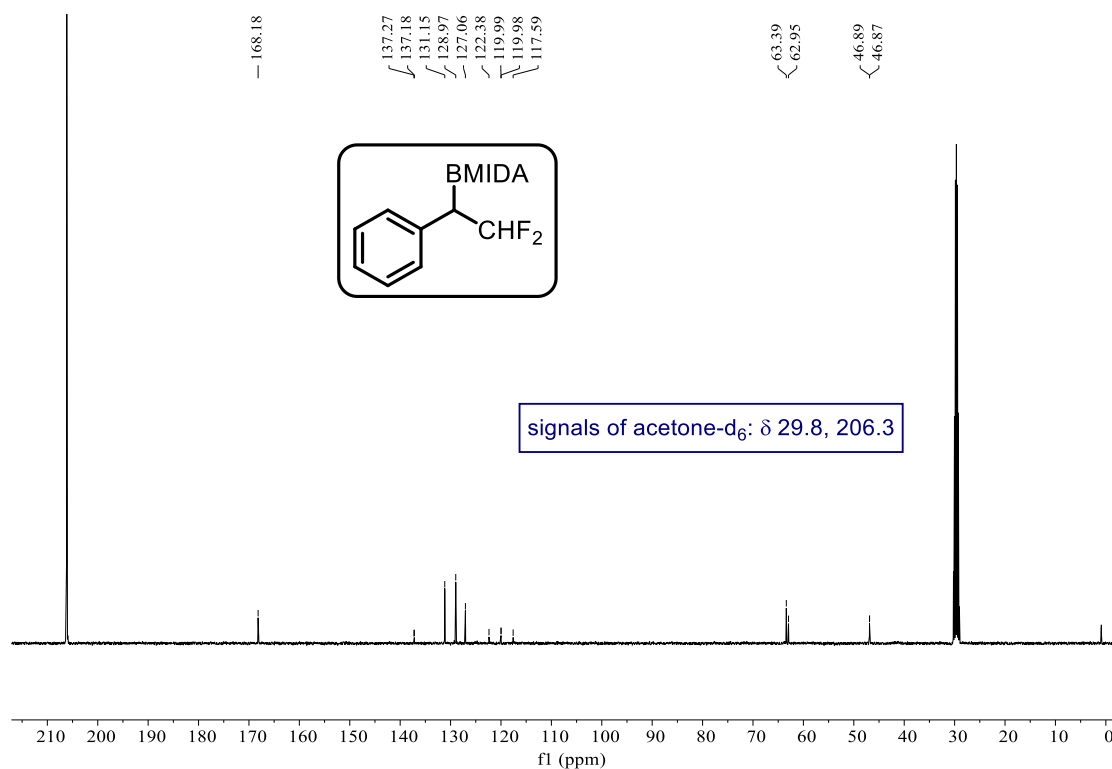

4-methyl-8-(3-phenyloxiran-2-yl)dihydro-4 $\lambda^4$ ,8 $\lambda^4$ -[1,3,2]oxazaborolo[2,3-*b*][1,3,2]oxazaborole-2,6(3*H*,5*H*)-dione (**36**)

$^1\text{H}$  NMR (400 MHz, acetone- $d_6$ )

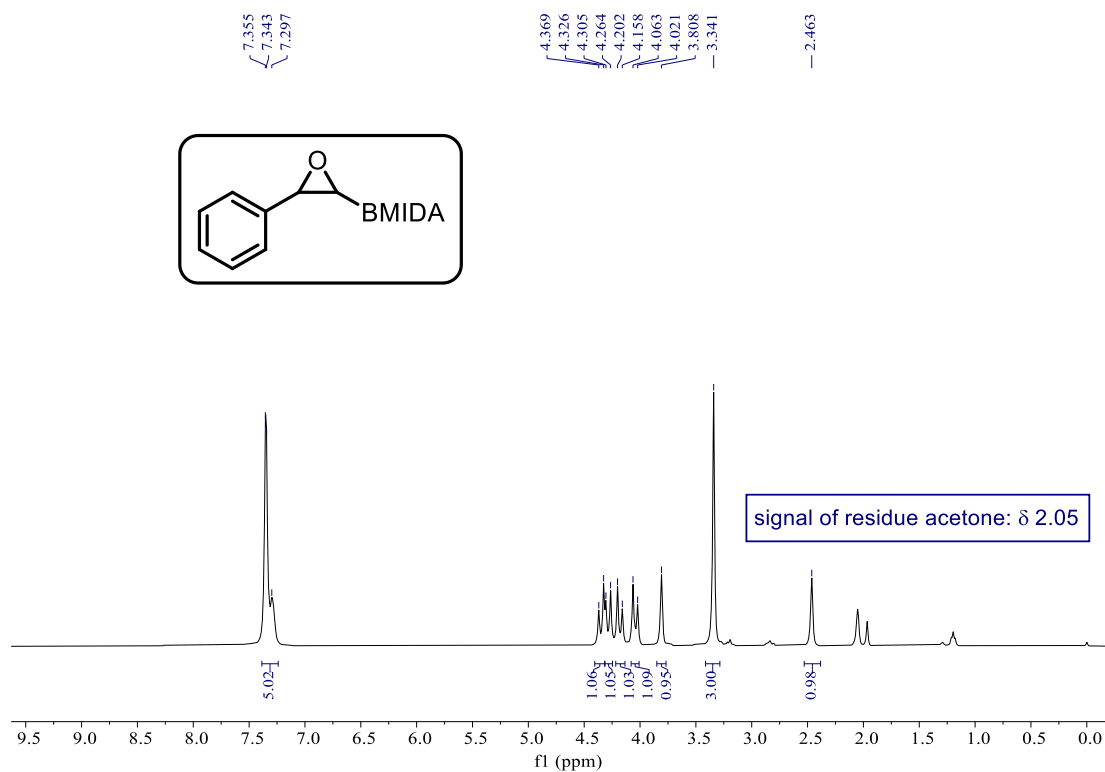

$^{13}\text{C}\{^1\text{H}\}$  NMR (100 MHz, acetone- $d_6$ )

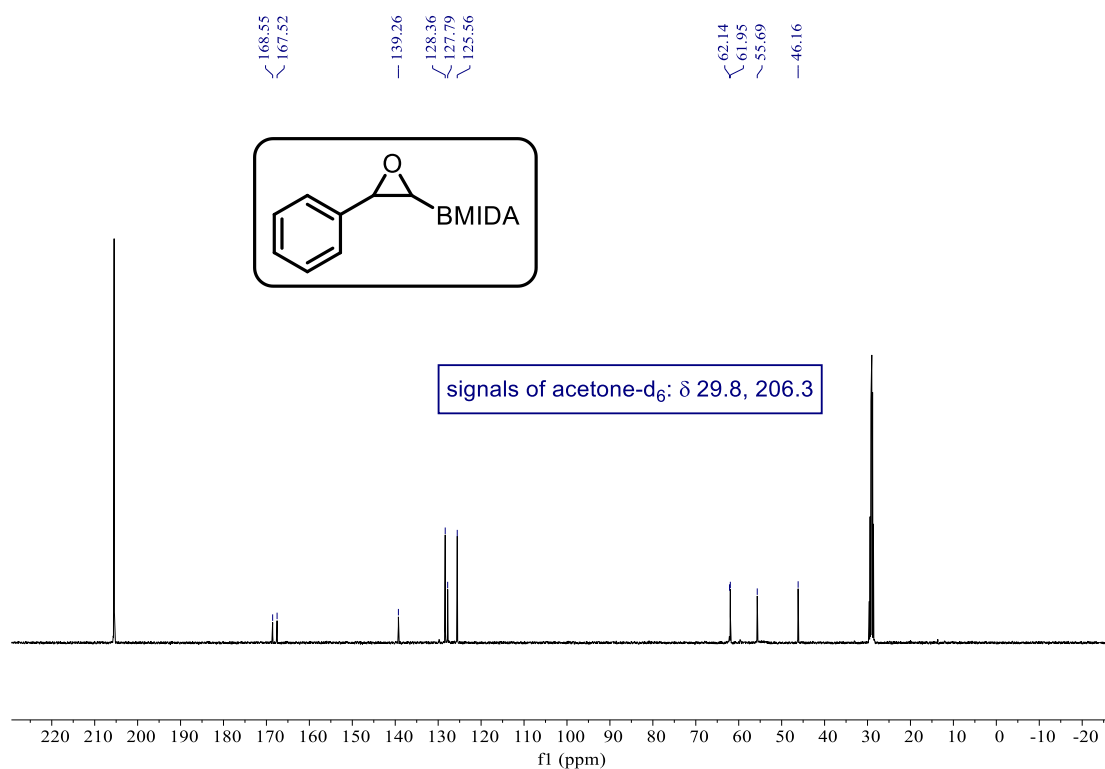

2-(4-methyl-2,6-dioxotetrahydro-2*H*-4 $\lambda^4$ ,8 $\lambda^4$ -[1,3,2]oxazaborolo[2,3-*b*][1,3,2]oxazaborol-8-yl)-2-phenylacetaldehyde (**37**)

$^1\text{H}$  NMR (400 MHz, acetone- $d_6$ )

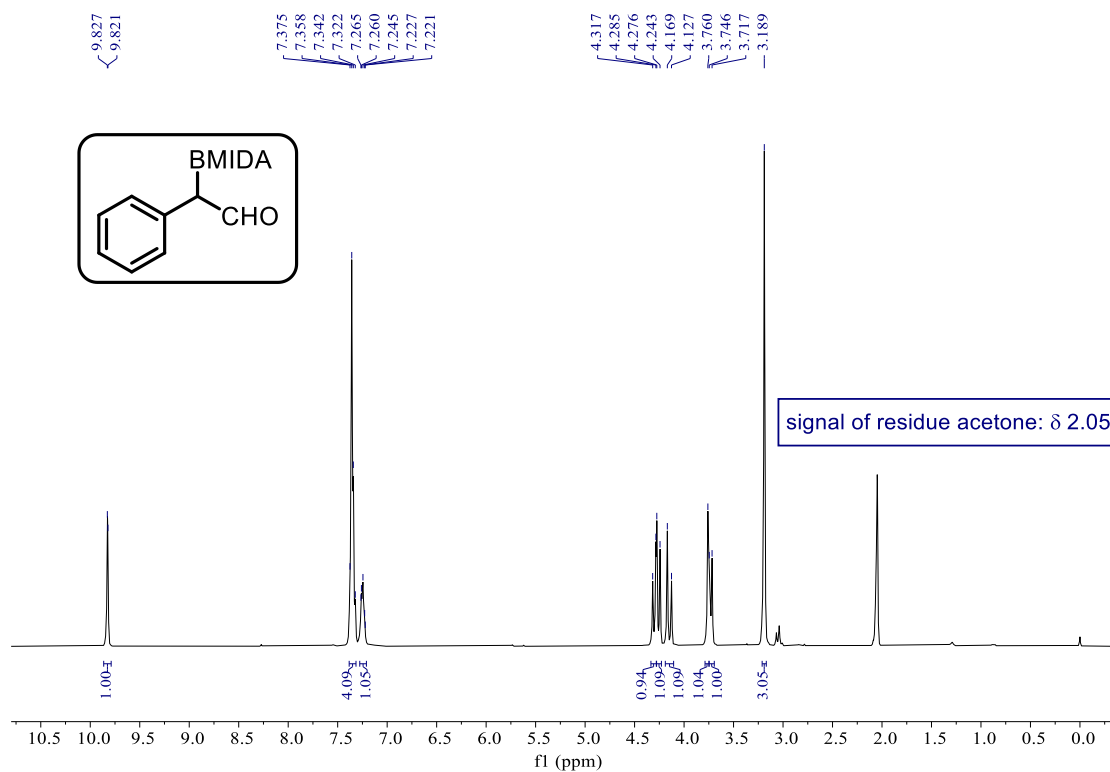

$^{13}\text{C}\{^1\text{H}\}$  NMR (100 MHz, acetone- $d_6$ )

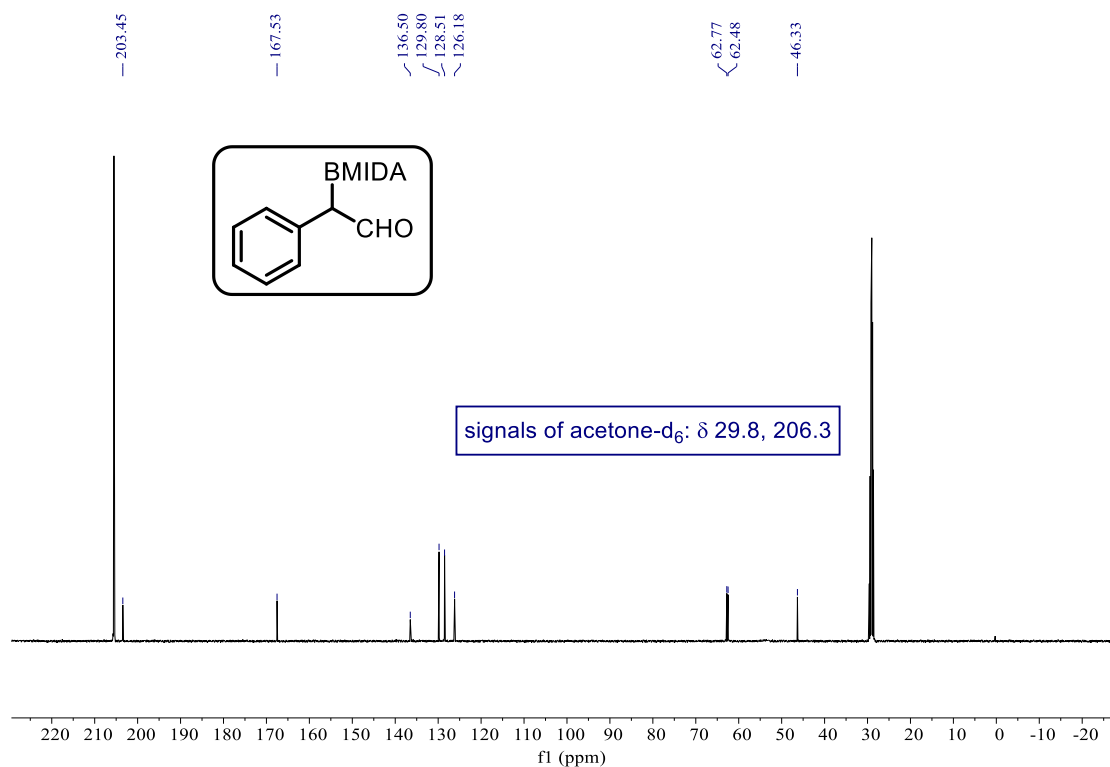



(*E*)-trifluoro(styryl)- $\lambda^4$ -borane, potassium salt (**38**)

$^1\text{H}$  NMR (400 MHz, acetone- $d_6$ )

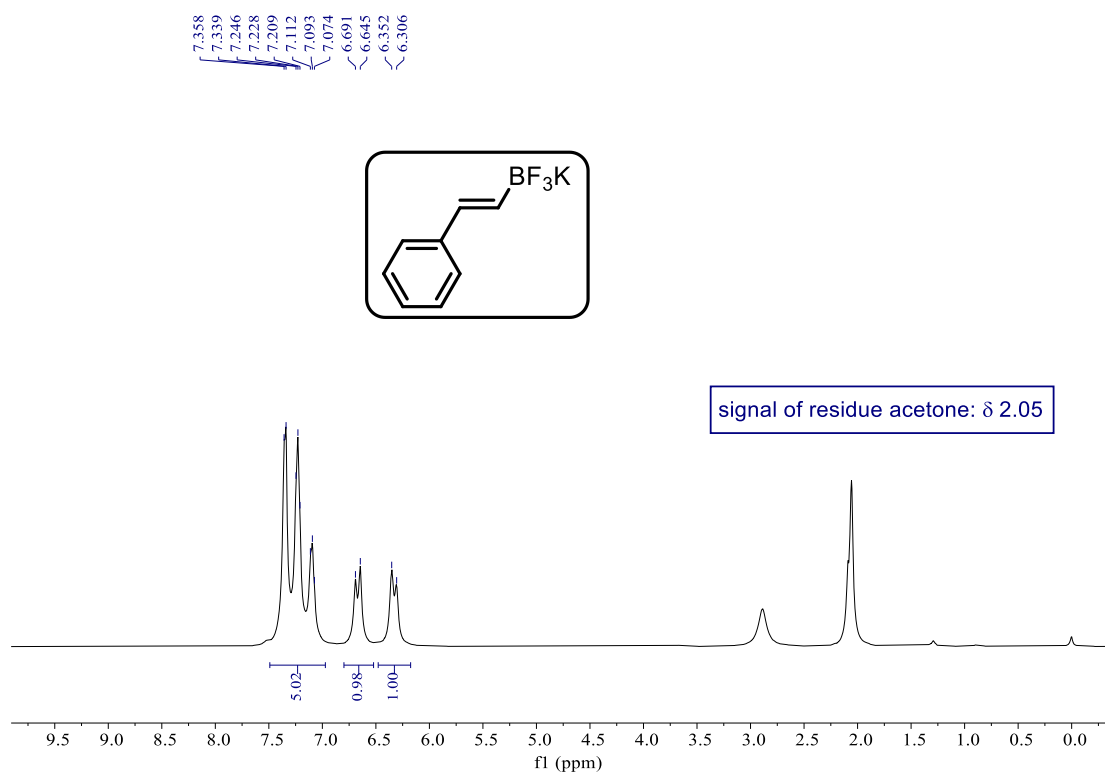

$^{13}\text{C}\{^1\text{H}\}$  NMR (100 MHz, acetone- $d_6$ )

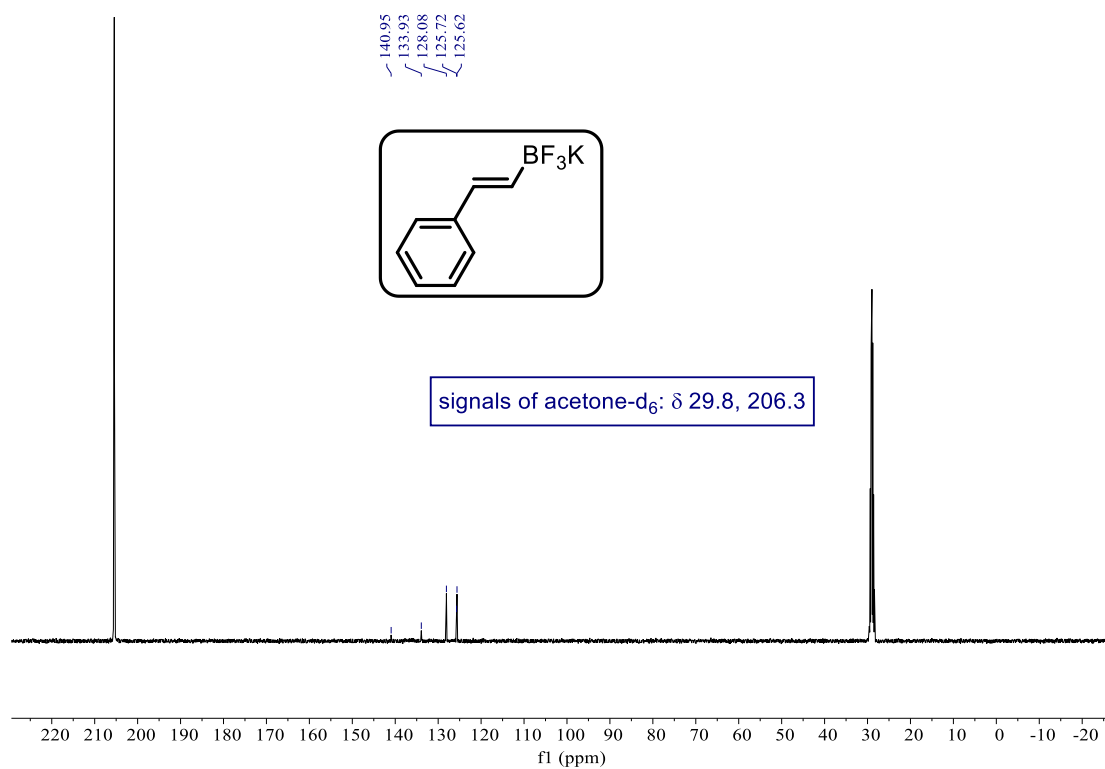

(*E*)-4,4,5,5-tetramethyl-2-styryl-1,3,2-dioxaborolane (**39**)

$^1\text{H}$  NMR (400 MHz,  $\text{CDCl}_3$ )

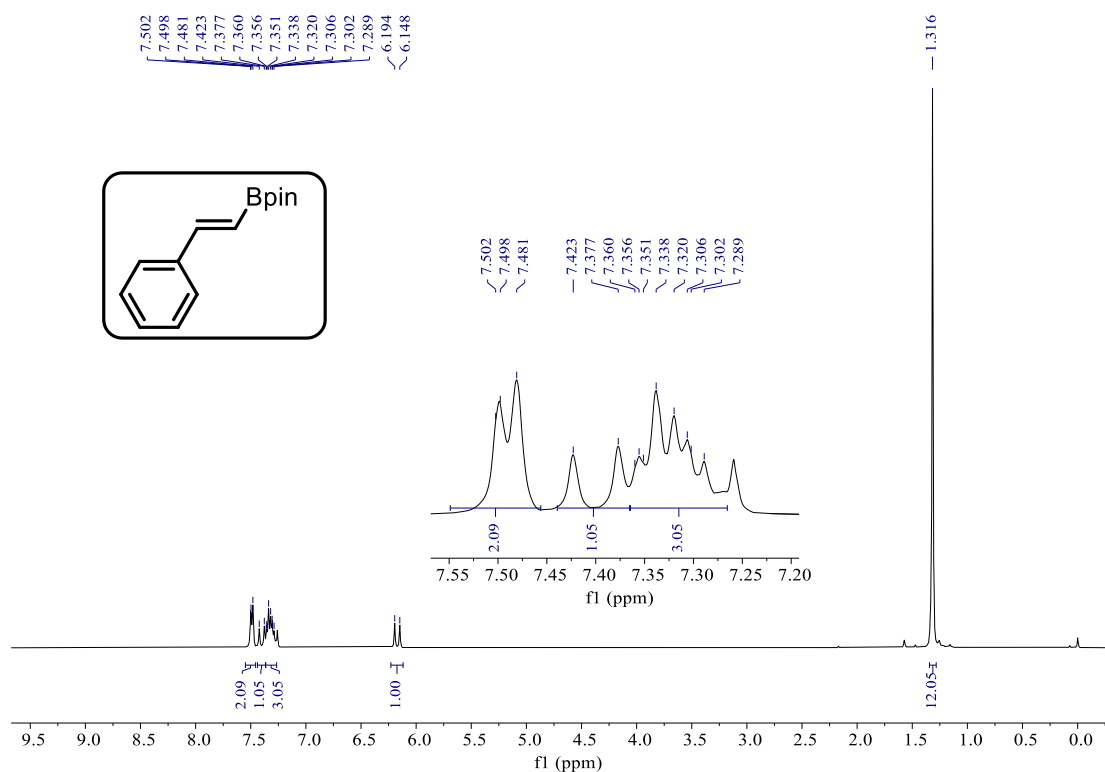

$^{13}\text{C}\{^1\text{H}\}$  NMR (100 MHz,  $\text{CDCl}_3$ )

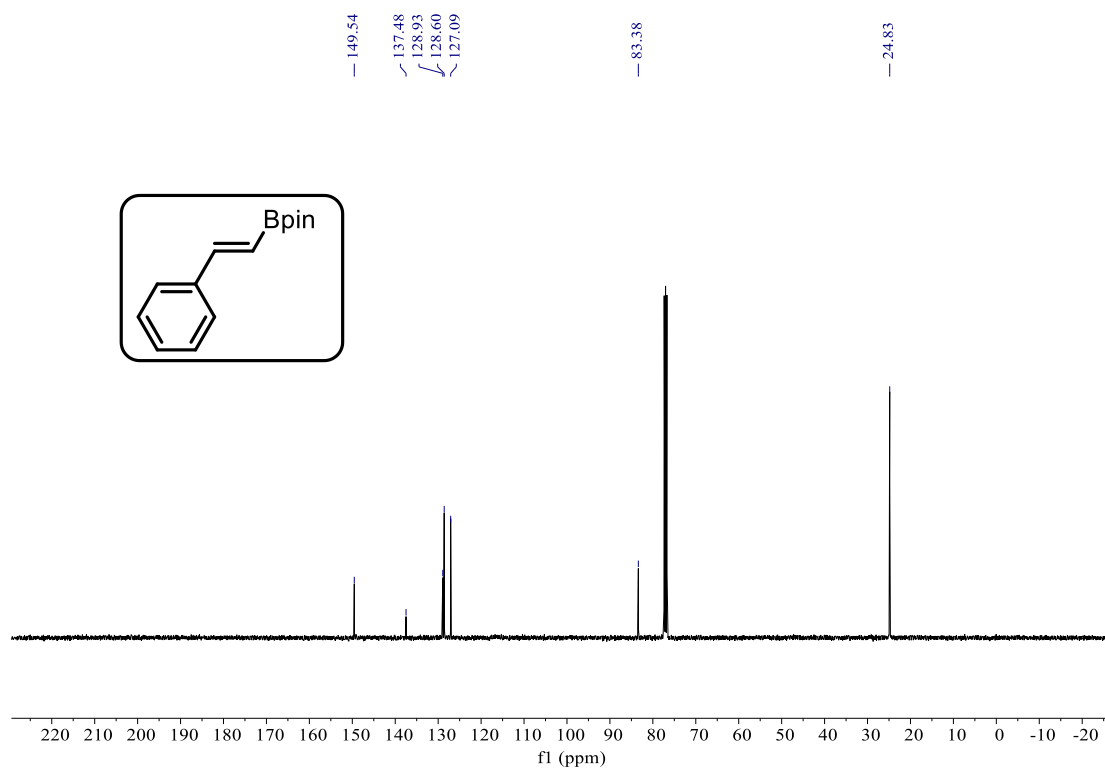

Supplement: d1cc06170d1.pdf [file d1cc06170d1.pdf]
